# Supplementary material for: Trends and differences in sexual practices and sexually transmitted infections in men who have sex with men only (MSMO) and men who have sex with men and women (MSMW): a repeated cross-sectional study in Melbourne, Australia
Source: PubMed Central journal article supplement — BMJ Open. 2020 Nov 24;10(11):e037608. doi: 10.1136/bmjopen-2020-037608 (PMC7689083; doi:10.1136/bmjopen-2020-037608), 2020-11-24
Supplement: bmjopen-2020-037608.draft_revisions.pdf [file bmjopen-2020-037608.draft_revisions.pdf]

# BMJ Open

BMJ Open is committed to open peer review. As part of this commitment we make the peer review history of every article we publish publicly available.

When an article is published we post the peer reviewers' comments and the authors' responses online. We also post the versions of the paper that were used during peer review. These are the versions that the peer review comments apply to.

The versions of the paper that follow are the versions that were submitted during the peer review process. They are not the versions of record or the final published versions. They should not be cited or distributed as the published version of this manuscript.

BMJ Open is an open access journal and the full, final, typeset and author-corrected version of record of the manuscript is available on our site with no access controls, subscription charges or pay-per-view fees (<http://bmjopen.bmj.com>).

If you have any questions on BMJ Open's open peer review process please email [info.bmjopen@bmj.com](mailto:info.bmjopen@bmj.com)

# BMJ Open

## Trends and differences in sexual practices and sexually transmitted infections in men who have sex with men only (MSMO) and men who have sex with men and women (MSMW) in Melbourne, Australia

|                               |                                                                                                                                                                                                                                                                                                                                                                                                                                                                                                                                                                                                                                                                  |
|-------------------------------|------------------------------------------------------------------------------------------------------------------------------------------------------------------------------------------------------------------------------------------------------------------------------------------------------------------------------------------------------------------------------------------------------------------------------------------------------------------------------------------------------------------------------------------------------------------------------------------------------------------------------------------------------------------|
| Journal:                      | <i>BMJ Open</i>                                                                                                                                                                                                                                                                                                                                                                                                                                                                                                                                                                                                                                                  |
| Manuscript ID                 | bmjopen-2020-037608                                                                                                                                                                                                                                                                                                                                                                                                                                                                                                                                                                                                                                              |
| Article Type:                 | Original research                                                                                                                                                                                                                                                                                                                                                                                                                                                                                                                                                                                                                                                |
| Date Submitted by the Author: | 09-Feb-2020                                                                                                                                                                                                                                                                                                                                                                                                                                                                                                                                                                                                                                                      |
| Complete List of Authors:     | Martin-Sanchez, Mario; Melbourne Sexual Health Centre; Preventive Medicine and Public Health Training Unit PSMar-UPF-ASPB , Case, Richard; Melbourne Sexual Health Centre<br>Fairley, Christopher; Melbourne Sexual Health Centre; Monash University Central Clinical School<br>Hocking, Jane; University of Melbourne, Melbourne School of Population and Global Health<br>Bradshaw, Catriona; Melbourne Sexual Health Centre<br>Ong, Jason; Melbourne Sexual Health Centre; Monash University Central Clinical School<br>Chen, Marcus; Melbourne Sexual Health Centre<br>Chow, Eric; Melbourne Sexual Health Centre; Monash University Central Clinical School |
| Keywords:                     | SEXUAL MEDICINE, Epidemiology < INFECTIOUS DISEASES, Public health < INFECTIOUS DISEASES, HIV & AIDS < INFECTIOUS DISEASES                                                                                                                                                                                                                                                                                                                                                                                                                                                                                                                                       |
|                               |                                                                                                                                                                                                                                                                                                                                                                                                                                                                                                                                                                                                                                                                  |

SCHOLARONE™  
Manuscripts

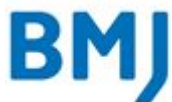

I, the Submitting Author has the right to grant and does grant on behalf of all authors of the Work (as defined in the below author licence), an exclusive licence and/or a non-exclusive licence for contributions from authors who are: i) UK Crown employees; ii) where BMJ has agreed a CC-BY licence shall apply, and/or iii) in accordance with the terms applicable for US Federal Government officers or employees acting as part of their official duties; on a worldwide, perpetual, irrevocable, royalty-free basis to BMJ Publishing Group Ltd ("BMJ") its licensees and where the relevant Journal is co-owned by BMJ to the co-owners of the Journal, to publish the Work in this journal and any other BMJ products and to exploit all rights, as set out in our [licence](#).

The Submitting Author accepts and understands that any supply made under these terms is made by BMJ to the Submitting Author unless you are acting as an employee on behalf of your employer or a postgraduate student of an affiliated institution which is paying any applicable article publishing charge ("APC") for Open Access articles. Where the Submitting Author wishes to make the Work available on an Open Access basis (and intends to pay the relevant APC), the terms of reuse of such Open Access shall be governed by a Creative Commons licence – details of these licences and which [Creative Commons](#) licence will apply to this Work are set out in our licence referred to above.

Other than as permitted in any relevant BMJ Author's Self Archiving Policies, I confirm this Work has not been accepted for publication elsewhere, is not being considered for publication elsewhere and does not duplicate material already published. I confirm all authors consent to publication of this Work and authorise the granting of this licence.

1  
2  
3 **Trends and differences in sexual practices and sexually transmitted infections in men**  
4 **who have sex with men only (MSMO) and men who have sex with men and women**  
5 **(MSMW) in Melbourne, Australia**  
6  
7  
8  
9

10 Mario Martín-Sánchez,<sup>1,2</sup> Richard Case,<sup>1</sup> Christopher K. Fairley,<sup>1,3</sup> Jane S. Hocking,<sup>4</sup>  
11  
12 Catriona S. Bradshaw,<sup>1,3</sup> Jason J. Ong,<sup>1,3</sup> Marcus Y. Chen,<sup>1,3</sup> Eric P.F. Chow<sup>1,3</sup>  
13  
14

- 15 1. Melbourne Sexual Health Centre, Alfred Health, Melbourne, Victoria, Australia
- 16 2. Preventive Medicine and Public Health Training Unit PSMar-UPF-ASPb, Barcelona,  
17 Spain
- 18 3. Central Clinical School, Monash University, Melbourne, Victoria, Australia
- 19 4. Melbourne School of Population and Global Health, University of Melbourne,  
20 Carlton, Victoria, Australia
- 21
- 22
- 23
- 24
- 25
- 26

27 Email:

28  
29 MMS: [martinsanchezmario@gmail.com](mailto:martinsanchezmario@gmail.com)

30  
31 RC: [r.case@student.unimelb.edu.au](mailto:r.case@student.unimelb.edu.au)

32  
33 CKF: [cfairley@mshc.org.au](mailto:cfairley@mshc.org.au)

34  
35 JSH: [j.hocking@unimelb.edu.au](mailto:j.hocking@unimelb.edu.au)

36  
37 CSB: [Catriona.bradshaw@monash.edu](mailto:Catriona.bradshaw@monash.edu)

38  
39 JJO: [jong@mshc.org.au](mailto:jong@mshc.org.au)

40  
41 MYC: [mchen@mshc.org.au](mailto:mchen@mshc.org.au)

42  
43 EPFC: [eric.chow@monash.edu](mailto:eric.chow@monash.edu)  
44  
45  
46  
47  
48  
49

50 Address for correspondence: Associate Professor Eric P.F. Chow, PhD, MPH.

51 Melbourne Sexual Health Centre, 580 Swanston Street, Carlton, VIC 3053, Australia,

52 Phone: +61 (3) 9341-6233, email: [eric.chow@monash.edu](mailto:eric.chow@monash.edu)  
53  
54  
55

56 **Keywords:** Bisexuality, sexual behaviours, men who have sex with men, Sexually  
57 Transmitted Diseases, HIV, Syphilis  
58  
59  
60

## ABSTRACT

### Objectives

There has been an increase in syphilis and gonorrhoea in urban heterosexual populations in Australia since 2015. Men who have sex with men and women (MSMW) may act as a bridging population for sexually transmitted infections (STI) transmission from men who have sex with men (MSM) to the heterosexual population. We aimed to compare the sexual practices and the trends in HIV/STI positivity between MSM only (MSMO) and MSMW.

### Methods

We conducted a repeated cross-sectional study using data from MSM attending the Melbourne Sexual Health Centre, Australia, between 2011 and 2018. We examined the annual trends of sexual practices and HIV/STI positivity and assessed its association with sexual practice using logistic regression in MSMO and MSMW.

### Results

Compared to MSMW ( $N=2,030$ ), MSMO ( $N=13,282$ ) were more likely to practice anal sex and to have condomless receptive anal sex with casual male partners, and less likely to have a current regular relationship. Over the 8-year period, there was an increase in condomless receptive anal sex with casual male partners for both groups (MSMO: from 45.9% to 64.3%,  $P_{\text{trend}}=0.011$ ; MSMW: from 41.3% to 58.1%,  $P_{\text{trend}}=0.037$ ) and condomless sex with female partners in MSMW (from 65.4% to 71.1%,  $P_{\text{trend}}=0.022$ ). Syphilis positivity increased in MSMO, (from 5.6% to 8.1%,  $P_{\text{trend}}=0.025$ ) and in MSMW (from 0.9% to 6.0%,  $P_{\text{trend}}=0.040$ ) but HIV, chlamydia and gonorrhoea remained stable.

### Conclusion

MSMW had low condom use with both male and female partners which may potentially act as a transmission bridge of HIV/STI from MSM to heterosexuals.

## ARTICLE SUMMARY

### Strengths and limitations of this study

- We compared sexual practices and HIV/sexually transmitted infections positivity in a high number of men who have sex with men only (N=13,282) and men who have sex with men and women (N=2,030) over an 8-year period
- We provide a comprehensive description of sexual practices distinguishing between condom use with regular or casual sexual partners, and in receptive or insertive anal sex
- The study was conducted in one urban major sexual health clinic and it is possible that our findings may not be generalizable to other settings.
- We were unable to analyse the statistical significance of the temporal trends for gonorrhoea and chlamydia due to a change in the diagnostic test in 2015

## INTRODUCTION

Despite considerable public health efforts and biomedical advances,<sup>1</sup> the rate of sexually transmitted infections (STIs) is increasing at an alarming rate particularly among gay, bisexual and other men who have sex with men (MSM) worldwide.<sup>2</sup> In Australia, there was a 80% increase in the rate of gonorrhoea (from 65.5 to 118.0 per 100,000), a 14% increase in the rate of chlamydia (from 364.5 to 416.8 per 100,000) and more than a two-fold increase in the rate of syphilis (from 7.8 to 18.3 per 100,000) between 2013 and 2017.<sup>3</sup> In males, most of the early rises in gonorrhoea and syphilis were accounted for by rises in MSM. However, in the last few years there has been a dramatic increase in both infections in the Australian heterosexual population to levels not seen since the 1980's. In stark contrast to the rise in gonorrhoea and syphilis, there has been an 11% decline in the HIV notification rate from 4.5 per 100,000 in 2013 to 4.0 in 2017 among MSM in Australia, with most of the reduction occurring between 2016 and 2017 after the introduction of pre-exposure prophylaxis (PrEP) in late 2016.<sup>3-5</sup>

The cause for the recent rise in gonorrhoea and syphilis in heterosexuals remains unclear,<sup>6-9</sup> but a few epidemiological and genomics studies have proposed that bisexual MSM (or men who have sex with men and women) may act as a potential bridging population for STI transmission from MSM to the broader heterosexual population and hence contribute to the rise in STI in heterosexuals.<sup>1,10,11</sup> In this study, we aimed to compare the demographic characteristics and sexual practices, and describe the trends in HIV/STI positivity in men who have sex with men only (MSMO) and men who have sex with men and women (MSMW) attending a large sexual health clinic in Melbourne between 2011 and 2018.

## METHODS

1  
2  
3 We conducted a repeated cross-sectional analysis of retrospective data of MSM attending the  
4 Melbourne Sexual Health Centre (MSHC), Australia, between 2011 and 2018. MSHC is a  
5 public clinic that offers a range of free clinical services regarding sexual health. MSHC is the  
6 largest sexual health clinic in Victoria and provides more than 50,000 clinical consultations a  
7 year, approximately 40% of clients are MSM.<sup>4</sup> Upon arrival, all clients are invited to  
8 complete a questionnaire via computer-assisted self-interviewing (CASI), which collects  
9 client's demographic characteristics (e.g. age, country of birth, Aboriginal and Torres Strait  
10 Islander status), sexual practices (i.e. gender of partners, type of partners [regular or casual],  
11 number of partners, condom use and anal sex practice [receptive anal intercourse (RAI) and  
12 insertive anal intercourse (IAI)], sex work and injecting drug use behaviour. Data on sexual  
13 practices and injecting drug use were measured in the past 12 months, and sex work status  
14 was defined as clients who had ever worked in the sex industry during lifetime. Clients are  
15 allowed to decline to answer any questions they may wish to.  
16  
17  
18  
19  
20  
21  
22  
23  
24  
25  
26  
27  
28  
29  
30  
31  
32  
33  
34

35 Clients who were male, aged 18 years and above, reported having sex with another man in  
36 the past 12 months, and attended MSHC for the first time between 2011 and 2018 were  
37 included in this analysis. Only data from the client's first visit to MSHC was included in the  
38 analysis. We categorised MSM into two main categories based on their self-reported sexual  
39 practices: (1) men who have sex with men only (MSMO), and (2) men who have sex with  
40 men and women (MSMW). It is reasonably hypothesised that the characteristics of MSMW  
41 who predominately have male partners are similar to MSMO; while MSMW who  
42 predominately have female partners are similar to men who have sex with women only.  
43  
44 Therefore, we further categorised MSMW into two groups: (1) MSM who reported more  
45 female partners than male partners in the past 12 months (MSMW-W); and (2) MSM who  
46 reported more male partners than female partners in the past 12 months (MSMW-M) and  
47  
48  
49  
50  
51  
52  
53  
54  
55  
56  
57  
58  
59  
60



1  
2  
3 compared the characteristics between the two groups. Men with an equal number of male and  
4  
5 female partners in the past 12 months (N=343) were excluded in the comparisons among  
6  
7 MSMW subgroups but they were included in the overall MSMW category.  
8  
9

10  
11  
12 We also extracted the HIV/STI testing results on the day. STI testing results included  
13  
14 syphilis, gonorrhoea (stratified by anatomical site: anorectal, urethral and oropharyngeal) and  
15  
16 chlamydia (stratified by anatomical site: anorectal and urethral). There was a major change in  
17  
18 gonorrhoea and chlamydia testing at our clinic.<sup>12</sup> Prior to 2015, gonorrhoea was diagnosed by  
19  
20 using culture and chlamydia was diagnosed by nucleic acid amplification test (NAAT) using  
21  
22 the BD ProbeTec Strand Displacement Amplification Assay (Becton, Dickinson and Co.,  
23  
24 Sparks, MD, USA). From March 2015 onwards, testing for both gonorrhoea and chlamydia  
25  
26 was performed using the Aptima Combo 2 Transcription-Mediated Amplification Assay  
27  
28 (AC2) (Hologic Gen-Probe, San Diego, CA, USA). HIV and serologic syphilis diagnostics  
29  
30 did not change during the study period. Before July 2015, screening for urethral gonorrhoea  
31  
32 was only performed in MSM with urethral symptoms as per the Australian guidelines.<sup>13</sup>  
33  
34 However, since July 2015, all MSM were screened for urethral gonorrhoea and chlamydia  
35  
36 regardless of the presence of symptoms as per our clinic policy.<sup>14</sup> Therefore, the positivity for  
37  
38 urethral gonorrhoea was calculated as the number of men tested positive divided by the  
39  
40 number of men who were tested or urethral chlamydia to avoid the bias of testing urethral  
41  
42 gonorrhoea among symptomatic MSM, and this approach was also used elsewhere.<sup>15</sup> In  
43  
44 addition, routine screening for oropharyngeal chlamydia among all MSM at MSHC were  
45  
46 introduced in April 2017; however, routine screening for oropharyngeal gonorrhoea were  
47  
48 conducted among all MSM and it did not change over the study period.  
49  
50  
51  
52  
53  
54  
55  
56  
57  
58  
59  
60

1  
2  
3 Chi-squared test was used to compare the demographic characteristics and sexual practices  
4  
5 between risk groups. We examined the annual trends of sexual practices and HIV/STI  
6  
7 positivity for MSMO and MSMW using chi-squared trend test. Annual trends for condomless  
8  
9 IAI and RAI with casual male partners were examined separately. We reported any  
10  
11 condomless sex (i.e. IAI and/or RAI) with regular male partners for the trend analysis due to  
12  
13 small number of participants reported having regular male partners in our cohort. For  
14  
15 chlamydia and gonorrhoea positivity, we calculated the annual trends for 2011-2014 and  
16  
17 2015-2018 separately due to the change of the diagnostic assays. Finally, we assessed the  
18  
19 association between sexual practices and STI/HIV positivity using univariable and  
20  
21 multivariable logistic regression and reporting the crude odds ratio (OR) and adjusted odds  
22  
23 ratio (aOR), and their respective 95% confidence intervals (CI). We fitted a model including  
24  
25 the year of the visit and all potential confounding factors (i.e., variables with  $P < 0.20$  in the  
26  
27 univariable analyses) in the multivariable analysis. The 0.05 level was used for statistical  
28  
29 significance in all the analysis. All statistical analyses were conducted using SPSS V.25. This  
30  
31 study was approved by the Alfred Hospital Ethics Committee, Melbourne, Australia (83/18).  
32  
33  
34  
35  
36  
37 No additional data available.  
38  
39  
40  
41

### 42 ***Patient and Public Involvement***

43  
44 Patients were not directly involved in this study; only data gathered retrospectively and  
45  
46 coming from electronic health records was used.  
47  
48  
49

## 50 51 **RESULTS**

### 52 ***Demographic characteristics***

53  
54 There were 18,851 MSM attending MSHC for the first time between 2011 and 2018. We  
55  
56 excluded 1,909 MSM (10.1%) who had had sexual contact with another man but declined to  
57  
58  
59  
60

1  
2  
3 report the number of male sexual partners and 1,630 MSM (8.6%) who reported no male  
4 sexual partner in the past 12 months at the current visit but had previously reported male  
5 partners at the clinic. The remaining 15,312 participants were included in this data analysis,  
6 including 13,282 MSMO (86.7%) and 2,030 MSMW (13.3%). Among 2,030 MSMW, 859  
7 (42.3%) were MSMW-W, 828 (40.8%) MSMW-M and 343 (16.9%) had equal number of  
8 male and female partners in the past 12 months.  
9  
10  
11  
12  
13  
14  
15  
16  
17  
18

19 Of the 15,312 MSM, the median age was 27 years (interquartile range, IQR: 23-33) but  
20 MSMW were slightly older than MSMO (median age: 29 *versus* 27;  $p < 0.001$ ) (Table 1). The  
21 proportion of men born in Australia was higher in MSMW than in MSMO (57.9% *versus*  
22 50.5%,  $p < 0.001$ ). The proportion of injecting drug use in the past 12 months was higher in  
23 MSMW than MSMO (2.5% *versus* 1.7%,  $P = 0.029$ ; Table 1); and it was similar in MSMW-W  
24 and in MSMW-M (3.1% *versus* 2.5%,  $P = 0.480$ ; Table S1).  
25  
26  
27  
28  
29  
30  
31  
32  
33  
34

### 35 *Sexual practices*

36  
37 The proportion of men who reported sex overseas in the past 12 months was significantly  
38 higher in MSMW than in MSMO (39.5% *versus* 36.7%;  $P = 0.019$ ); and more MSMW-W  
39 (45.7%) reported sex overseas than MSMW-M (37.1%;  $P = 0.001$ ) (Table S1). Less than half  
40 (40.5%) of MSMO had a male regular partner. Among MSMW, 8.5% had a regular male  
41 partner, 33.4% a regular female partner, and 4.6% had regular male and female partners  
42 (Table 1).  
43  
44  
45  
46  
47  
48  
49  
50  
51  
52

53 The proportion of MSM reporting  $\geq 5$  sexual partners (regardless gender of the partners) in  
54 the past 12 months, was higher among MSMW (80.6% in MSMW-M and 69.7% in MSMW-  
55 W) than MSMO (55.8%;  $P < 0.001$ ), and this proportion increased significantly in MSMW  
56  
57  
58  
59  
60

1  
2  
3 (from 63.1% in 2011 to 70.8% in 2018,  $P_{\text{trend}}=0.026$ ) but only increased marginally in  
4  
5 MSMO (from 50.4% to 56.6%;  $P_{\text{trend}}=0.052$ ) In addition, the proportion of MSMW with  $\geq 5$   
6  
7 female sexual partners increased significantly from 23.2% in 2011 to 30.3% in 2018 ( $P_{\text{trend}}$   
8  
9  $=0.026$ ) (Table S2-S3).

10  
11  
12  
13  
14  
15 Anal sex practices with casual male partners varied between MSMO and MSMW. The  
16  
17 proportion of MSMO having RAI only with casual male partners was higher (10.5%) than in  
18  
19 MSMW (7.0%); however, the proportion of MSMO having IAI only with casual male  
20  
21 partners was lower (11.2%) than in MSMW (15.0%) ( $P<0.001$ ). Condomless sex with casual  
22  
23 male partners in the past 12 months was more common in MSMO than in MSMW for RAI  
24  
25 (54.3% *versus* 50.2%;  $P=0.006$ ) but there was no significant difference in IAI. Two-thirds  
26  
27 (67.4%) of MSMW had condomless vaginal or anal sex with female casual partners in the  
28  
29 past 12 months (Table 1). Among MSMO, there was a 40.1% increase in condomless RAI  
30  
31 ( $P_{\text{trend}}=0.011$ ) and 43.1% increase in IAI ( $P_{\text{trend}}=0.012$ ) with casual male partners in the past  
32  
33 12 months (Figure 1). Similarly, among MSMW, there was a 41.5% increase in condomless  
34  
35 RAI ( $P_{\text{trend}}=0.037$ ) and an 8.7% increase in condomless vaginal or anal sex with female  
36  
37 casual partners ( $P_{\text{trend}}=0.022$ ). The proportion of condomless IAI with casual male partners  
38  
39 did not change during the study period ( $P_{\text{trend}}=0.354$ ) (Figure 1, Table S2-S3). MSMW-M  
40  
41 showed a lower use of condom with casual male partners but a higher use with casual female  
42  
43 partners compared to MSMW-W (Table S1).  
44  
45  
46  
47  
48  
49  
50

51  
52 Regarding regular male partners, both condomless RAI and condomless IAI were more  
53  
54 commonly reported in MSMO (RAI: 71.9%; IAI: 71.5%) than in MSMW (RAI: 62.8%; IAI:  
55  
56 63.4%;  $P=0.003$ ;  $P=0.007$ ) (Table 1) and condomless anal sex regardless of IAS or RAS,  
57  
58  
59  
60

1  
2  
3 increased from 69.1% to 78.5% in MSMO ( $P_{\text{trend}}=0.020$ ) but not in MSMW ( $P_{\text{trend}}=0.467$ )  
4  
5 (Figure 1, Table S2-S3).  
6  
7  
8  
9

### 10 ***HIV/STI positivity***

11  
12 Overall, MSMO had a higher HIV, syphilis, gonorrhoea and chlamydia positivity than  
13  
14 MSMW (Table 2). MSMO had higher extra-genital gonorrhoea and chlamydia positivity than  
15  
16 MSMW; however, the positivity for urethral gonorrhoea and urethral chlamydia did not differ  
17  
18 between the two groups. There was no increase in gonorrhoea and chlamydia positivity in the  
19  
20 periods 2011-2014 and 2015-2018 in both groups (Table S6-S7). Among MSMW, MSMW-  
21  
22 M had a higher gonorrhoea and chlamydia positivity but not HIV and syphilis compared to  
23  
24 MSMW-W (Table S4).  
25  
26  
27  
28  
29  
30

31 There was a 44.6% increase in syphilis positivity from 5.6% in 2011 to 8.1% in 2018 ( $P_{\text{trend}}$   
32  
33  $=0.025$ ) in MSMO and more than a six-fold increase in syphilis positivity from 0.9% in 2011  
34  
35 to 6.0% in 2018 ( $P_{\text{trend}}=0.040$ ) in MSMW. HIV positivity did not change in both groups  
36  
37 between 2011 and 2018 (Table S6-S7).  
38  
39  
40  
41

42 After adjusting for other potential confounding factors, MSMO had higher odds of testing  
43  
44 positive for gonorrhoea at any anatomical site (aOR 1.32, 95% CI 1.11 to 1.58), chlamydia at  
45  
46 any anatomical site (aOR 1.38; 95% CI 1.15 to 1.65), syphilis (aOR 1.71, 95% CI 1.35 to  
47  
48 2.16) and HIV (aOR 4.41, 95% CI 2.46 to 7.91) compared to MSMW (Table 3).  
49

50  
51 Additionally, MSMO had higher odds of testing positive for gonorrhoea at any anatomical  
52  
53 site (aOR 1.48; 95% CI 1.09 to 2.01), chlamydia at any anatomical site (aOR 1.46; 95% CI  
54  
55 1.08 to 1.96), syphilis (aOR 2.10, 95% CI 1.37 to 3.23), and HIV (aOR 6.32, 95% CI 2.01 to  
56  
57 19.90) compared with MSMW-W in the adjusted analysis; however, there was no significant  
58  
59  
60

1  
2  
3 difference in HIV/STI positivity between MSMW-M and MSMW-W in the adjusted analysis  
4  
5 (Table S5).  
6  
7  
8  
9

## 10 **DISCUSSION**

11  
12 In this study of 13,282 MSMO and 2,030 MSMW in Melbourne, Australia, we found that  
13  
14 there were significant changes in sexual practices among bisexual men over the period in  
15  
16 which rates of STIs had been increasing in heterosexual men and women. Specifically, we  
17  
18 found that condomless anal sex with casual male partners and condomless anal sex with  
19  
20 female partners had increased in bisexual men as had the positivity for syphilis. While the  
21  
22 sexual risks and STI positivity was generally lower in bisexual men than for MSMO, their  
23  
24 rising rates are consistent with the hypothesis that there may be more transmission to  
25  
26 heterosexuals than had occurred previously. Clarifying this issue and what factors are causing  
27  
28 the rising rates of STIs is likely to contribute significantly to the design of STI control  
29  
30 programs.  
31  
32  
33  
34  
35  
36  
37

38 A number of other studies have assessed HIV and sexual practices in bisexual men but their  
39  
40 results are conflicting. A meta-analysis published in 2014 concluded that MSMW had a lower  
41  
42 HIV prevalence (16.9%) compared to MSMO (33.3%) but higher than men who have sex  
43  
44 with women only (MSWO) (3.5%) which was consistent with our findings.<sup>16</sup> Consistent with  
45  
46 our findings, the authors found that MSMW (15.9%) were less likely to engage in  
47  
48 condomless receptive anal sex compared to MSMO (35.0%).<sup>16</sup> However, some other studies  
49  
50 conducted in different settings, such as China, India and the US, have shown the risk of HIV  
51  
52 among MSMW is similar or even at a higher risk compared to MSMO.<sup>17-20</sup>  
53  
54  
55  
56  
57  
58  
59  
60

1  
2  
3 Our data suggest that MSMO have a higher positivity for syphilis, chlamydia and gonorrhoea  
4 than MSMW; however, the comparison of STI positivity between MSMO and MSMW varies  
5 in published studies. For example, Davis and colleagues (2016) conducted a study among  
6 Chinese MSM showing no differences between MSMW and MSMO in the lifetime  
7 prevalence of syphilis, gonorrhoea, chlamydia and genital warts but a higher prevalence of  
8 genital herpes in MSMW (6.6%) compared to MSMO (0.4%)<sup>20</sup>. In USA, MSMW had a 57%  
9 increased odds of having an STI compared to heterosexuals, but no differences were found  
10 between MSMO and heterosexuals or MSMO and MSMW.<sup>19</sup> Similarly, an Indian study has  
11 shown that there were no differences in any STI positivity (i.e. either syphilis, gonorrhoea or  
12 chlamydia) between MSMO and MSMW.<sup>17</sup> Furthermore, MSMW are also less likely to ever  
13 have an HIV/STI test compared to MSMO,<sup>17,21,22</sup> which is consistent with an Australian  
14 qualitative study suggesting MSMW have a poor sexual health knowledge compared to  
15 MSMO.<sup>23</sup>

16  
17  
18  
19  
20  
21  
22  
23  
24  
25  
26  
27  
28  
29  
30  
31  
32  
33  
34  
35 Our data also show that MSMW are less likely to have RAI with male partners and less likely  
36 to have condomless RAI. These findings may explain the reasons why MSMW have a lower  
37 positivity for anorectal gonorrhoea and chlamydia than MSMO in our study. Importantly, we  
38 did not find any significant differences in urethral gonorrhoea and chlamydia between  
39 MSMO and MSMW despite differences in anal sex and condom use. This may be because  
40 some urethral chlamydial infection in MSMW is acquired from women and that urethral  
41 gonorrhoea is commonly acquired from no anal sexual activity.<sup>24,25</sup> The disparities of HIV  
42 and syphilis positivity between MSMO and MSMW were more pronounced compared to  
43 other gonorrhoea and chlamydia, and there was a striking increase in syphilis positivity in  
44 both groups.

1  
2  
3 With the unique characteristics and sexual practices among MSMW, it is plausible that  
4  
5 MSMW act as a potential bridge for HIV/STI transmission from MSM to heterosexual  
6  
7 population and this concept has been proposed elsewhere.<sup>26–28</sup> MSMW has been considered  
8  
9 as a more vulnerable and hidden population due to the social stigma and self-identity.<sup>11</sup> Some  
10  
11 MSMW may marry a woman to hide their homosexuality particularly in countries due to the  
12  
13 stigma and discrimination against MSM.<sup>11</sup> MSMW may be more likely not to discuss their  
14  
15 sexual health and disclose their sexual orientation with their GPs and hence these men may  
16  
17 not receive the appropriate sexual health care and management. A LGBT-friendly and non-  
18  
19 judgemental approach clinic is essential to build up the trust between clinicians and patients.  
20  
21 Furthermore, the current health promotion and prevention programmes mainly targeting the  
22  
23 MSM population as a whole. It is possible that some hidden MSMW may not be engaged in  
24  
25 the LGBT community and hence they may not be targeted with the current programmes.  
26  
27 Future public health campaigns and prevention programmes should also tailor for MSMW via  
28  
29 different channels.  
30  
31  
32  
33  
34  
35  
36  
37

38 There are a number of limitations in the study that have to be taken into account. First, data  
39  
40 on sexual orientation was not collected. The categorisation of MSMO and MSMW was based  
41  
42 on self-reported sexual practice rather than sexual identity. This means that MSMW in this  
43  
44 study might not define themselves as bisexual men. Second, this study was conducted in one  
45  
46 urban major sexual health clinic. It is possible that MSM attending a sexual health clinic are  
47  
48 more likely to be at increased sexual risk and hence our findings may not be generalizable to  
49  
50 the whole MSM population in Australia or in other settings. Third, we were unable to  
51  
52 examine the temporal trends for gonorrhoea and chlamydia over the 8-year period because  
53  
54 we changed the diagnostic test for gonorrhoea and chlamydia at our clinic in 2015.  
55  
56  
57  
58  
59  
60



## CONCLUSION

MSMW is a heterogeneous group in which the sexual practices and STI positivity vary between MSMW with mainly female partners and MSMW with mainly male partners.

Compared to MSMO, MSMW have overall lower sexual risk practices and lower STI/HIV positivity. In the last years, changes in the sexual practices in MSM have affected both MSMW and MSMO leading to an increased risk of STI in both subgroups. The increase in syphilis positivity among MSMW in concert with a decrease in the use of condoms with casual female partners may have led to rises in the incidence of STIs in the female population. Nevertheless, further studies also including heterosexual men and women are needed to better understand the recent changes in the STI epidemiology.

## ACKNOWLEDGMENTS

The authors would like to acknowledge Afrizal Afrizal for his assistance with data extraction at the Melbourne Sexual Health Centre. EPFC was supported by the Australian National Health and Medical Research Council Early Career Fellowship (GNT1091226).

## AUTHOR DISCLOSURE STATEMENT(S)

None

## CONTRIBUTORS

EPFC and CKF conceived and designed the study. RC conducted some preliminary analyses. MMS performed the literature review, conducted the statistical analysis and wrote the first draft of the manuscript. EPFC provided statistical advice and oversaw the study. All authors assisted with data interpretation, critically revised it for important intellectual content and approved the final version of the manuscript.

**REFERENCES**

1. World Health Organization: Report on Global Sexually Transmitted Infection Surveillance, 2018. Geneva, 2018.
2. Kirkcaldy RD, Weston E, Segurado AC, Hughes G. Epidemiology of gonorrhoea: a global perspective. *Sex Health* 2019;16(5):401-411.
3. Kirby Institute: HIV, viral hepatitis and sexually transmissible infections in Australia: Annual surveillance report 2018. 2018. Sydney, 2018.
4. Needleman R, Chow EPF, Towns JM, et al. Access to sexual health services after the rapid roll out of the launch of pre-exposure prophylaxis for HIV in Melbourne, Australia: A retrospective cross-sectional analysis. *Sex Health* 2018;15(6):528-532.
5. Ryan KE, Mak A, Stoope M, et al. Protocol for an HIV Pre-exposure Prophylaxis (PrEP) Population Level Intervention Study in Victoria Australia: The PrEPX Study. *Front Public Health* 2018;6:151.
6. Newcomb ME, Moran K, Feinstein BA, et al. Pre-Exposure Prophylaxis (PrEP) Use and Condomless Anal Sex: Evidence of Risk Compensation in a Cohort of Young Men Who Have Sex with Men. *J Acquir Immune Defic Syndr* 2018;77(4):358-364.
7. Lal L, Audsley J, Murphy DA, et al. Medication adherence, condom use and sexually transmitted infections in Australian preexposure prophylaxis users. *AIDS* 2017;31(12):1709-1714.
8. Oldenburg CE, Nunn AS, Montgomery M, et al. Behavioral Changes Following Uptake of HIV Pre-exposure Prophylaxis Among Men Who Have Sex with Men in a Clinical Setting. *AIDS Behav* 2018;22(4):1075-1079..
9. Chow EPF, Grulich AE, Fairley CK. Epidemiology and prevention of sexually transmitted infections in men who have sex with men at risk of HIV. *Lancet HIV* 2019;6(6):e396-e405.

10. Mercer CH, Hart GJ, Johnson AM, Cassell JA. Behaviourally bisexual men as a bridge population for HIV and sexually transmitted infections? Evidence from a national probability survey. *Int J STD AIDS* 2009; 20(2):87-94.
11. Chow EPF, Wilson DP, Zhang L. What is the potential for bisexual men in China to act as a bridge of HIV transmission to the female population? Behavioural evidence from a systematic review and meta-analysis. *BMC Infect Dis*. 2011;11(1):242.
12. Cornelisse VJ, Chow EPF, Huffam S, et al. Increased detection of pharyngeal and rectal gonorrhoea in men who have sex with men after transition from culture to nucleic acid amplification testing. *Sex Transm Dis* 2017;44(2):114-117.
13. Templeton D, Read P, Varma R, Bourne C. Australian sexually transmitted infection and HIV testing guidelines for asymptomatic men who have sex with men 2014: A Review of the Evidence. *Sex Health* 2014;11(3):217-229.
14. Ong JJ, Fethers K, Fairley CK, et al. Asymptomatic and symptomatic urethral gonorrhoea in men who have sex with men attending a sexual health service. *Clin Microbiol Infect Dis* 2017;23(8):555-559.
15. Chow EPF, Tomnay J, Fehler G, et al. Substantial increases in chlamydia and gonorrhoea positivity unexplained by changes in individual-level sexual behaviors among men who have sex with men in an Australian sexual health service from 2007 to 2013. *Sex Transm Dis* 2015;42(2):81-87.
16. Friedman MR, Wei C, Klem M Lou, et al. HIV infection and sexual risk among men who have sex with men and women (MSMW): A systematic review and meta-analysis. *PLoS One* 2014;9(1): e87139.
17. Ramakrishnan L, Ramanathan S, Chakrapani V, et al. Comparison of Sexual Risk, HIV/STI Prevalence and Intervention Exposure Among Men Who Have Sex with Men and Women (MSMW) and Men Who Have Sex with Men Only (MSMO) in India:

- 1  
2  
3 Implications for HIV Prevention. *AIDS Behav* 2015;19(12):2255-2269.  
4  
5  
6 18. Jeffries IV WL. Beyond the bisexual bridge: Sexual health among U.S. men who have  
7  
8 sex with men and women. *Am J Prev Med* 2014;47(3):320-329.  
9  
10 19. Dyer T V., Khan MR, Sandoval M, et al. Drug Use and Sexual HIV Transmission Risk  
11  
12 Among Men Who have Sex with Men and Women (MSMW), Men Who have Sex  
13  
14 with Men only (MSMO), and Men Who have Sex with Women Only (MSWO) and the  
15  
16 Female Partners of MSMW and MSWO: A Network Perspective. *AIDS Behav*  
17  
18 2017;21(12):3590-3598.  
19  
20  
21 20. Davis A, Best J, Luo J, et al. Differences in risk behaviours, HIV/STI testing and  
22  
23 HIV/STI prevalence between men who have sex with men and men who have sex with  
24  
25 both men and women in China. *Int J STD AIDS* 2016;27(10):840-849.  
26  
27  
28 21. Jeffries WL. HIV testing among bisexual men in the United States. *AIDS Educ Prev*.  
29  
30 2010;22(4):356-370.  
31  
32  
33 22. Mirandola M, Gios L, Sherriff N, et al. Socio-demographic Characteristics, Sexual and  
34  
35 Test-Seeking Behaviours Amongst Men Who have Sex with Both Men and Women:  
36  
37 Results from a Bio-behavioural Survey in 13 European Cities. *AIDS Behav*  
38  
39 2017;21(10):3013-3025.  
40  
41  
42 23. Smardon T, Vaisey A, Chow EPF, et al. Sexual practices and healthcare use of men  
43  
44 who have sex with men only and men who have sex with men and women – a  
45  
46 Qualitative comparison. 2019 Joint Australasian Sexual Health Conference and the  
47  
48 Australasian HIV&AIDS Conference 2019;Sept 17-19(Perth, WA).  
49  
50  
51 24. Barbee LA, Khosropour CM, Dombrowski JC, et al. An estimate of the proportion of  
52  
53 symptomatic gonococcal, chlamydial and non-gonococcal nonchlamydial urethritis  
54  
55 attributable to oral sex among men who have sex with men: A case-control study. *Sex*  
56  
57 *Transm Infect* 2016;92(2):155-160.  
58  
59  
60

- 1  
2  
3  
4  
5  
6  
7  
8  
9  
10  
11  
12  
13  
14  
15  
16  
17  
18  
19  
20  
21  
22  
23  
24  
25  
26  
27  
28  
29  
30  
31  
32  
33  
34  
35  
36  
37  
38  
39  
40  
41  
42  
43  
44  
45  
46  
47  
48  
49  
50  
51  
52  
53  
54  
55  
56  
57  
58  
59  
60
25. Nash JL, Hocking JS, Read TRH, et al. Contribution of sexual practices (other than anal sex) to bacterial sexually transmitted infection transmission in men who have sex with men: A cross-sectional analysis using electronic health records. *Sex Transm Infect* 2014;90(1):55-57.
  26. Ong JJ, Landika A, Fairley CK, et al. Characteristics, sexual practices and sexually transmissible infections diagnoses of men who have sex with men and use non-occupational HIV post-exposure prophylaxis in Victoria, Australia. *Sex Health* 2016;13(6):555-559.
  27. Williamson DA, Chow EPF, Gorrie CL, et al. Bridging of *Neisseria gonorrhoeae* lineages across sexual networks in the HIV pre-exposure prophylaxis era. *Nat Commun* 2019;10(1):1-10.
  28. Chow EPF, Wilson DP, Zhang L. Estimating HIV incidence among female partners of bisexual men in China. *Int J Infect Dis* 2012;16(5):e312-20.

## FIGURES

**Figure 1** Proportion of condomless anal or vaginal sex with casual sexual partners in past 12 months with casual partners between 2011 and 2018, stratified by men who have sex with men only (MSMO) and men who have sex with men and women (MSMW).

\*For anal sex with male partners and for anal or vaginal sex with female partners, MSM reporting condomless anal sex includes MSM who sometimes, usually or never used a condom with their sexual partners in the past 12 months. MSM: men who have sex with men, MSMO: men who have sex with men only, MSMW: men who have sex with men and women

**Figure 2** Positivity for syphilis and HIV between 2011 and 2018, stratified by men who have sex with men only (MSMO) and men who have sex with men and women (MSMW).

MSMO: men who have sex with men only, MSMW: men who have sex with men and women

1  
2  
3  
4  
5  
6  
7  
8  
9  
10  
11  
12  
13  
14  
15  
16  
17  
18  
19  
20  
21  
22  
23  
24  
25  
26  
27  
28  
29  
30  
31  
32  
33  
34  
35  
36  
37  
38  
39  
40  
41  
42  
43  
44  
45  
46  
47  
48  
49  
50  
51  
52  
53  
54  
55  
56  
57  
58  
59  
60

## TABLES

**Table 1** Demographic characteristics and sexual practices among men who have sex with men, stratified by men who have sex with men only (MSMO) and men who have sex with men and women (MSMW).

|                                                                                  |                                    | Men who<br>have sex with<br>men only<br>(N=13,282)<br>n(%) | Men who<br>have sex<br>with men<br>and women<br>(N=2030)<br>n(%) | P-<br>value |
|----------------------------------------------------------------------------------|------------------------------------|------------------------------------------------------------|------------------------------------------------------------------|-------------|
| Age (years), median(IQR)                                                         |                                    | 27 (23-33)                                                 | 29 (24-38)                                                       | <0.001      |
| Country of birth                                                                 | Australia                          | 6459 (50.5)                                                | 1117 (57.9)                                                      | <0.001      |
|                                                                                  | Overseas                           | 6335 (49.5)                                                | 813 (42.1)                                                       |             |
|                                                                                  | No information                     | 488                                                        | 100                                                              |             |
| Aboriginal and Torres<br>Strait Islander Status                                  | Indigenous origin                  | 158 (1.3)                                                  | 18 (1.0)                                                         | 0.250       |
|                                                                                  | Non-Indigenous origin              | 12037 (98.7)                                               | 1827 (99.0)                                                      |             |
|                                                                                  | No information                     | 1087                                                       | 185                                                              |             |
| Sex overseas past 12<br>months                                                   | Yes                                | 4562 (36.7)                                                | 757 (39.5)                                                       | 0.019       |
|                                                                                  | No                                 | 7854 (63.3)                                                | 1158 (60.5)                                                      |             |
|                                                                                  | No information                     | 866                                                        | 115                                                              |             |
| Ever Sex Worker                                                                  | Yes                                | 77 (0.6)                                                   | 13 (0.6)                                                         | 0.739       |
|                                                                                  | No                                 | 13205 (99.4)                                               | 2017 (99.4)                                                      |             |
| Injected Drug Use past<br>12 months                                              | Yes                                | 221 (1.7)                                                  | 50 (2.5)                                                         | 0.029       |
|                                                                                  | No                                 | 12823 (98.3)                                               | 1939 (97.5)                                                      |             |
|                                                                                  | No information                     | 238                                                        | 41                                                               |             |
| Number of female and male sexual partners in the<br>past 12 months, median (IQR) |                                    | 5 (3-10)                                                   | 6 (4-11)                                                         | <0.001      |
| Number of male sexual partners in the past 12<br>months, median (IQR)            |                                    | 5 (3-10)                                                   | 2 (1-5)                                                          | <0.001      |
| Regular sexual partner                                                           | No regular partner                 | 7807 (59.5)                                                | 1085 (53.5)                                                      | -           |
|                                                                                  | Regular male partner               | 5321 (40.5)                                                | 172 (8.5)                                                        |             |
|                                                                                  | Regular female partner             | NA                                                         | 677 (33.4)                                                       |             |
|                                                                                  | Regular female and male<br>partner | NA                                                         | 93 (4.6)                                                         |             |
|                                                                                  | No information                     | 154                                                        | 3                                                                |             |
| Anal sexual practice<br>with regular male<br>partners <sup>a</sup>               | Receptive only                     | 460 (8.8)                                                  | 15 (5.8)                                                         | 0.070       |
|                                                                                  | Insertive only                     | 477 (9.1)                                                  | 16 (6.2)                                                         |             |
|                                                                                  | Receptive and insertive            | 4067 (77.6)                                                | 219 (84.6)                                                       |             |
|                                                                                  | No anal sex                        | 238 (4.5)                                                  | 9 (3.5)                                                          |             |
|                                                                                  | No information                     | 79                                                         | 6                                                                |             |

|                                                                                                  |                         |             |             |        |
|--------------------------------------------------------------------------------------------------|-------------------------|-------------|-------------|--------|
| Condom use with regular male partners in the past 12 months for receptive anal sex <sup>b*</sup> | Always                  | 1274 (28.1) | 87 (37.2)   | 0.003  |
|                                                                                                  | Not always              | 3253 (71.9) | 147 (62.8)  |        |
| Condom use with regular male partners in the past 12 months for insertive anal sex <sup>c*</sup> | Always                  | 1294 (28.5) | 86 (36.6)   | 0.007  |
|                                                                                                  | Not always              | 3250 (71.5) | 149 (63.4)  |        |
| Vaginal or anal sex with regular female partner <sup>d</sup>                                     | Yes                     | NA          | 744 (98.5)  | -      |
|                                                                                                  | No                      | NA          | 11 (1.5)    |        |
|                                                                                                  | No information          | NA          | 15          |        |
| Condom use with regular female partners in the past 12 months <sup>e*</sup>                      | Always                  | NA          | 136 (18.3)  | -      |
|                                                                                                  | Not always              | NA          | 608 (81.7)  |        |
| Anal sexual practice with casual male partners                                                   | Receptive only          | 1324 (10.5) | 136 (7.0)   | <0.001 |
|                                                                                                  | Insertive only          | 1392 (11.2) | 292 (15.0)  |        |
|                                                                                                  | Receptive and insertive | 8126 (64.5) | 1088 (55.9) |        |
|                                                                                                  | No anal sex             | 1750 (13.9) | 430 (22.1)  |        |
|                                                                                                  | No information          | 690         | 84          |        |
| Condom use with casual male partners in the past 12 months for receptive anal sex <sup>f*</sup>  | Always                  | 4319 (45.7) | 610 (49.8)  | 0.006  |
|                                                                                                  | Not always              | 5131 (54.3) | 614 (50.2)  |        |
| Condom use with casual male partners in the past 12 months for insertive anal sex <sup>g*</sup>  | Always                  | 4395 (46.2) | 665 (48.2)  | 0.161  |
|                                                                                                  | Not always              | 5123 (53.8) | 715 (51.8)  |        |
| Vaginal or anal sex with casual female partner                                                   | Yes                     | NA          | 1730 (96.9) | -      |
|                                                                                                  | No                      | NA          | 56 (3.1)    |        |
|                                                                                                  | No information          | NA          | 244         |        |
| Condom use with casual female partners in the past 12 months <sup>h*</sup>                       | Always                  | NA          | 564 (32.6)  | -      |
|                                                                                                  | Not always              | NA          | 1166 (67.4) |        |

<sup>a</sup>Only including MSM with regular male partners or regular male and female partners,

<sup>b</sup>Only including MSM that referred receptive only or receptive and insertive anal sex with regular male partners, <sup>c</sup>Only including MSM that referred insertive only or receptive and insertive anal sex with regular male partners, <sup>d</sup>Only including MSM with regular female partners or regular male and female partners <sup>e</sup>Only including MSM that referred vaginal or



1  
2  
3 anal sex with regular female partner, <sup>f</sup> Only including MSM that referred receptive only or  
4  
5 receptive and insertive anal sex with casual male partners, <sup>g</sup> Only including MSM that  
6  
7 referred insertive only or receptive and insertive anal sex with casual male partners, <sup>h</sup> Only  
8  
9 including MSM that referred vaginal or anal sex with casual female partners.\*'Not always'  
10  
11 was defined as men who sometimes, usually or never used a condom with their sexual  
12  
13 partners in the past 12 months (with female partners for vaginal or anal sex, with male  
14  
15 partners for anal sex). IQR: Interquartile range, MSM: men who have sex with men  
16  
17  
18  
19  
20  
21  
22  
23  
24  
25  
26  
27  
28  
29  
30  
31  
32  
33  
34  
35  
36  
37  
38  
39  
40  
41  
42  
43  
44  
45  
46  
47  
48  
49  
50  
51  
52  
53  
54  
55  
56  
57  
58  
59  
60

For peer review only

**Table 2** Positivity for gonorrhoea, chlamydia, syphilis and HIV among men who have sex with men, stratified by men who have sex with men only (MSMO) and men who have sex with men and women (MSMW).

| HIV/STI positivity               | Men who have sex with men only | Men who have sex with men and women | P value |
|----------------------------------|--------------------------------|-------------------------------------|---------|
| Gonorrhoea (oropharyngeal)       | 714/12253 (5.8)                | 72/1752 (4.1)                       | 0.003   |
| Gonorrhoea (urethral)*           | 412/12125 (3.4)                | 58/1935 (3.0)                       | 0.208   |
| Gonorrhoea (anorectal)           | 774/11505 (6.7)                | 58/1436 (4.0)                       | <0.001  |
| Gonorrhoea (any anatomical site) | 1384/12399 (11.2)              | 149/1878 (7.9)                      | <0.001  |
| Chlamydia (urethral)             | 425/12125 (3.5)                | 77/1935 (4.0)                       | 0.297   |
| Chlamydia (anorectal)            | 1029/11458 (9.0)               | 85/1436 (5.9)                       | <0.001  |
| Chlamydia (any anatomical site)  | 1322/12325 (10.7)              | 146/1957 (7.5)                      | <0.001  |
| Syphilis                         | 847/11757 (7.2)                | 86/1821 (4.7)                       | <0.001  |
| HIV (new diagnosis)              | 303/11522 (2.6)                | 12/1819 (0.7)                       | <0.001  |
| HIV (previous diagnosis)         | 342/12940 (2.6)                | 7/2023 (0.3)                        | <0.001  |

\*Before 2015, MSM with no urethral symptoms were not tested for urethral gonorrhoea. The number of people tested corresponds to the number of people tested for urethral Chlamydia \*\*Only including HIV cases diagnosed on the day of the first visit.

**Table 3** Association between sexual practice and Gonorrhoea, Chlamydia, Syphilis and HIV positivity among men who have sex with men only and men who have sex with men and women from 2011 to 2018 in Melbourne (Australia)

|                                                |      | OR (95% CI)         | P-value | aOR(95% CI)          | P-value |
|------------------------------------------------|------|---------------------|---------|----------------------|---------|
| <b>Gonorrhoea,<br/>any<br/>anatomical site</b> |      |                     |         |                      |         |
|                                                | MSMO | 1.46 (1.22 to 1.74) | <0.001  | 1.32 (1.11 to 1.58)  | 0.002   |
|                                                | MSMW | 1                   |         | 1                    | ref     |
| <b>Chlamydia,<br/>any<br/>anatomical site</b>  |      |                     |         |                      |         |
|                                                | MSMO | 1.49 (1.25 to 1.78) | <0.001  | 1.38 (1.15 to 1.65)  | <0.001  |
|                                                | MSMW | 1                   |         | 1                    | ref     |
| <b>Syphilis</b>                                |      |                     |         |                      |         |
|                                                | MSMO | 1.57 (1.25 to 1.97) | <0.001  | 1.71 (1.35 to 2.16)  | <0.001  |
|                                                | MSMW | 1                   |         | 1                    | ref     |
| <b>HIV incident *</b>                          |      |                     |         |                      |         |
|                                                | MSMO | 4.07 (2.28 to 7.26) | <0.001  | 4.41 (2.46 to 7.91)  | <0.001  |
|                                                | MSMW | 1                   |         | 1                    | ref     |
| <b>Previous HIV<br/>positive</b>               |      |                     |         |                      |         |
|                                                | MSMO | 7.6 (3.6 to 16.17)  | <0.001  | 9.55 (4.48 to 20.33) | <0.001  |
|                                                | MSMW | 1                   | ref     | 1                    | ref     |

\*Only including HIV cases diagnosed on the day of the first visit. cOR: crude odds ratio, aOR: odds ratio adjusted by age, country of birth, sex overseas, injected drug use in the past 12 months, regular partner, number of male sexual partners in the past 12 months, condom use with casual male partners in the past 12 months and year of visit, MSMO: men who have sex with men only, MSMW: men who have sex with men and women.

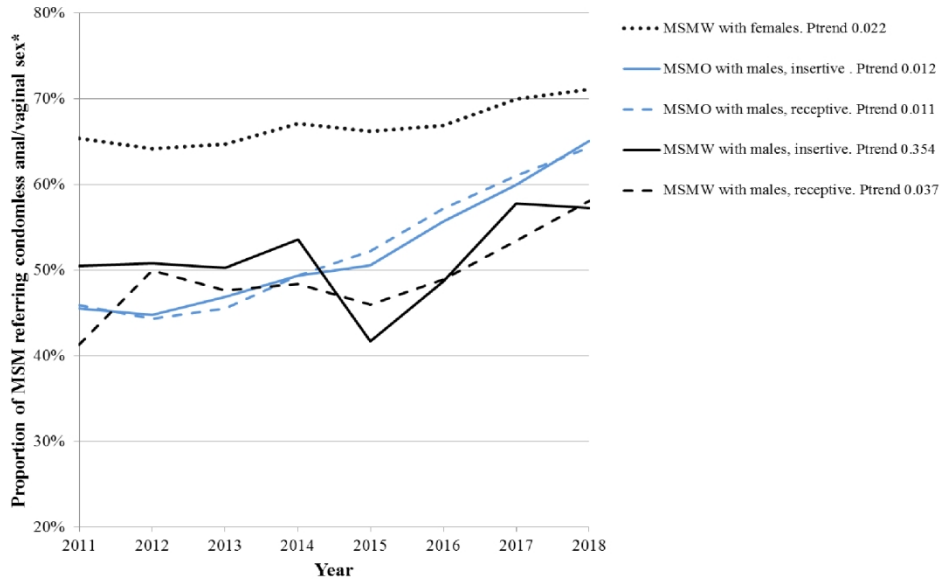

Proportion of condomless anal or vaginal sex with casual sexual partners in past 12 months with casual partners between 2011 and 2018, stratified by men who have sex with men only (MSMO) and men who have sex with men and women (MSMW).

\*For anal sex with male partners and for anal or vaginal sex with female partners, MSM reporting condomless anal sex includes MSM who sometimes, usually or never used a condom with their sexual partners in the past 12 months. MSM: men who have sex with men, MSMO: men who have sex with men only, MSMW: men who have sex with men and women

254x190mm (200 x 200 DPI)

1  
2  
3  
4  
5  
6  
7  
8  
9  
10  
11  
12  
13  
14  
15  
16  
17  
18  
19  
20  
21  
22  
23  
24  
25  
26  
27  
28  
29  
30  
31  
32  
33  
34  
35  
36  
37  
38  
39  
40  
41  
42  
43  
44  
45  
46  
47  
48  
49  
50  
51  
52  
53  
54  
55  
56  
57  
58  
59  
60

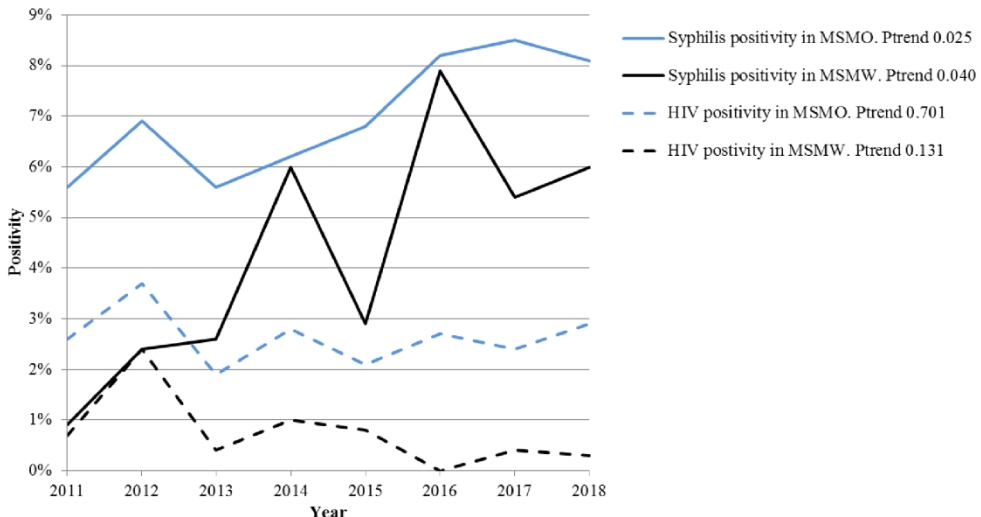

Positivity for syphilis and HIV between 2011 and 2018, stratified by men who have sex with men only (MSMO) and men who have sex with men and women (MSMW).  
MSMO: men who have sex with men only, MSMW: men who have sex with men and women

254x167mm (200 x 200 DPI)

1  
2  
3 **SUPPLEMENTARY MATERIAL**  
4  
5

6 **Trends and differences in sexual practices and sexually transmitted infections in men who have**  
7 **sex with men only (MSMO) and men who have sex with men and women (MSMW) in**  
8 **Melbourne, Australia.**  
9

10  
11 Mario Martín-Sánchez, Richard Case, Christopher K. Fairley, Jane S. Hocking, Catriona S. Bradshaw,  
12 Jason J. Ong, Marcus Y. Chen, Eric P.F. Chow  
13

14 **Table S1** Demographic characteristics and sexual practices among men who have sex with men only  
15 and men who have sex with men and women from 2011 to 2018 in Melbourne (Australia).....2  
16

17 **Table S2** Temporal trend of the sexual practices among men who have sex with men only from 2011  
18 to 2018 in Melbourne (Australia) .....5  
19

20 **Table S3** Temporal trend of the sexual practices among men who have sex with men and women  
21 from 2011 to 2018 in Melbourne (Australia).....6  
22

23 **Table S4** Positivity for gonorrhoea, chlamydia, syphilis and HIV among men who have sex with men  
24 only and men who have sex with men and women from 2011 to 2018 in Melbourne (Australia) .....7  
25

26 **Table S5** Association between sexual practice and Gonorrhoea, Chlamydia, Syphilis and HIV  
27 positivity among men who have sex with men only and men who have sex with men and women from  
28 2011 to 2018 in Melbourne (Australia) .....8  
29

30 **Table S6** Temporal trend of the positivity for sexually transmitted infections and HIV among men  
31 who have sex with men only from 2011 to 2018 in Melbourne (Australia).....9  
32

33 **Table S7** Temporal trend of the positivity for sexually transmitted infections and HIV among men  
34 that have sex with men and women from 2011 to 2018 in Melbourne (Australia) .....10  
35  
36  
37  
38  
39  
40  
41  
42  
43  
44  
45  
46  
47  
48  
49  
50  
51  
52  
53  
54  
55  
56  
57  
58  
59  
60

**Table S1** Demographic characteristics and sexual practices among men who have sex with men only and men who have sex with men and women from 2011 to 2018 in Melbourne (Australia)

|                                                                                                          | MSMO<br>(N=13,282) | MSMW-M<br>(N=828) | MSMW-W<br>(N=859) | Comparison<br>across three<br>groups | Comparison<br>between<br>MSMW-M<br>and MSMW-W |
|----------------------------------------------------------------------------------------------------------|--------------------|-------------------|-------------------|--------------------------------------|-----------------------------------------------|
|                                                                                                          | n (%)              | n (%)             | n (%)             | P-value                              | P-value                                       |
| <b>Age (years), median(IQR)</b>                                                                          | 27 (23-33)         | 29 (24-38)        | 28 (24-36)        | <0.001                               | 0.976                                         |
| <b>Country of birth</b>                                                                                  |                    |                   |                   | <0.001                               | 0.037                                         |
| Australia                                                                                                | 6459 (50.5)        | 478 (61.1)        | 459 (56.0)        |                                      |                                               |
| Overseas                                                                                                 | 6335 (49.5)        | 304 (38.9)        | 361 (44.0)        |                                      |                                               |
| No information                                                                                           | 488                | 46                | 39                |                                      |                                               |
| <b>Indigenous status</b>                                                                                 |                    |                   |                   | 0.244                                | 0.108                                         |
| Indigenous origin                                                                                        | 158 (1.3)          | 11 (1.5)          | 5 (0.6)           |                                      |                                               |
| Non-Indigenous origin                                                                                    | 12037 (98.7)       | 736 (98.5)        | 780 (99.4)        |                                      |                                               |
| No information                                                                                           | 1087               | 81                | 74                |                                      |                                               |
| <b>Sex overseas</b>                                                                                      |                    |                   |                   | <0.001                               | 0.001                                         |
| Yes                                                                                                      | 4562 (36.7)        | 286 (37.1)        | 372 (45.7)        |                                      |                                               |
| No                                                                                                       | 7854 (63.3)        | 484 (62.9)        | 442 (54.3)        |                                      |                                               |
| No information                                                                                           | 866                | 58                | 45                |                                      |                                               |
| <b>Sex work during lifetime</b>                                                                          |                    |                   |                   | 0.587                                | 0.730                                         |
| Yes                                                                                                      | 77 (0.6)           | 7 (0.8)           | 6 (0.7)           |                                      |                                               |
| No                                                                                                       | 13205 (99.4)       | 821 (99.2)        | 853 (99.3)        |                                      |                                               |
| <b>Injected drug use in past 12 months</b>                                                               |                    |                   |                   | 0.005                                | 0.480                                         |
| Yes                                                                                                      | 221 (1.7)          | 25 (3.1)          | 21 (2.5)          |                                      |                                               |
| No                                                                                                       | 12823 (98.3)       | 786 (96.9)        | 816 (97.5)        |                                      |                                               |
| No information                                                                                           | 238                | 17                | 22                |                                      |                                               |
| <b>Number of female and male sexual partners in the past 12 months, median (IQR)</b>                     | 5 (3-10)           | 7 (5-12)          | 6 (4-11)          | <0.001                               | <0.001                                        |
| <b>Number of male sexual partners in the past 12 months, median (IQR)</b>                                | 5 (3-10)           | 5 (3-10)          | 1 (1-2)           | <0.001                               | <0.001                                        |
| <b>Number of female sexual partners in the past 12 months, median (IQR)</b>                              | NA                 | 1 (1-2)           | 5 (3-8)           | NA                                   | <0.001                                        |
| <b>Regular sexual partner</b>                                                                            |                    |                   |                   | NA                                   | <0.001                                        |
| No regular partner                                                                                       | 7807 (59.5)        | 445 (53.8)        | 466 (54.4)        |                                      |                                               |
| Regular male partner                                                                                     | 5321 (40.5)        | 141 (17.0)        | 11 (1.3)          |                                      |                                               |
| Regular female partner                                                                                   | NA                 | 204 (24.7)        | 355 (41.4)        |                                      |                                               |
| Regular female and male partner                                                                          | NA                 | 37 (4.5)          | 25 (2.9)          |                                      |                                               |
| No information                                                                                           | 154                | 1                 | 1                 |                                      |                                               |
| <b>Anal sexual practice with regular male partners<sup>a</sup></b>                                       |                    |                   |                   | 0.275                                | 0.392                                         |
| Receptive only                                                                                           | 460 (8.8)          | 10 (5.6)          | 2 (6.3)           |                                      |                                               |
| Insertive only                                                                                           | 477 (9.1)          | 13 (7.3)          | 0 (0.0)           |                                      |                                               |
| Receptive and insertive                                                                                  | 4067 (77.6)        | 148 (83.6)        | 28 (87.5)         |                                      |                                               |
| No anal sex                                                                                              | 238 (4.5)          | 6 (3.4)           | 2 (6.3)           |                                      |                                               |
| No information                                                                                           | 79                 | 2                 | 5                 |                                      |                                               |
| <b>Condom use with casual regular partners in the past 12 months for receptive anal sex<sup>b*</sup></b> |                    |                   |                   | 0.100                                | 0.241                                         |
| Always                                                                                                   | 1274 (28.1)        | 51 (32.3)         | 13 (43.3)         |                                      |                                               |
| Not always                                                                                               | 3253 (71.9)        | 107 (67.7)        | 17 (56.7)         |                                      |                                               |
| <b>Condom use with casual regular partners in the past 12 months for insertive anal sex<sup>c*</sup></b> |                    |                   |                   | 0.116                                | 0.975                                         |
| Always                                                                                                   | 1294 (28.5)        | 57 (35.4)         | 10 (35.7)         |                                      |                                               |
| Not always                                                                                               | 3250 (71.5)        | 104 (64.6)        | 18 (64.3)         |                                      |                                               |
| <b>Vaginal or anal sex with regular female partner<sup>d</sup></b>                                       |                    |                   |                   | NA                                   | 0.935                                         |
| Yes                                                                                                      | NA                 | 232 (98.3)        | 367 (98.4)        |                                      |                                               |
| No                                                                                                       | NA                 | 4 (1.7)           | 6 (1.6)           |                                      |                                               |
| No information                                                                                           | NA                 | 5                 | 7                 |                                      |                                               |
| <b>Condom use with regular female</b>                                                                    |                    |                   |                   | NA                                   | 0.436                                         |

|                                                                                                       |             |            |            |        |
|-------------------------------------------------------------------------------------------------------|-------------|------------|------------|--------|
| <b>partners in the past 12 months*</b>                                                                |             |            |            |        |
| Always                                                                                                | NA          | 45 (19.4)  | 62 (16.9)  |        |
| Not always                                                                                            | NA          | 187 (80.6) | 305 (83.1) |        |
| <b>Anal sexual practice with casual male partners</b>                                                 |             |            |            |        |
|                                                                                                       |             |            |            | <0.001 |
| Receptive only                                                                                        | 1324 (10.5) | 46 (5.6)   | 68 (8.3)   | <0.001 |
| Insertive only                                                                                        | 1392 (11.2) | 122 (14.9) | 122 (14.9) |        |
| Receptive and insertive                                                                               | 8126 (64.5) | 538 (65.9) | 418 (51.0) |        |
| No anal sex                                                                                           | 1750 (13.9) | 111 (13.6) | 212 (25.9) |        |
| No information                                                                                        | 690         | 11         | 39         |        |
| <b>Condom use with casual male partners in the past 12 months for receptive anal sex<sup>f*</sup></b> |             |            |            |        |
|                                                                                                       |             |            |            | 0.003  |
| Always                                                                                                | 4319 (45.7) | 261 (44.7) | 260 (53.5) |        |
| Not always                                                                                            | 5131 (54.3) | 323 (55.3) | 226 (46.5) |        |
| <b>Condom use with casual male partners in the past 12 months for insertive anal sex<sup>g*</sup></b> |             |            |            |        |
|                                                                                                       |             |            |            | 0.002  |
| Always                                                                                                | 4395 (46.2) | 282 (42.7) | 282 (52.6) |        |
| Not always                                                                                            | 5123 (53.8) | 378 (57.3) | 256 (47.4) |        |
| <b>Vaginal or anal sex with casual female partner</b>                                                 |             |            |            |        |
|                                                                                                       |             |            |            | 0.908  |
| Yes                                                                                                   | NA          | 675 (97.3) | 819 (97.2) |        |
| No                                                                                                    | NA          | 19 (2.7)   | 24 (2.8)   |        |
| No information                                                                                        | NA          | 134        | 16         |        |
| <b>Condom use with casual female partners in the past 12 months<sup>h*</sup></b>                      |             |            |            |        |
|                                                                                                       |             |            |            | <0.001 |
| Always                                                                                                | NA          | 262 (39.0) | 200 (24.4) |        |
| Not always                                                                                            | NA          | 412 (61.0) | 619 (75.6) |        |

<sup>a</sup>Only including MSM with regular male partners or regular male and female partners, <sup>b</sup>Only including MSM that referred receptive only or receptive and insertive anal sex with regular male partners, <sup>c</sup>Only including MSM that referred insertive only or receptive and insertive anal sex with regular male partners, <sup>d</sup>Only including MSM with regular female partners or regular male and female partners <sup>e</sup>Only including MSM that referred vaginal or anal sex with regular female partner, <sup>f</sup> Only including MSM that referred receptive only or receptive and insertive anal sex with casual male partners, <sup>g</sup> Only including MSM that referred insertive only or receptive and insertive anal sex with casual male partners, <sup>h</sup> Only including MSM that referred vaginal or anal sex with casual female partners. \*'Not always' was defined as men who sometimes, usually or never used a condom with their sexual partners in the past 12 months (with female partners for vaginal or anal sex, with male partners for anal sex). IQR: Interquartile range, MSM: men who have sex with men, MSMO: men who have sex with men only, MSMW-W: men who have sex with men and women and had more female than male sexual partner in the past 12 months, MSMW-M: men who have sex with men and women and had more male than female sexual partner in the past 12 months



**Table S2** Temporal trend of the sexual practices among men who have sex with men only from 2011 to 2018 in Melbourne (Australia)

|                                                                                           | 2011 |       | 2012 |       | 2013 |       | 2014 |       | 2015 |       | 2016 |       | 2017 |       | 2018 |       | 2011-18<br>P <sub>trend</sub> |
|-------------------------------------------------------------------------------------------|------|-------|------|-------|------|-------|------|-------|------|-------|------|-------|------|-------|------|-------|-------------------------------|
|                                                                                           | n    | %     | n    | %     | n    | %     | n    | %     | n    | %     | n    | %     | n    | %     | n    | %     |                               |
| <b>Number of sexual partners in the past 12 months</b>                                    |      |       |      |       |      |       |      |       |      |       |      |       |      |       |      |       |                               |
| <5                                                                                        | 527  | 49.6% | 610  | 46.7% | 655  | 45.3% | 640  | 43.6% | 700  | 41.2% | 832  | 42.8% | 923  | 44.3% | 986  | 43.4% | 0.052                         |
| 5+                                                                                        | 536  | 50.4% | 695  | 53.3% | 792  | 54.7% | 828  | 56.4% | 999  | 58.8% | 1113 | 57.2% | 1160 | 55.7% | 1286 | 56.6% | -                             |
| <b>Condom use with regular male partners in the past 12 months*</b>                       |      |       |      |       |      |       |      |       |      |       |      |       |      |       |      |       |                               |
| Always                                                                                    | 137  | 30.9% | 167  | 31.2% | 163  | 30.1% | 143  | 25.9% | 169  | 27.1% | 204  | 27.9% | 151  | 19.7% | 174  | 21.5% | 0.020                         |
| Not always                                                                                | 307  | 69.1% | 368  | 68.8% | 378  | 69.9% | 410  | 74.1% | 454  | 72.9% | 528  | 72.1% | 615  | 80.3% | 636  | 78.5% | -                             |
| <b>Anal sexual practice with casual male partners</b>                                     |      |       |      |       |      |       |      |       |      |       |      |       |      |       |      |       |                               |
| Receptive only                                                                            | 76   | 7.6%  | 113  | 9.2%  | 110  | 8.1%  | 143  | 10.3% | 153  | 9.4%  | 204  | 11.0% | 236  | 11.9% | 289  | 13.4% | 0.014                         |
| Insertive only                                                                            | 99   | 9.9%  | 136  | 11.1% | 156  | 11.5% | 151  | 10.9% | 184  | 11.4% | 212  | 11.5% | 204  | 10.3% | 250  | 11.6% | 0.336                         |
| Receptive and insertive                                                                   | 640  | 64.2% | 760  | 62.1% | 860  | 63.2% | 904  | 65.0% | 1078 | 66.5% | 1219 | 66.0% | 1301 | 65.4% | 1364 | 63.1% | 0.360                         |
| No anal sex                                                                               | 182  | 18.3% | 214  | 17.5% | 235  | 17.3% | 193  | 13.9% | 206  | 12.7% | 212  | 11.5% | 248  | 12.5% | 260  | 12.0% | 0.015                         |
| <b>Condom use with casual male partners in the past 12 months for receptive anal sex*</b> |      |       |      |       |      |       |      |       |      |       |      |       |      |       |      |       |                               |
| Always                                                                                    | 387  | 54.1% | 486  | 55.7% | 529  | 54.5% | 530  | 50.6% | 589  | 47.8% | 609  | 42.8% | 599  | 39.0% | 590  | 35.7% | 0.011                         |
| Not always                                                                                | 329  | 45.9% | 387  | 44.3% | 441  | 45.5% | 517  | 49.4% | 642  | 52.2% | 814  | 57.2% | 938  | 61.0% | 1063 | 64.3% | -                             |
| <b>Condom use with casual male partners in the past 12 months for insertive anal sex*</b> |      |       |      |       |      |       |      |       |      |       |      |       |      |       |      |       |                               |
| Always                                                                                    | 403  | 54.5% | 495  | 55.2% | 540  | 53.1% | 534  | 50.6% | 623  | 49.4% | 634  | 44.3% | 602  | 40.0% | 564  | 34.9% | 0.012                         |
| Not always                                                                                | 336  | 45.5% | 401  | 44.8% | 476  | 46.9% | 521  | 49.4% | 639  | 50.6% | 797  | 55.7% | 903  | 60.0% | 1050 | 65.1% | -                             |

\* 'Not always' was defined as men who sometimes, usually or never used a condom for anal sex in the past 12 months

**Table S3** Temporal trend of the sexual practices among men who have sex with men and women from 2011 to 2018 in Melbourne (Australia)

|                                                                                           | 2011 |       | 2012 |       | 2013 |       | 2014 |       | 2015 |       | 2016 |       | 2017 |       | 2018 |       | 2011-18<br>P <sub>trend</sub> |
|-------------------------------------------------------------------------------------------|------|-------|------|-------|------|-------|------|-------|------|-------|------|-------|------|-------|------|-------|-------------------------------|
|                                                                                           | n    | %     | n    | %     | n    | %     | n    | %     | n    | %     | n    | %     | n    | %     | n    | %     |                               |
| <b>Number of sexual partners past 12 months</b>                                           |      |       |      |       |      |       |      |       |      |       |      |       |      |       |      |       |                               |
| <5                                                                                        | 62   | 36.9% | 67   | 36.8% | 97   | 39.4% | 84   | 35.0% | 94   | 36.2% | 93   | 31.8% | 99   | 33.1% | 100  | 29.2% | 0.026                         |
| 5+                                                                                        | 106  | 63.1% | 115  | 63.2% | 149  | 60.6% | 156  | 65.0% | 166  | 63.8% | 199  | 68.2% | 200  | 66.9% | 243  | 70.8% |                               |
| <b>Number of male sexual partners past 12 months</b>                                      |      |       |      |       |      |       |      |       |      |       |      |       |      |       |      |       |                               |
| <5                                                                                        | 122  | 72.6% | 131  | 72.0% | 176  | 71.5% | 170  | 70.8% | 196  | 75.4% | 208  | 71.2% | 209  | 6     | 222  | 64.7% | 0.113                         |
| 5+                                                                                        | 46   | 27.4% | 51   | 28.0% | 70   | 28.5% | 70   | 29.2% | 64   | 24.6% | 84   | 28.8% | 90   | 30.1% | 121  | 35.3% |                               |
| <b>Number of female sexual partners past 12 months</b>                                    |      |       |      |       |      |       |      |       |      |       |      |       |      |       |      |       |                               |
| <5                                                                                        | 129  | 76.8% | 135  | 74.2% | 190  | 77.2% | 183  | 76.3% | 187  | 71.9% | 209  | 71.6% | 216  | 72.2% | 239  | 69.7% | 0.026                         |
| 5+                                                                                        | 39   | 23.2% | 47   | 25.8% | 56   | 22.8% | 57   | 23.8% | 73   | 28.1% | 83   | 28.4% | 83   | 27.8% | 104  | 30.3% |                               |
| <b>Condom use with regular male partners in the past 12 months*</b>                       |      |       |      |       |      |       |      |       |      |       |      |       |      |       |      |       |                               |
| Always                                                                                    | 11   | 45.8% | 5    | 21.7% | 14   | 41.2% | 13   | 38.2% | 9    | 37.5% | 9    | 28.1% | 10   | 25.6% | 15   | 37.5% | 0.467                         |
| Not always                                                                                | 13   | 54.2% | 18   | 78.3% | 20   | 58.8% | 21   | 61.8% | 15   | 62.5% | 23   | 71.9% | 29   | 74.4% | 25   | 62.5% |                               |
| <b>Anal sexual practice with casual male partners</b>                                     |      |       |      |       |      |       |      |       |      |       |      |       |      |       |      |       |                               |
| Receptive only                                                                            | 6    | 3.8%  | 12   | 6.8%  | 15   | 6.5%  | 14   | 6.0%  | 17   | 6.9%  | 26   | 9.2%  | 16   | 5.5%  | 30   | 9.2%  | 0.084                         |
| Insertive only                                                                            | 19   | 11.9% | 26   | 14.8% | 33   | 14.2% | 27   | 11.5% | 42   | 17.1% | 45   | 15.9% | 44   | 15.2% | 56   | 17.1% | 0.072                         |
| Receptive and insertive                                                                   | 86   | 54.1% | 96   | 54.5% | 132  | 56.9% | 139  | 59.4% | 133  | 54.1% | 150  | 53.0% | 160  | 55.4% | 192  | 58.7% | 0.520                         |
| No anal sex                                                                               | 48   | 30.2% | 42   | 23.9% | 52   | 22.4% | 54   | 23.1% | 54   | 22.0% | 62   | 21.9% | 69   | 23.9% | 49   | 15.0% | 0.042                         |
| <b>Condom use with casual male partners in the past 12 months for receptive anal sex*</b> |      |       |      |       |      |       |      |       |      |       |      |       |      |       |      |       |                               |
| Always                                                                                    | 54   | 58.7% | 54   | 50.0% | 77   | 52.4% | 79   | 51.6% | 81   | 54.0% | 90   | 51.1% | 82   | 46.6% | 93   | 41.9% | 0.037                         |
| Not always                                                                                | 38   | 41.3% | 54   | 50.0% | 70   | 47.6% | 74   | 48.4% | 69   | 46.0% | 86   | 48.9% | 94   | 53.4% | 129  | 58.1% |                               |
| <b>Condom use with casual male partners in the past 12 months for insertive anal sex*</b> |      |       |      |       |      |       |      |       |      |       |      |       |      |       |      |       |                               |
| Always                                                                                    | 52   | 49.5% | 60   | 49.2% | 82   | 49.7% | 77   | 46.4% | 102  | 58.3% | 100  | 51.3% | 86   | 42.2% | 106  | 42.7% | 0.354                         |
| Not always                                                                                | 53   | 50.5% | 62   | 50.8% | 83   | 50.3% | 89   | 53.6% | 73   | 41.7% | 95   | 48.7% | 118  | 57.8% | 142  | 57.3% |                               |
| <b>Condom use with regular female partners in the past 12 months*</b>                     |      |       |      |       |      |       |      |       |      |       |      |       |      |       |      |       |                               |
| Always                                                                                    | 16   | 22.5% | 17   | 23.3% | 8    | 9.9%  | 10   | 13.0% | 17   | 18.9% | 24   | 19.2% | 20   | 19.0% | 24   | 19.7% | 0.901                         |
| Not always                                                                                | 55   | 77.5% | 56   | 76.7% | 73   | 90.1% | 67   | 87.0% | 73   | 81.1% | 101  | 80.8% | 85   | 81.0% | 98   | 80.3% |                               |
| <b>Condom use with casual female partners in the past 12 months*</b>                      |      |       |      |       |      |       |      |       |      |       |      |       |      |       |      |       |                               |
| Always                                                                                    | 46   | 34.6% | 54   | 35.8% | 76   | 35.3% | 68   | 32.9% | 75   | 33.8% | 84   | 33.1% | 77   | 30.0% | 84   | 28.9% | 0.022                         |
| Not always                                                                                | 87   | 65.4% | 97   | 64.2% | 139  | 64.7% | 139  | 67.1% | 147  | 66.2% | 170  | 66.9% | 180  | 70.0% | 207  | 71.1% |                               |

\* 'Not always' was defined as men who sometimes, usually or never used a condom with their sexual partners in the past 12 months (with female partners for vaginal or anal sex, with male partners for anal sex).

**Table S4** Positivity for gonorrhoea, chlamydia, syphilis and HIV among men who have sex with men only and men who have sex with men and women from 2011 to 2018 in Melbourne (Australia)

|                              | <b>MSMO</b>       | <b>MSMW-M</b>  | <b>MSMW-W</b>  | <b>Comparison across three groups</b> | <b>Comparison between MSMW-M and MSM-W</b> |
|------------------------------|-------------------|----------------|----------------|---------------------------------------|--------------------------------------------|
|                              | <i>n/N (%)</i>    | <i>n/N (%)</i> | <i>n/N (%)</i> | P-value                               | P-value                                    |
| <b>Gonorrhoea</b>            |                   |                |                |                                       |                                            |
| Any anatomical site          | 1384/12399 (11.2) | 87/794 (11.0)  | 49/775 (6.3)   | <0.001                                | 0.001                                      |
| Oropharynx                   | 714/12253 (5.8)   | 46/776 (5.9)   | 19/689 (2.7)   | 0.003                                 | 0.001                                      |
| Urethra                      | 412/12125 (3.4)   | 27/794 (3.4)   | 26/821 (3.2)   | 0.877                                 | 0.799                                      |
| Rectum                       | 774/11505 (6.7)   | 40/699 (5.7)   | 14/528 (2.7)   | 0.001                                 | 0.009                                      |
| <b>Chlamydia</b>             |                   |                |                |                                       |                                            |
| Any anatomical site          | 1322/12325 (10.7) | 77/802 (9.6)   | 51/832 (6.1)   | <0.001                                | 0.009                                      |
| Urethra                      | 425/12125 (3.5)   | 29/794 (3.7)   | 39/821 (4.8)   | 0.178                                 | 0.272                                      |
| Rectum                       | 1029/11458 (9.0)  | 57/700 (8.1)   | 17/527 (3.2)   | <0.001                                | <0.001                                     |
| <b>Syphilis</b>              | 847/11757 (7.2)   | 38/761 (5.0)   | 26/762 (3.4)   | <0.001                                | 0.124                                      |
| <b>HIV incident**</b>        | 303/11522 (2.6)   | 9/760 (1.2)    | 3/739 (0.4)    | <0.001                                | 0.091                                      |
| <b>Previous HIV positive</b> | 342/13282 (2.6)   | 6/828 (0.7)    | 1/859 (0.1)    | <0.001                                | 0.052                                      |

\*Before 2015, MSM with no urethral symptoms were not tested for urethral gonorrhoea. The number of people tested corresponds to the number of people teste for urethral Chlamydia \*\*Only including HIV cases diagnosed on the day of the first visit. MSMO: men who have sex with men only, MSMW-M: men who have sex with men and women and had more male than female sexual partner in the past 12 months, MSMW-W: men who have sex with men and women and had more female than male sexual partner in the past 12 months, MSMW-M: men who have sex with men and women and had more male than female sexual partner in the past 12 months

**Table S5** Association between sexual practice and Gonorrhoea, Chlamydia, Syphilis and HIV positivity among men who have sex with men only and men who have sex with men and women from 2011 to 2018 in Melbourne (Australia)

|                                        | <b>cOR (95% CI)</b>    | <b>P value</b> | <b>aOR (95%CI)</b>     | <b>P value</b> |
|----------------------------------------|------------------------|----------------|------------------------|----------------|
| <b>Gonorrhoea, any anatomical site</b> |                        |                |                        |                |
| MSMO                                   | 1.86 (1.39 to 2.50)    | <0.001         | 1.48 (1.09 to 2.01)    | 0.012          |
| MSMW-M                                 | 1.82 (1.27 to 2.63)    | 0.001          | 1.34 (0.91 to 1.98)    | 0.142          |
| MSMW-W                                 | 1                      | ref            | 1                      | ref            |
| <b>Chlamydia, any anatomical site</b>  |                        |                |                        |                |
| MSMO                                   | 1.84 (1.38 to 2.46)    | <0.001         | 1.46 (1.08 to 1.96)    | 0.014          |
| MSMW-M                                 | 1.63 (1.13 to 2.35)    | 0.010          | 1.16 (0.78 to 1.71)    | 0.464          |
| MSMW-W                                 | 1                      | ref            | 1                      | ref            |
| <b>Syphilis</b>                        |                        |                |                        |                |
| MSMO                                   | 2.20 (1.48 to 3.27)    | <0.001         | 2.10 (1.37 to 3.23)    | 0.001          |
| MSMW-M                                 | 1.49 (0.89 to 2.48)    | 0.126          | 1.11 (0.63 to 1.95)    | 0.723          |
| MSMW-W                                 | 1                      | ref            | 1                      | ref            |
| <b>HIV*</b>                            |                        |                |                        |                |
| MSMO                                   | 6.88 (2.20 to 21.50)   | 0.001          | 6.32 (2.01 to 19.90)   | 0.002          |
| MSMW-M                                 | 3.05 (0.82 to 11.32)   | 0.095          | 1.85 (0.44 to 7.81)    | 0.404          |
| MSMW-W                                 | 1                      | ref            | 1                      | ref            |
| <b>Previous HIV positive</b>           |                        |                |                        |                |
| MSMO                                   | 22.68 (3.18 to 161.64) | 0.002          | 18.48 (2.58 to 132.46) | 0.004          |
| MSMW-M                                 | 6.26 (0.76 to 52.13)   | 0.090          | 4.09 (0.47 to 35.34)   | 0.201          |
| MSMW-W                                 | 1                      | ref            | 1                      | ref            |

\*Only including HIV cases diagnosed on the day of the first visit. cOR: crude odds ratio, aOR: odds ratio adjusted by age, country of birth, sex overseas, injected drug use in the past 12 months, regular partner, number of male sexual partners in the past 12 months, condom use with casual male partners in the past 12 months and year of visit, MSMO: men who have sex with men only, MSMW-M: men who have sex with men and women and had more male than female sexual partner in the past 12 months, MSMW-W: men who have sex with men and women and had more female than male sexual partner in the past 12 months, MSMW-M: men who have sex with men and women and had more male than female sexual partner in the past 12 months.

**Table S6** Temporal trend of the positivity for sexually transmitted infections and HIV among men who have sex with men only from 2011 to 2018 in Melbourne (Australia)

|                       | 2011                 | 2012                 | 2013                 | 2014                 | 2015                 | 2016                 | 2017                 | 2018                 | 2011-2014          | 2015-2018          | 2011-2018          |
|-----------------------|----------------------|----------------------|----------------------|----------------------|----------------------|----------------------|----------------------|----------------------|--------------------|--------------------|--------------------|
|                       | n/N <sup>†</sup> (%) | P <sub>trend</sub> | P <sub>trend</sub> | P <sub>trend</sub> |
| <b>Gonorrhoea</b>     |                      |                      |                      |                      |                      |                      |                      |                      |                    |                    |                    |
| Any anatomical site   | 66/1002<br>(6.6)     | 81/1195<br>(6.8)     | 124/1347<br>(9.2)    | 139/1381<br>(10.1)   | 233/1592<br>(14.6)   | 228/1805<br>(12.6)   | 256/1962<br>(13.0)   | 257/2115<br>(12.2)   | 0.099              | 0.144              | NA                 |
| Oropharynx            | 18/989<br>(1.8)      | 28/1181<br>(2.4)     | 44/1330<br>(3.3)     | 44/1372<br>(3.2)     | 127/1579<br>(8.0)    | 134/1773<br>(7.6)    | 166/1937<br>(8.6)    | 153/2092<br>(7.3)    | 0.108              | 0.636              | NA                 |
| Urethra*              | 38/975<br>(3.9)      | 36/1170<br>(3.1)     | 47/1312<br>(3.6)     | 47/1356<br>(3.5)     | 66/1560<br>(4.2)     | 56/1755<br>(3.2)     | 65/1915<br>(3.4)     | 57/2082<br>(2.7)     | 0.594              | 0.123              | NA                 |
| Rectum                | 25/937<br>(2.7)      | 42/1098<br>(3.8)     | 71/1229<br>(5.8)     | 74/1291<br>(5.7)     | 136/1470<br>(9.3)    | 122/1651<br>(7.4)    | 137/1818<br>(7.5)    | 167/2011<br>(8.3)    | 0.102              | 0.480              | NA                 |
| <b>Chlamydia</b>      |                      |                      |                      |                      |                      |                      |                      |                      |                    |                    |                    |
| Any anatomical site   | 89/1005<br>(8.9)     | 117/1194<br>(9.8)    | 142/1347<br>(10.5)   | 133/1380<br>(9.6)    | 179/1574<br>(11.4)   | 206/1786<br>(11.5)   | 213/1941<br>(11.0)   | 243/2098<br>(11.6)   | 0.318              | 0.955              | NA                 |
| Urethra               | 31/975<br>(3.2)      | 43/1170<br>(3.7)     | 48/1312<br>(3.7)     | 41/1356<br>(3.0)     | 69/1560<br>(4.4)     | 66/1755<br>(3.8)     | 55/1915<br>(2.9)     | 72/2082<br>(3.5)     | 0.745              | 0.190              | NA                 |
| Rectum                | 65/937<br>(6.9)      | 83/1097<br>(7.6)     | 108/1230<br>(8.8)    | 101/1284<br>(7.9)    | 127/1442<br>(8.8)    | 170/1649<br>(10.3)   | 175/1813<br>(9.7)    | 200/2006<br>(10.0)   | 0.243              | 0.325              | NA                 |
| <b>Syphilis</b>       | 44/792<br>(5.6)      | 79/1148<br>(6.9)     | 73/1312<br>(5.6)     | 83/1346<br>(6.2)     | 105/1552<br>(6.8)    | 143/1740<br>(8.2)    | 155/1832<br>(8.5)    | 165/2035<br>(8.1)    | -                  | -                  | 0.025              |
| <b>HIV incident**</b> | 24/914<br>(2.6)      | 41/1111<br>(3.7)     | 24/1272<br>(1.9)     | 37/1300<br>(2.8)     | 32/1516<br>(2.1)     | 45/1670<br>(2.7)     | 43/1771<br>(2.4)     | 57/1968<br>(2.9)     | -                  | -                  | 0.701              |

\*Before 2015, MSM with no urethral symptoms were not tested for urethral gonorrhoea. The number of people tested corresponds to the number of people teste for urethral Chlamydia

\*\*Only including HIV cases diagnosed on the day of the first visit

†The denominator corresponds to the number of MSM tested NA, not applicable

**Table S7** Temporal trend of the positivity for sexually transmitted infections and HIV among men that have sex with men and women from 2011 to 2018 in Melbourne (Australia)

|                       | 2011                 | 2012                 | 2013                 | 2014                 | 2015                 | 2016                 | 2017                 | 2018                 | 2011-2014          | 2015-2018          | 2011-2018          |
|-----------------------|----------------------|----------------------|----------------------|----------------------|----------------------|----------------------|----------------------|----------------------|--------------------|--------------------|--------------------|
|                       | n/N <sup>†</sup> (%) | P <sub>trend</sub> | P <sub>trend</sub> | P <sub>trend</sub> |
| <b>Gonorrhoea</b>     |                      |                      |                      |                      |                      |                      |                      |                      |                    |                    |                    |
| Any anatomical site   | 7/153<br>(4.6)       | 9/160<br>(5.6)       | 15/225<br>(6.7)      | 15/218<br>(6.9)      | 21/232<br>(9.1)      | 30/267<br>(11.2)     | 30/293<br>(10.2)     | 22/330<br>(6.7)      | 0.093              | 0.354              | NA                 |
| Oropharynx            | 1/150<br>(0.7)       | 2/155<br>(1.3)       | 7/211<br>(3.3)       | 3/214<br>(1.4)       | 14/222<br>(6.3)      | 14/243<br>(5.8)      | 19/258<br>(7.4)      | 12/299<br>(4.0)      | 0.409              | 0.400              | NA                 |
| Urethra*              | 3/163<br>(1.8)       | 5/173<br>(2.9)       | 9/235<br>(3.8)       | 8/224<br>(3.6)       | 8/249<br>(3.2)       | 11/277<br>(4.0)      | 9/288<br>(3.1)       | 5/326<br>(1.5)       | 0.134              | 0.195              | NA                 |
| Rectum                | 4/128<br>(3.1)       | 5/122<br>(4.1)       | 4/175<br>(2.3)       | 4/176<br>(2.3)       | 6/175<br>(3.4)       | 14/194<br>(7.2)      | 12/214<br>(5.6)      | 9/252<br>(3.6)       | 0.259              | 0.884              | NA                 |
| <b>Chlamydia</b>      |                      |                      |                      |                      |                      |                      |                      |                      |                    |                    |                    |
| Any anatomical site   | 14/165<br>(8.5)      | 15/174<br>(8.6)      | 17/238<br>(7.1)      | 10/232<br>(4.3)      | 19/251<br>(7.6)      | 23/279<br>(8.2)      | 18/290<br>(6.2)      | 30/328<br>(9.1)      | 0.118              | 0.627              | NA                 |
| Urethra               | 4/163<br>(2.5)       | 11/173<br>(6.4)      | 12/235<br>(5.1)      | 6/224<br>(2.7)       | 10/249<br>(4.0)      | 14/277<br>(5.1)      | 6/288<br>(2.1)       | 14/326<br>(4.3)      | 0.946              | 0.706              | NA                 |
| Rectum                | 10/128<br>(7.8)      | 9/122<br>(7.4)       | 6/176<br>(3.4)       | 4/176<br>(2.3)       | 10/175<br>(5.7)      | 11/194<br>(5.7)      | 15/213<br>(7.0)      | 20/252<br>(7.9)      | 0.099              | 0.102              | NA                 |
| <b>Syphilis</b>       | 1/112<br>(0.9)       | 4/168<br>(2.4)       | 6/228<br>(2.6)       | 13/215<br>(6.0)      | 7/240<br>(2.9)       | 21/265<br>(7.9)      | 15/277<br>(5.4)      | 19/316<br>(6.0)      | -                  | -                  | 0.040              |
| <b>HIV incident**</b> | 1/140<br>(0.7)       | 4/168<br>(2.4)       | 1/227<br>(0.4)       | 2/209<br>(1.0)       | 2/239<br>(0.8)       | 0/258<br>(0.0)       | 1/268<br>(0.4)       | 1/310<br>(0.3)       | -                  | -                  | 0.131              |

\*Before 2015, MSM with no urethral symptoms were not tested for urethral gonorrhoea. The number of people tested corresponds to the number of people teste for urethral Chlamydia \*\*Only including HIV cases diagnosed on the day of the first visit. †The denominator corresponds to the number of MSM tested. NA, not applicable

STROBE Statement—checklist of items that should be included in reports of observational studies

|                      | <b>Item No.</b> | <b>Recommendation</b>                                                                                                                                                                         | <b>Page No.</b> | <b>Relevant text from manuscript</b>                                                                                                                                                                                                                                                                                                                                                          |
|----------------------|-----------------|-----------------------------------------------------------------------------------------------------------------------------------------------------------------------------------------------|-----------------|-----------------------------------------------------------------------------------------------------------------------------------------------------------------------------------------------------------------------------------------------------------------------------------------------------------------------------------------------------------------------------------------------|
| Title and abstract   | 1               | (a) Indicate the study’s design with a commonly used term in the title or the abstract<br>(b) Provide in the abstract an informative and balanced summary of what was done and what was found | 2               | cross-sectional study<br>We examined the annual trends of sexual practices and HIV/STI positivity and assessed its association with sexual practice using logistic regression                                                                                                                                                                                                                 |
| <b>Introduction</b>  |                 |                                                                                                                                                                                               |                 |                                                                                                                                                                                                                                                                                                                                                                                               |
| Background/rationale | 2               | Explain the scientific background and rationale for the investigation being reported                                                                                                          | 4               | The cause for the recent rise in gonorrhoea and syphilis in heterosexuals remains unclear,6–9 but a few epidemiological and genomics studies have proposed that bisexual MSM (or men who have sex with men and women) may act as a potential bridging population for STI transmission from MSM to the broader heterosexual population and hence contribute to the rise in STI in heterosexual |
| Objectives           | 3               | State specific objectives, including any prespecified hypotheses                                                                                                                              | 4               | In this study, we aimed to compare the demographic characteristics and sexual practices, and describe the trends in HIV/STI positivity in men who have sex with men only (MSMO) and men who have sex with men and women (MSMW) attending a large sexual health clinic in Melbourne between 2011 and 2018.                                                                                     |
| <b>Methods</b>       |                 |                                                                                                                                                                                               |                 |                                                                                                                                                                                                                                                                                                                                                                                               |

For peer review only

|                           |    |                                                                                                                                                                                                                                                                                                                                                                                                                                                                                                                                                                                                                                                              |         |                                                                                                                                                                                                                                                                 |
|---------------------------|----|--------------------------------------------------------------------------------------------------------------------------------------------------------------------------------------------------------------------------------------------------------------------------------------------------------------------------------------------------------------------------------------------------------------------------------------------------------------------------------------------------------------------------------------------------------------------------------------------------------------------------------------------------------------|---------|-----------------------------------------------------------------------------------------------------------------------------------------------------------------------------------------------------------------------------------------------------------------|
| Study design              | 4  | Present key elements of study design early in the paper                                                                                                                                                                                                                                                                                                                                                                                                                                                                                                                                                                                                      | 5       | We conducted a repeated cross-sectional analysis of retrospective data of MSM attending the Melbourne Sexual Health Centre (MSHC), Australia, between 2011 and 2018                                                                                             |
| Setting                   | 5  | Describe the setting, locations, and relevant dates, including periods of recruitment, exposure, follow-up, and data collection                                                                                                                                                                                                                                                                                                                                                                                                                                                                                                                              | 5       | We conducted a repeated cross-sectional analysis of retrospective data of MSM attending the Melbourne Sexual Health Centre (MSHC), Australia, between 2011 and 2018                                                                                             |
| Participants              | 6  | (a) Cohort study—Give the eligibility criteria, and the sources and methods of selection of participants. Describe methods of follow-up<br>Case-control study—Give the eligibility criteria, and the sources and methods of case ascertainment and control selection. Give the rationale for the choice of cases and controls<br>Cross-sectional study—Give the eligibility criteria, and the sources and methods of selection of participants<br><br>(b) Cohort study—For matched studies, give matching criteria and number of exposed and unexposed<br>Case-control study—For matched studies, give matching criteria and the number of controls per case | 5       | Clients who were male, aged 18 years and above, reported having sex with another man in the past 12 months, and attended MSHC for the first time between 2011 and 2018 were included in this analysis                                                           |
| Variables                 | 7  | Clearly define all outcomes, exposures, predictors, potential confounders, and effect modifiers. Give diagnostic criteria, if applicable                                                                                                                                                                                                                                                                                                                                                                                                                                                                                                                     | 5 and 6 | We categorised MSM into two main categories based on their self-reported sexual practices: (1) men who have sex with men only (MSMO), and (2) men who have sex with men and women (MSMW). (...)                                                                 |
| Data sources/ measurement | 8* | For each variable of interest, give sources of data and details of methods of assessment (measurement). Describe comparability of assessment methods if there is more than one group                                                                                                                                                                                                                                                                                                                                                                                                                                                                         | 5 and 6 | Upon arrival, all clients are invited to complete a questionnaire via computer-assisted self-interviewing (CASI), which collects client's demographic characteristics (e.g. age, country of birth, Aboriginal and Torres Strait Islander [ATSI] status), sexual |



1  
2  
3  
4  
5  
6  
7  
8  
9  
10  
11  
12  
13  
14  
15  
16  
17  
18  
19  
20  
21  
22  
23  
24  
25  
26  
27  
28  
29  
30  
31  
32  
33  
34  
35  
36  
37  
38  
39  
40  
41  
42  
43  
44  
45  
46

|            |    |                                                           |   |                                                                                                                                                                                                                                                                                                                                                                                                                                                             |
|------------|----|-----------------------------------------------------------|---|-------------------------------------------------------------------------------------------------------------------------------------------------------------------------------------------------------------------------------------------------------------------------------------------------------------------------------------------------------------------------------------------------------------------------------------------------------------|
|            |    |                                                           |   | practices (i.e. gender of partners, type of partners [regular or casual], number of partners, condom use and anal sex practice [receptive anal intercourse (RAI) and insertive anal intercourse (IAI)], sex work and injecting drug use behaviour                                                                                                                                                                                                           |
| Bias       | 9  | Describe any efforts to address potential sources of bias | 6 | (...)since July 2015, all MSM were screened for urethral gonorrhoea and chlamydia regardless of the presence of symptoms as per our clinic policy. <sup>14</sup> Therefore, the positivity for urethral gonorrhoea was calculated as the number of men tested positive divided by the number of men who were tested or urethral chlamydia to avoid the bias of testing urethral gonorrhoea among symptomatic MSM, and this approach was also used elsewhere |
| Study size | 10 | Explain how the study size was arrived at                 | - | Not applicable, all cases were included                                                                                                                                                                                                                                                                                                                                                                                                                     |

Continued on next page

For peer review only

|    |                        |     |                                                                                                                                                                                                   |   |                                                                                                                                                                                                                                                                                                                                                                                                                                                 |
|----|------------------------|-----|---------------------------------------------------------------------------------------------------------------------------------------------------------------------------------------------------|---|-------------------------------------------------------------------------------------------------------------------------------------------------------------------------------------------------------------------------------------------------------------------------------------------------------------------------------------------------------------------------------------------------------------------------------------------------|
| 1  |                        |     |                                                                                                                                                                                                   |   |                                                                                                                                                                                                                                                                                                                                                                                                                                                 |
| 2  | Quantitative variables | 11  | Explain how quantitative variables were handled in the analyses. If applicable, describe which groupings were chosen and why                                                                      | - | Not applicable                                                                                                                                                                                                                                                                                                                                                                                                                                  |
| 3  |                        |     |                                                                                                                                                                                                   |   |                                                                                                                                                                                                                                                                                                                                                                                                                                                 |
| 4  | Statistical methods    | 12  | (a) Describe all statistical methods, including those used to control for confounding                                                                                                             | 7 | we assessed the association between sexual practices and STI/HIV positivity using univariable and multivariable logistic regression and reporting the crude odds ratio (OR) and adjusted odds ratio (aOR), and their respective 95% confidence intervals (CI). We fitted a model including the year of the visit and all potential confounding factors (i.e., variables with P<0.20 in the univariable analyses) in the multivariable analysis. |
| 5  |                        |     |                                                                                                                                                                                                   |   |                                                                                                                                                                                                                                                                                                                                                                                                                                                 |
| 6  |                        |     |                                                                                                                                                                                                   |   |                                                                                                                                                                                                                                                                                                                                                                                                                                                 |
| 7  |                        |     |                                                                                                                                                                                                   |   |                                                                                                                                                                                                                                                                                                                                                                                                                                                 |
| 8  |                        |     |                                                                                                                                                                                                   |   |                                                                                                                                                                                                                                                                                                                                                                                                                                                 |
| 9  |                        |     | (b) Describe any methods used to examine subgroups and interactions                                                                                                                               | 7 | For chlamydia and gonorrhoea positivity, we calculated the annual trends for 2011-2014 and 2015-2018 separately due to the change of the diagnostic assays                                                                                                                                                                                                                                                                                      |
| 10 |                        |     |                                                                                                                                                                                                   |   |                                                                                                                                                                                                                                                                                                                                                                                                                                                 |
| 11 |                        |     | (c) Explain how missing data were addressed                                                                                                                                                       | 7 |                                                                                                                                                                                                                                                                                                                                                                                                                                                 |
| 12 |                        |     | (d) Cohort study—If applicable, explain how loss to follow-up was addressed                                                                                                                       | - | Not applicable                                                                                                                                                                                                                                                                                                                                                                                                                                  |
| 13 |                        |     | Case-control study—If applicable, explain how matching of cases and controls was addressed                                                                                                        |   |                                                                                                                                                                                                                                                                                                                                                                                                                                                 |
| 14 |                        |     | Cross-sectional study—If applicable, describe analytical methods taking account of sampling strategy                                                                                              |   |                                                                                                                                                                                                                                                                                                                                                                                                                                                 |
| 15 |                        |     | (e) Describe any sensitivity analyses                                                                                                                                                             | - | Not applicable                                                                                                                                                                                                                                                                                                                                                                                                                                  |
| 16 |                        |     |                                                                                                                                                                                                   |   |                                                                                                                                                                                                                                                                                                                                                                                                                                                 |
| 17 |                        |     |                                                                                                                                                                                                   |   |                                                                                                                                                                                                                                                                                                                                                                                                                                                 |
| 18 |                        |     |                                                                                                                                                                                                   |   |                                                                                                                                                                                                                                                                                                                                                                                                                                                 |
| 19 |                        |     |                                                                                                                                                                                                   |   |                                                                                                                                                                                                                                                                                                                                                                                                                                                 |
| 20 |                        |     |                                                                                                                                                                                                   |   |                                                                                                                                                                                                                                                                                                                                                                                                                                                 |
| 21 |                        |     |                                                                                                                                                                                                   |   |                                                                                                                                                                                                                                                                                                                                                                                                                                                 |
| 22 |                        |     |                                                                                                                                                                                                   |   |                                                                                                                                                                                                                                                                                                                                                                                                                                                 |
| 23 | Results                |     |                                                                                                                                                                                                   |   |                                                                                                                                                                                                                                                                                                                                                                                                                                                 |
| 24 | Participants           | 13* | (a) Report numbers of individuals at each stage of study—eg numbers potentially eligible, examined for eligibility, confirmed eligible, included in the study, completing follow-up, and analysed | 7 | There were 18,851 MSM attending MSHC for the first time between 2011 and 2018. We excluded 1,909 MSM (10.1%) who had had sexual contact with another man but declined to report the number of male sexual partners and 1,630 MSM (8.6%) who reported no male sexual partner in the past 12 months at the current visit but had previously reported male partners at the clinic.                                                                 |
| 25 |                        |     |                                                                                                                                                                                                   |   |                                                                                                                                                                                                                                                                                                                                                                                                                                                 |
| 26 |                        |     |                                                                                                                                                                                                   |   |                                                                                                                                                                                                                                                                                                                                                                                                                                                 |
| 27 |                        |     |                                                                                                                                                                                                   |   |                                                                                                                                                                                                                                                                                                                                                                                                                                                 |
| 28 |                        |     |                                                                                                                                                                                                   |   |                                                                                                                                                                                                                                                                                                                                                                                                                                                 |
| 29 |                        |     |                                                                                                                                                                                                   |   |                                                                                                                                                                                                                                                                                                                                                                                                                                                 |
| 30 |                        |     |                                                                                                                                                                                                   |   |                                                                                                                                                                                                                                                                                                                                                                                                                                                 |
| 31 |                        |     |                                                                                                                                                                                                   |   |                                                                                                                                                                                                                                                                                                                                                                                                                                                 |
| 32 |                        |     |                                                                                                                                                                                                   |   |                                                                                                                                                                                                                                                                                                                                                                                                                                                 |
| 33 |                        |     |                                                                                                                                                                                                   |   |                                                                                                                                                                                                                                                                                                                                                                                                                                                 |
| 34 |                        |     |                                                                                                                                                                                                   |   |                                                                                                                                                                                                                                                                                                                                                                                                                                                 |
| 35 |                        |     |                                                                                                                                                                                                   |   |                                                                                                                                                                                                                                                                                                                                                                                                                                                 |
| 36 |                        |     |                                                                                                                                                                                                   |   |                                                                                                                                                                                                                                                                                                                                                                                                                                                 |
| 37 |                        |     |                                                                                                                                                                                                   |   |                                                                                                                                                                                                                                                                                                                                                                                                                                                 |
| 38 |                        |     |                                                                                                                                                                                                   |   |                                                                                                                                                                                                                                                                                                                                                                                                                                                 |
| 39 |                        |     |                                                                                                                                                                                                   |   |                                                                                                                                                                                                                                                                                                                                                                                                                                                 |
| 40 |                        |     |                                                                                                                                                                                                   |   |                                                                                                                                                                                                                                                                                                                                                                                                                                                 |
| 41 |                        |     |                                                                                                                                                                                                   |   |                                                                                                                                                                                                                                                                                                                                                                                                                                                 |
| 42 |                        |     |                                                                                                                                                                                                   |   |                                                                                                                                                                                                                                                                                                                                                                                                                                                 |
| 43 |                        |     |                                                                                                                                                                                                   |   |                                                                                                                                                                                                                                                                                                                                                                                                                                                 |
| 44 |                        |     |                                                                                                                                                                                                   |   |                                                                                                                                                                                                                                                                                                                                                                                                                                                 |
| 45 |                        |     |                                                                                                                                                                                                   |   |                                                                                                                                                                                                                                                                                                                                                                                                                                                 |
| 46 |                        |     |                                                                                                                                                                                                   |   |                                                                                                                                                                                                                                                                                                                                                                                                                                                 |

|                  |     |                                                                                                                                                                                                              |                   |                                                                                                                                                                                                                                                                                                                                                                                                                    |
|------------------|-----|--------------------------------------------------------------------------------------------------------------------------------------------------------------------------------------------------------------|-------------------|--------------------------------------------------------------------------------------------------------------------------------------------------------------------------------------------------------------------------------------------------------------------------------------------------------------------------------------------------------------------------------------------------------------------|
|                  |     | (b) Give reasons for non-participation at each stage                                                                                                                                                         | 7                 | There were 18,851 MSM attending MSHC for the first time between 2011 and 2018. We excluded 1,909 MSM (10.1%) who had had sexual contact with another man but declined to report the number of male sexual partners and 1,630 MSM (8.6%) who reported no male sexual partner in the past 12 months at the current visit but had previously reported male partners at the clinic.                                    |
|                  |     | (c) Consider use of a flow diagram                                                                                                                                                                           | -                 | -                                                                                                                                                                                                                                                                                                                                                                                                                  |
| Descriptive data | 14* | (a) Give characteristics of study participants (eg demographic, clinical, social) and information on exposures and potential confounders                                                                     | 8                 | Of the 15,312 MSM, the median age was 27 years (interquartile range, IQR: 23-33) but MSMW were slightly older than MSMO (median age: 29 versus 27; $p<0.001$ ) (Table 1). The proportion of men born in Australia was higher in MSMW than in MSMO (57.9% versus 50.5%, $p<0.001$ ).                                                                                                                                |
|                  |     | (b) Indicate number of participants with missing data for each variable of interest                                                                                                                          | 20-21             | Table 1                                                                                                                                                                                                                                                                                                                                                                                                            |
|                  |     | (c) Cohort study—Summarise follow-up time (eg, average and total amount)                                                                                                                                     | -                 | Not applicable                                                                                                                                                                                                                                                                                                                                                                                                     |
| Outcome data     | 15* | Cohort study—Report numbers of outcome events or summary measures over time                                                                                                                                  | -                 | Not applicable                                                                                                                                                                                                                                                                                                                                                                                                     |
|                  |     | Case-control study—Report numbers in each exposure category, or summary measures of exposure                                                                                                                 | -                 | Not applicable                                                                                                                                                                                                                                                                                                                                                                                                     |
|                  |     | Cross-sectional study—Report numbers of outcome events or summary measures                                                                                                                                   | 8-10, Table 2     |                                                                                                                                                                                                                                                                                                                                                                                                                    |
| Main results     | 16  | (a) Give unadjusted estimates and, if applicable, confounder-adjusted estimates and their precision (eg, 95% confidence interval). Make clear which confounders were adjusted for and why they were included | Table 3, Table S5 | After adjusting for other potential confounding factors, MSMO had higher odds of testing positive for gonorrhoea at any anatomical site (aOR 1.32, 95% CI 1.11 to 1.58), chlamydia at any anatomical site (aOR 1.38; 95% CI 1.15 to 1.65), syphilis (aOR 1.71, 95% CI 1.35 to 2.16) and HIV (aOR 4.41, 95% CI 2.46 to 7.91) compared to MSMW (Table 3). Additionally, MSMO had higher odds of testing positive for |

gonorrhoea at any anatomical site (aOR 1.48; 95% CI 1.09 to 2.01), chlamydia at any anatomical site (aOR 1.46; 95% CI 1.08 to 1.96), syphilis (aOR 2.10, 95% CI 1.37 to 3.23), and HIV (aOR 6.32, 95% CI 2.01 to 19.90) compared with MSMW-W in the adjusted analysis; however, there was no significant difference in HIV/STI positivity between MSMW-M and MSMW-W in the adjusted analysis (Table S5).

|                                                                                                                  |   |                |
|------------------------------------------------------------------------------------------------------------------|---|----------------|
| (b) Report category boundaries when continuous variables were categorized                                        | - | Not applicable |
| (c) If relevant, consider translating estimates of relative risk into absolute risk for a meaningful time period | - | Not relevant   |

Continued on next page

|    |                   |    |                                                                                                                                                                            |                  |                                                                                                                                                                                                                                                                                                                                                                       |
|----|-------------------|----|----------------------------------------------------------------------------------------------------------------------------------------------------------------------------|------------------|-----------------------------------------------------------------------------------------------------------------------------------------------------------------------------------------------------------------------------------------------------------------------------------------------------------------------------------------------------------------------|
| 1  |                   |    |                                                                                                                                                                            |                  |                                                                                                                                                                                                                                                                                                                                                                       |
| 2  | Other analyses    | 17 | Report other analyses done—eg analyses of subgroups and interactions, and sensitivity analyses                                                                             | 10, Table S6, S7 | There was a 44.6% increase in syphilis positivity from 5.6% in 2011 to 8.1% in 2018 (Ptrend =0.025) in MSMO and more than a six-fold increase in syphilis positivity from 0.9% in 2011 to 6.0% in 2018 (Ptrend =0.040) in MSMW. HIV positivity did not change in both groups between 2011 and 2018 (Table S6-S7).                                                     |
| 3  |                   |    |                                                                                                                                                                            |                  |                                                                                                                                                                                                                                                                                                                                                                       |
| 4  |                   |    |                                                                                                                                                                            |                  |                                                                                                                                                                                                                                                                                                                                                                       |
| 5  |                   |    |                                                                                                                                                                            |                  |                                                                                                                                                                                                                                                                                                                                                                       |
| 6  |                   |    |                                                                                                                                                                            |                  |                                                                                                                                                                                                                                                                                                                                                                       |
| 7  |                   |    |                                                                                                                                                                            |                  |                                                                                                                                                                                                                                                                                                                                                                       |
| 8  |                   |    |                                                                                                                                                                            |                  |                                                                                                                                                                                                                                                                                                                                                                       |
| 9  |                   |    |                                                                                                                                                                            |                  |                                                                                                                                                                                                                                                                                                                                                                       |
| 10 |                   |    |                                                                                                                                                                            |                  |                                                                                                                                                                                                                                                                                                                                                                       |
| 11 |                   |    |                                                                                                                                                                            |                  |                                                                                                                                                                                                                                                                                                                                                                       |
| 12 |                   |    |                                                                                                                                                                            |                  |                                                                                                                                                                                                                                                                                                                                                                       |
| 13 | <b>Discussion</b> |    |                                                                                                                                                                            |                  |                                                                                                                                                                                                                                                                                                                                                                       |
| 14 | Key results       | 18 | Summarise key results with reference to study objectives                                                                                                                   | 11               | we found that there were significant changes in sexual practices among bisexual men over the period in which rates of STIs had been increasing in heterosexual men and women. Specifically, we found that condomless anal sex with casual male partners and condomless anal sex with female partners had increased in bisexual men as had the positivity for syphilis |
| 15 |                   |    |                                                                                                                                                                            |                  |                                                                                                                                                                                                                                                                                                                                                                       |
| 16 |                   |    |                                                                                                                                                                            |                  |                                                                                                                                                                                                                                                                                                                                                                       |
| 17 |                   |    |                                                                                                                                                                            |                  |                                                                                                                                                                                                                                                                                                                                                                       |
| 18 |                   |    |                                                                                                                                                                            |                  |                                                                                                                                                                                                                                                                                                                                                                       |
| 19 |                   |    |                                                                                                                                                                            |                  |                                                                                                                                                                                                                                                                                                                                                                       |
| 20 |                   |    |                                                                                                                                                                            |                  |                                                                                                                                                                                                                                                                                                                                                                       |
| 21 |                   |    |                                                                                                                                                                            |                  |                                                                                                                                                                                                                                                                                                                                                                       |
| 22 |                   |    |                                                                                                                                                                            |                  |                                                                                                                                                                                                                                                                                                                                                                       |
| 23 |                   |    |                                                                                                                                                                            |                  |                                                                                                                                                                                                                                                                                                                                                                       |
| 24 | Limitations       | 19 | Discuss limitations of the study, taking into account sources of potential bias or imprecision. Discuss both direction and magnitude of any potential bias                 | 13               | There are a number of limitations in the study that have to be taken into account. (...)                                                                                                                                                                                                                                                                              |
| 25 |                   |    |                                                                                                                                                                            |                  |                                                                                                                                                                                                                                                                                                                                                                       |
| 26 |                   |    |                                                                                                                                                                            |                  |                                                                                                                                                                                                                                                                                                                                                                       |
| 27 | Interpretation    | 20 | Give a cautious overall interpretation of results considering objectives, limitations, multiplicity of analyses, results from similar studies, and other relevant evidence | 11-12            | Our data suggest that MSMO have a higher positivity for syphilis, chlamydia and gonorrhoea than MSMW; however, the comparison of STI positivity between MSMO and MSMW varies in published studies. (...)                                                                                                                                                              |
| 28 |                   |    |                                                                                                                                                                            |                  |                                                                                                                                                                                                                                                                                                                                                                       |
| 29 |                   |    |                                                                                                                                                                            |                  |                                                                                                                                                                                                                                                                                                                                                                       |
| 30 |                   |    |                                                                                                                                                                            |                  |                                                                                                                                                                                                                                                                                                                                                                       |
| 31 |                   |    |                                                                                                                                                                            |                  |                                                                                                                                                                                                                                                                                                                                                                       |
| 32 |                   |    |                                                                                                                                                                            |                  |                                                                                                                                                                                                                                                                                                                                                                       |
| 33 |                   |    |                                                                                                                                                                            |                  |                                                                                                                                                                                                                                                                                                                                                                       |
| 34 | Generalisability  | 21 | Discuss the generalisability (external validity) of the study results                                                                                                      | 13               | this study was conducted in one urban major sexual health clinic. It is possible that MSM attending a sexual health clinic are more likely to be at increased sexual risk and hence our findings may not be generalizable to the whole MSM                                                                                                                            |
| 35 |                   |    |                                                                                                                                                                            |                  |                                                                                                                                                                                                                                                                                                                                                                       |
| 36 |                   |    |                                                                                                                                                                            |                  |                                                                                                                                                                                                                                                                                                                                                                       |
| 37 |                   |    |                                                                                                                                                                            |                  |                                                                                                                                                                                                                                                                                                                                                                       |
| 38 |                   |    |                                                                                                                                                                            |                  |                                                                                                                                                                                                                                                                                                                                                                       |
| 39 |                   |    |                                                                                                                                                                            |                  |                                                                                                                                                                                                                                                                                                                                                                       |
| 40 |                   |    |                                                                                                                                                                            |                  |                                                                                                                                                                                                                                                                                                                                                                       |
| 41 |                   |    |                                                                                                                                                                            |                  |                                                                                                                                                                                                                                                                                                                                                                       |
| 42 |                   |    |                                                                                                                                                                            |                  |                                                                                                                                                                                                                                                                                                                                                                       |
| 43 |                   |    |                                                                                                                                                                            |                  |                                                                                                                                                                                                                                                                                                                                                                       |
| 44 |                   |    |                                                                                                                                                                            |                  |                                                                                                                                                                                                                                                                                                                                                                       |
| 45 |                   |    |                                                                                                                                                                            |                  |                                                                                                                                                                                                                                                                                                                                                                       |
| 46 |                   |    |                                                                                                                                                                            |                  |                                                                                                                                                                                                                                                                                                                                                                       |

|                          |    |                                                                                                                                                               |    |                                              |
|--------------------------|----|---------------------------------------------------------------------------------------------------------------------------------------------------------------|----|----------------------------------------------|
|                          |    |                                                                                                                                                               |    | population in Australia or in other settings |
| <b>Other information</b> |    |                                                                                                                                                               |    |                                              |
| Funding                  | 22 | Give the source of funding and the role of the funders for the present study and, if applicable, for the original study on which the present article is based | 14 | AUTHOR DISCLOSURE STATEMENT(S)<br>None       |

\*Give information separately for cases and controls in case-control studies and, if applicable, for exposed and unexposed groups in cohort and cross-sectional studies.

**Note:** An Explanation and Elaboration article discusses each checklist item and gives methodological background and published examples of transparent reporting. The STROBE checklist is best used in conjunction with this article (freely available on the Web sites of PLoS Medicine at <http://www.plosmedicine.org/>, Annals of Internal Medicine at <http://www.annals.org/>, and Epidemiology at <http://www.epidem.com/>). Information on the STROBE Initiative is available at [www.strobe-statement.org](http://www.strobe-statement.org).

# BMJ Open

**Trends and differences in sexual practices and sexually transmitted infections in men who have sex with men only (MSMO) and men who have sex with men and women (MSMW): a repeated cross-sectional study in Melbourne, Australia**

|                                 |                                                                                                                                                                                                                                                                                                                                                                                                                                                                                                                                                                                                                                                                  |
|---------------------------------|------------------------------------------------------------------------------------------------------------------------------------------------------------------------------------------------------------------------------------------------------------------------------------------------------------------------------------------------------------------------------------------------------------------------------------------------------------------------------------------------------------------------------------------------------------------------------------------------------------------------------------------------------------------|
| Journal:                        | <i>BMJ Open</i>                                                                                                                                                                                                                                                                                                                                                                                                                                                                                                                                                                                                                                                  |
| Manuscript ID                   | bmjopen-2020-037608.R1                                                                                                                                                                                                                                                                                                                                                                                                                                                                                                                                                                                                                                           |
| Article Type:                   | Original research                                                                                                                                                                                                                                                                                                                                                                                                                                                                                                                                                                                                                                                |
| Date Submitted by the Author:   | 28-Jul-2020                                                                                                                                                                                                                                                                                                                                                                                                                                                                                                                                                                                                                                                      |
| Complete List of Authors:       | Martin-Sanchez, Mario; Melbourne Sexual Health Centre; Preventive Medicine and Public Health Training Unit PSMar-UPF-ASPB , Case, Richard; Melbourne Sexual Health Centre<br>Fairley, Christopher; Melbourne Sexual Health Centre; Monash University Central Clinical School<br>Hocking, Jane; University of Melbourne, Melbourne School of Population and Global Health<br>Bradshaw, Catriona; Melbourne Sexual Health Centre<br>Ong, Jason; Melbourne Sexual Health Centre; Monash University Central Clinical School<br>Chen, Marcus; Melbourne Sexual Health Centre<br>Chow, Eric; Melbourne Sexual Health Centre; Monash University Central Clinical School |
| <b>Primary Subject Heading</b>: | Sexual health                                                                                                                                                                                                                                                                                                                                                                                                                                                                                                                                                                                                                                                    |
| Secondary Subject Heading:      | Epidemiology, Infectious diseases, HIV/AIDS                                                                                                                                                                                                                                                                                                                                                                                                                                                                                                                                                                                                                      |
| Keywords:                       | SEXUAL MEDICINE, Epidemiology < INFECTIOUS DISEASES, Public health < INFECTIOUS DISEASES, HIV & AIDS < INFECTIOUS DISEASES                                                                                                                                                                                                                                                                                                                                                                                                                                                                                                                                       |
|                                 |                                                                                                                                                                                                                                                                                                                                                                                                                                                                                                                                                                                                                                                                  |

SCHOLARONE™  
Manuscripts

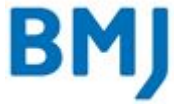

I, the Submitting Author has the right to grant and does grant on behalf of all authors of the Work (as defined in the below author licence), an exclusive licence and/or a non-exclusive licence for contributions from authors who are: i) UK Crown employees; ii) where BMJ has agreed a CC-BY licence shall apply, and/or iii) in accordance with the terms applicable for US Federal Government officers or employees acting as part of their official duties; on a worldwide, perpetual, irrevocable, royalty-free basis to BMJ Publishing Group Ltd ("BMJ") its licensees and where the relevant Journal is co-owned by BMJ to the co-owners of the Journal, to publish the Work in this journal and any other BMJ products and to exploit all rights, as set out in our [licence](#).

The Submitting Author accepts and understands that any supply made under these terms is made by BMJ to the Submitting Author unless you are acting as an employee on behalf of your employer or a postgraduate student of an affiliated institution which is paying any applicable article publishing charge ("APC") for Open Access articles. Where the Submitting Author wishes to make the Work available on an Open Access basis (and intends to pay the relevant APC), the terms of reuse of such Open Access shall be governed by a Creative Commons licence – details of these licences and which [Creative Commons](#) licence will apply to this Work are set out in our licence referred to above.

Other than as permitted in any relevant BMJ Author's Self Archiving Policies, I confirm this Work has not been accepted for publication elsewhere, is not being considered for publication elsewhere and does not duplicate material already published. I confirm all authors consent to publication of this Work and authorise the granting of this licence.



1  
2  
3 **Trends and differences in sexual practices and sexually transmitted infections in men**  
4 **who have sex with men only (MSMO) and men who have sex with men and women**  
5 **(MSMW): a repeated cross-sectional study in Melbourne, Australia**  
6  
7  
8  
9

10 Mario Martín-Sánchez,<sup>1,2</sup> Richard Case,<sup>1</sup> Christopher K. Fairley,<sup>1,3</sup> Jane S. Hocking,<sup>4</sup>  
11  
12 Catriona S. Bradshaw,<sup>1,3</sup> Jason J. Ong,<sup>1,3</sup> Marcus Y. Chen,<sup>1,3</sup> Eric P.F. Chow<sup>1,3,4</sup>  
13  
14

- 15 1. Melbourne Sexual Health Centre, Alfred Health, Melbourne, Victoria, Australia
- 16 2. Preventive Medicine and Public Health Training Unit PSMar-UPF-ASPB, Barcelona,  
17 Spain
- 18 3. Central Clinical School, Monash University, Melbourne, Victoria, Australia
- 19 4. Melbourne School of Population and Global Health, The University of Melbourne,  
20 Carlton, Victoria, Australia
- 21
- 22
- 23
- 24
- 25
- 26

27 **Email:**

28  
29 MMS: [mario.martin04@estudiant.upf.edu](mailto:mario.martin04@estudiant.upf.edu)

30  
31 RC: [r.case@student.unimelb.edu.au](mailto:r.case@student.unimelb.edu.au)

32  
33 CKF: [cfairley@mshc.org.au](mailto:cfairley@mshc.org.au)

34  
35 JSH: [j.hocking@unimelb.edu.au](mailto:j.hocking@unimelb.edu.au)

36  
37 CSB: [Catriona.bradshaw@monash.edu](mailto:Catriona.bradshaw@monash.edu)

38  
39 JJO: [jong@mshc.org.au](mailto:jong@mshc.org.au)

40  
41 MYC: [mchen@mshc.org.au](mailto:mchen@mshc.org.au)

42  
43 EPFC: [eric.chow@monash.edu](mailto:eric.chow@monash.edu)  
44  
45  
46  
47  
48  
49  
50  
51  
52  
53  
54  
55  
56  
57  
58  
59  
60

1  
2  
3 **Address for correspondence:**  
4

5 Associate Professor Eric P.F. Chow, PhD, MPH.

6 Melbourne Sexual Health Centre, 580 Swanston Street, Carlton, VIC 3053, Australia,  
7

8 Phone: +61 (3) 9341-6233, email: [eric.chow@monash.edu](mailto:eric.chow@monash.edu)  
9

10  
11  
12 *Or*  
13

14  
15 Dr Mario Martín-Sánchez, MBBS, MPH.

16  
17 Public Health Agency of Barcelona, Pl. Lesseps 1, 08023, Barcelona, Spain.

18  
19 Phone: +34 932 384 545, email: [mario.martin04@estudiant.upf.edu](mailto:mario.martin04@estudiant.upf.edu)  
20

21  
22 **Keywords:** Bisexuality, bisexual, gay, homosexual, female, sexual behaviours, men who  
23 have sex with men, Sexually Transmitted Diseases, HIV, Syphilis, gonorrhoea, chlamydia,  
24 bisexual, condom  
25  
26  
27  
28  
29  
30  
31  
32  
33  
34  
35  
36  
37  
38  
39  
40  
41  
42  
43  
44  
45  
46  
47  
48  
49  
50  
51  
52  
53  
54  
55  
56  
57  
58  
59  
60

## ABSTRACT

### Objectives

In the last decade, there has been an increase in sexually transmitted infections (STI) in men who have sex with men (MSM) in Australia, and since 2015 also in urban heterosexuals. Men who have sex with men and women (MSMW) have characteristics that may differ from both MSM only (MSMO) and heterosexual men. We aimed to compare the sexual practices and the trends in HIV/STI positivity between MSMO and MSMW.

### Methods

We conducted a repeated cross-sectional study using data from MSM attending the Melbourne Sexual Health Centre, Australia, between 2011 and 2018. We examined the annual trends of sexual practices and HIV/STI positivity and assessed its association with sexual practice (MSMO versus MSMW) using logistic regression.

### Results

Compared to MSMW ( $N=1,979$ ), MSMO ( $N=12,795$ ) were more likely to practice anal sex and to have condomless receptive anal sex with casual male partners, and less likely to have a current regular relationship. Over the 8-year period, there was an increase in condomless receptive anal sex with casual male partners for both groups (MSMO: 46.2% to 63.3%,  $P_{\text{trend}} < 0.001$ ; MSMW: 41.3% to 57.9%,  $P_{\text{trend}} = 0.011$ ). Syphilis positivity increased in MSMO (5.5% to 7.8%,  $P_{\text{trend}} = 0.012$ ) and MSMW (from 0.9% to 6.4%,  $P_{\text{trend}} = 0.004$ ), and HIV remained stable. Gonorrhoea increased among MSMO from 2011 to 2014 (from 6.7% to 9.6%,  $P_{\text{trend}} = 0.002$ ), and remained stable from 2015 to 2018. MSMO had higher odds of testing positive for gonorrhoea (adjusted odd ratio [aOR] 1.36, 95% confidence interval [CI] 1.13 to 1.64), chlamydia (aOR 1.39, 95%CI 1.16 to 1.67), syphilis (aOR 1.74, 95% CI 1.37 to 2.22) and HIV (aOR 4.60, 95%CI 2.43 to 8.70) than MSMW.

### Conclusion

1  
2  
3 MSMW have overall lower condomless sex and lower HIV/STI positivity. In the last years,  
4  
5 changes in sexual practices in MSM have affected both MSMW and MSMO leading to an  
6  
7 increased risk of STI.  
8  
9  
10  
11  
12  
13  
14  
15  
16  
17  
18  
19  
20  
21  
22  
23  
24  
25  
26  
27  
28  
29  
30  
31  
32  
33  
34  
35  
36  
37  
38  
39  
40  
41  
42  
43  
44  
45  
46  
47  
48  
49  
50  
51  
52  
53  
54  
55  
56  
57  
58  
59  
60

For peer review only

## ARTICLE SUMMARY

### Strengths and limitations of this study

- We compared sexual practices and HIV/sexually transmitted infections positivity in a high number of men who have sex with men only (N=12,795) and men who have sex with men and women (N=1,979) over an 8-year period.
- We provide a comprehensive description of sexual practices distinguishing between condom use with regular or casual sexual partners, and in receptive or insertive anal sex.
- The study was conducted in one urban major sexual health clinic and it is possible that our findings may not be generalizable to other settings.
- We were unable to analyse the statistical significance of the temporal trends during the whole study period for gonorrhoea and chlamydia due to a change in the diagnostic test in 2015.

## INTRODUCTION

Despite considerable public health efforts and biomedical advances,<sup>1</sup> the rate of sexually transmitted infections (STIs) is increasing at an alarming rate particularly among gay, bisexual and other men who have sex with men (MSM) worldwide.<sup>2</sup> Among the Australian population, there was an 80% increase in the notification rate of gonorrhoea (from 65.5 to 118.0 per 100,000), a 14% increase in chlamydia (from 364.5 to 416.8 per 100,000) and more than a two-fold increase in syphilis (from 7.8 to 18.3 per 100,000) between 2013 and 2017.<sup>3</sup> In males, most of the early rises in gonorrhoea and syphilis were accounted for by rises in MSM. However, in late 2010s, there has been a dramatic increase in both infections in the Australian heterosexual population to levels not seen since the 1980's. In stark contrast to the rise in the notification rate of gonorrhoea and syphilis, there has been an 11% decline in the HIV notification rate from 4.5 per 100,000 in 2013 to 4.0 in 2017 among MSM in Australia, with most of the reduction occurring between 2016 and 2017 after the introduction of pre-exposure prophylaxis (PrEP) in late 2016.<sup>3-5</sup>

Past studies have shown that sexual practices among MSM have changed over time (e.g. an increase in condomless anal sex).<sup>6-9</sup> However, there have been very limited studies examining whether there are any differences in sexual practices between men who have sex with men only (MSMO) and men who have sex with men and women (MSMW or bisexual MSM).<sup>10-12</sup> Therefore, this study aimed to compare the characteristics and sexual practices, and describe the trends in HIV/STI positivity in MSMO and MSMW attending a large sexual health clinic in Melbourne between 2011 and 2018. Additionally, we aimed to explore differences within MSMW depending on the most frequent gender of their sexual partners.

## METHODS

1  
2  
3 We conducted a repeated cross-sectional analysis of retrospective data of MSM attending the  
4 Melbourne Sexual Health Centre (MSHC), Australia, between 2011 and 2018. MSHC is a  
5 public clinic that offers a range of free clinical services regarding sexual health. MSHC is the  
6 largest sexual health clinic in Victoria and provides more than 50,000 clinical consultations a  
7 year, approximately 40% of clients are MSM.<sup>4</sup> Upon arrival, all clients are invited to  
8 complete a questionnaire via computer-assisted self-interviewing (CASI), which collects  
9 client's demographic characteristics (e.g. age, country of birth, Aboriginal and Torres Strait  
10 Islander status), sexual practices (i.e. gender of partners, type of partners [regular or casual],  
11 number of partners, condom use and anal sex practice [receptive anal sex (RAS) and  
12 insertive anal sex (IAS)]), sex work status and injecting drug use behaviour. Data on sexual  
13 practices and injecting drug use were measured in the past 12 months, and sex work status  
14 was defined as clients who had ever worked in the sex industry during lifetime. Clients are  
15 allowed to decline to answer any questions they may wish to.  
16  
17  
18  
19  
20  
21  
22  
23  
24  
25  
26  
27  
28  
29  
30  
31  
32  
33  
34

35 Clients who were male, aged 18 years and above, reported having sex with another man in  
36 the past 12 months, and attended MSHC for the first time between 2011 and 2018 were  
37 included in this analysis. We only included data from the client's first visit to MSHC to avoid  
38 any bias including men with repeated visits as they might be at a higher risk of HIV/STI with  
39 different sexual practices. We categorised MSM into two main categories based on their self-  
40 reported sexual practices: (1) MSMO, and (2) MSMW. We further categorised MSMW into  
41 two groups: (1) MSM who reported more female partners than male partners in the past 12  
42 months (MSMW-W); and (2) MSM who reported more male partners than female partners in  
43 the past 12 months (MSMW-M) and compared the characteristics between the two groups.  
44  
45  
46  
47  
48  
49  
50  
51  
52  
53  
54  
55  
56 Men with an equal number of male and female partners in the past 12 months (N=336) were  
57  
58  
59  
60

1  
2  
3 excluded in the comparisons among MSMW subgroups but they were included in the overall  
4  
5 MSMW category.  
6  
7  
8  
9

10 We also extracted the HIV/STI testing results on the day. STI testing results included syphilis  
11 (serologically confirmed by rapid plasma regain test [RPR], *T. pallidum* enzyme  
12 immunoassay [EIA] and *T. pallidum* particle agglutination assay [TPPA], and including all  
13 syphilis stages), gonorrhoea (stratified by anatomical site: anorectal, urethral and  
14 oropharyngeal) and chlamydia (stratified by anatomical site: anorectal and urethral). For  
15 HIV, we analysed separately incident cases (diagnosed on the day of the first visit using  
16 screening assay followed by a confirmatory Western Blot assay) and MSM with a previous  
17 HIV diagnosis visiting MSHC for the first time. There was a major change in gonorrhoea and  
18 chlamydia testing at our clinic.<sup>13</sup> Prior to 2015, gonorrhoea was diagnosed by using culture  
19 and chlamydia was diagnosed by nucleic acid amplification test (NAAT) using the BD  
20 ProbeTec Strand Displacement Amplification Assay (Becton, Dickinson and Co., Sparks,  
21 MD, USA). From March 2015 onwards, testing for both gonorrhoea and chlamydia was  
22 performed using the Aptima Combo 2 Transcription-Mediated Amplification Assay (AC2)  
23 (Hologic Gen-Probe, San Diego, CA, USA). HIV and syphilis testing methods did not change  
24 during the study period.  
25  
26  
27  
28  
29  
30  
31  
32  
33  
34  
35  
36  
37  
38  
39  
40  
41  
42  
43  
44  
45  
46

47 Before July 2015, screening for urethral gonorrhoea was only performed in MSM with  
48 urethral symptoms while screening for urethral gonorrhoea was performed in all MSM as per  
49 the Australian guidelines.<sup>14</sup> However, since July 2015, all MSM were screened for both  
50 urethral gonorrhoea and chlamydia regardless of the presence of symptoms as per our clinic  
51 policy.<sup>15</sup> Therefore, the positivity for urethral gonorrhoea was calculated as the number of  
52 men tested positive divided by the number of men who were tested for urethral chlamydia to  
53  
54  
55  
56  
57  
58  
59  
60



1  
2  
3 avoid the bias of testing urethral gonorrhoea only among symptomatic MSM until July 2015,  
4 and this approach was also used elsewhere.<sup>16</sup> In addition, routine screening for oropharyngeal  
5  
6  
7  
8  
9  
10  
11  
12  
13  
14  
15  
16  
17  
18  
19  
20  
21  
22  
23  
24  
25  
26  
27  
28  
29  
30  
31  
32  
33  
34  
35  
36  
37  
38  
39  
40  
41  
42  
43  
44  
45  
46  
47  
48  
49  
50  
51  
52  
53  
54  
55  
56  
57  
58  
59  
60

avoid the bias of testing urethral gonorrhoea only among symptomatic MSM until July 2015, and this approach was also used elsewhere.<sup>16</sup> In addition, routine screening for oropharyngeal chlamydia among all MSM at MSHC were introduced in April 2017; before then, only MSM who reported as a contact of infection were tested. Routine screening for HIV, syphilis, oropharyngeal and anorectal gonorrhoea, and anorectal chlamydia were conducted among all MSM and the screening guidelines did not change over the study period at MSHC.

Chi-squared test was used to compare the demographic characteristics and sexual practices between risk groups. We examined the annual trends of sexual practices and HIV/STI positivity for MSMO and MSMW using chi-squared trend test. Annual trends for condomless IAS and RAS with casual male partners were examined separately. We reported any condomless sex (i.e. IAS and/or RAS) with regular male partners for the trend analysis due to the small number of participants who reported having regular male partners. For chlamydia and gonorrhoea positivity, we calculated the annual trends for 2011-2014 and 2015-2018 separately due to the change of the diagnostic assays. Univariable and multivariable logistic regression was used to examine the association between sexual practice (MSMW or MSMO) and HIV/STI positivity. We assessed HIV and each STI separately, and this included (1) gonorrhoea at any anatomical site, (2) chlamydia at any anatomical site, (3) syphilis, (4) new HIV diagnosis on the day of the first visit and (5) previous HIV diagnosis as the dependent variables. Therefore, five different logistic regression models were conducted, and the independent variables included sexual practice (being MSMW or MSMO and using MSMW as reference), the year of the visit and all potential confounding factors (i.e., variables with  $P < 0.20$  in the univariable analyses) in the multivariable analysis. Missing data were presented as 'no information'. We repeated the same procedure using sexual practice categorised in MSMO, MSMW-M and MSMW-W as the independent variable with MSMW-W as the

1  
2  
3 reference group. We reported the crude odds ratio (OR) and adjusted odds ratio (aOR), and  
4  
5 their respective 95% confidence intervals (CI). The 0.05 level was used for statistical  
6  
7 significance in all the analysis. All statistical analyses were conducted using SPSS V.25. This  
8  
9 study was approved by the Alfred Hospital Ethics Committee, Melbourne, Australia (project  
10  
11 number 83/18).  
12  
13  
14  
15  
16

### 17 ***Patient and Public Involvement***

18  
19 Patients were not directly involved in this study; only data gathered retrospectively and  
20  
21 coming from electronic health records was used.  
22  
23  
24  
25

## 26 **RESULTS**

### 27 ***Demographic characteristics***

28  
29 There were 18,851 MSM attending MSHC for the first time between 2011 and 2018. We  
30  
31 excluded 1,909 MSM (10.1%) who had had sexual contact with another man but declined to  
32  
33 report the number of male sexual partners, 1,630 MSM (8.6%) who reported no male sexual  
34  
35 partner in the past 12 months at the current visit but had reported male partners at subsequent  
36  
37 visit at the clinic, and 538 (2.9%) duplicate records from the same individual on the same  
38  
39 day. The remaining 14,774 men were included in this data analysis, and the number of men  
40  
41 increased from 1,215 in 2011 to 2,468 in 2018 but the proportion of MSMW remained stable  
42  
43 over the period (Table 1). Overall, there were 12,795 MSMO (86.6%) and 1,979 MSMW  
44  
45 (13.4%). Among 1,979 MSMW, 804 (40.6%) were MSMW-W, 839 (42.4%) MSMW-M and  
46  
47 336 (17.0%) had an equal number of male and female partners in the past 12 months.  
48  
49  
50  
51  
52  
53  
54  
55

56 Among the 14,774 MSM, the median age was 27 years (interquartile range, IQR: 23-33) and  
57  
58 MSMW were slightly older than MSMO (median age: 29 *versus* 27;  $P < 0.001$ ) (Table 2). The  
59  
60

1  
2  
3 proportion of men born in Australia was higher in MSMW than in MSMO (55.3% *versus*  
4 48.5%,  $P<0.001$ ). The proportion of injecting drug use in the past 12 months was higher in  
5 MSMW than MSMO (2.0% *versus* 1.6%,  $P=0.032$ ; Table 2); and it was similar between  
6 MSMW-W and MSMW-M (2.5% *versus* 2.1%,  $P=0.777$ ; Table S1).  
7  
8  
9

### 14 ***Sexual practices***

16  
17 The proportion of men who reported sex overseas in the past 12 months was comparable  
18 between MSMW and MSMO (37.1% *versus* 34.5%;  $P=0.060$ ); and more MSMW-W (43.0%)  
19 reported sex overseas than MSMW-M (34.6%;  $P=0.002$ ) (Table S1). Less than half (40.1%)  
20 of MSMO had a male regular partner. Among MSMW, 8.5% had a regular male partner,  
21 33.5% a regular female partner, and 4.6% had regular male and female partners (Table 2).  
22  
23  
24  
25  
26  
27  
28  
29

30  
31 The median number sexual partners (regardless gender of the partners) in the past 12 months,  
32 was higher among MSMW (7, interquartile range [IQR]: 5-12 in MSMW-M; and 6, IQR: 4-  
33 11 in MSMW-W) than MSMO (5, IQR: 3-10;  $P<0.001$ ) (Table S1). The proportion of men  
34 with  $\geq 5$  sexual partners increased significantly in MSMW (from 63.1% in 2011 to 70.2% in  
35 2018,  $P_{\text{trend}}=0.014$ ), as well as in MSMO (from 50.8% to 56.4%;  $P_{\text{trend}}=0.002$ ) (Table S2-  
36 S3). In addition, the proportion of MSMW with  $\geq 5$  female sexual partners increased  
37 significantly from 23.2% in 2011 to 29.5% in 2018 ( $P_{\text{trend}}=0.039$ ) (Table S3).  
38  
39  
40  
41  
42  
43  
44  
45  
46  
47  
48

49 Anal sex practices with casual male partners varied between MSMO and MSMW. The  
50 proportion of MSMO having RAS only with casual male partners was higher (9.9%) than in  
51 MSMW (6.6%); however, the proportion of MSMO having IAS only with casual male  
52 partners was lower (10.5%) than in MSMW (14.2%;  $P<0.001$ ). Condomless anal sex with  
53 casual male partners in the past 12 months was more common in MSMO than in MSMW for  
54  
55  
56  
57  
58  
59  
60

1  
2  
3 RAS (53.8% *versus* 49.9%;  $P=0.012$ ) but there was no significant difference in IAS. Two-  
4  
5 thirds (67.5%) of MSMW had condomless vaginal and/or anal sex with female casual  
6  
7 partners in the past 12 months (Table 2). Among MSMO, condomless RAS with casual male  
8  
9 partners in the past 12 months increased from 46.2% to 63.3% ( $P_{\text{trend}} < 0.001$ ) and IAS from  
10  
11 45.8% to 64.2% ( $P_{\text{trend}} < 0.001$ ) from 2011 to 2018 (Figure 1, Table S2). Similarly, among  
12  
13 MSMW, there was an increase from 41.3% to 57.9% in condomless RAS ( $P_{\text{trend}} = 0.011$ ), the  
14  
15 proportion of condomless IAS with casual male partners did not change during the study  
16  
17 period ( $P_{\text{trend}} = 0.354$ ), and the proportion of condomless sex with casual female partners  
18  
19 remained high and only increased marginally from 65.4% to 71.0% ( $P_{\text{trend}} = 0.056$ ) (Figure 1,  
20  
21 Table S3). MSMW-M compared to MSMW-W showed higher condomless sex with casual  
22  
23 male partners (55.0% *versus* 46.1% for RAS;  $P=0.004$  and 57.0% *versus* 47.1% for IAS;  
24  
25  $P=0.001$ ) and lower condomless sex with casual female partners (60.9% *versus* 75.6%;  
26  
27  $P < 0.001$ ) (Table S1).

28  
29  
30  
31  
32  
33  
34  
35 Regarding regular male partners, both condomless RAS and condomless IAS were more  
36  
37 commonly reported in MSMO (RAS: 71.5%; IAS: 71.4%) than in MSMW (RAS 62.9%;  
38  
39 IAS: 63.5%;  $P=0.005$ ;  $P=0.010$ ) (Table 1) and condomless anal sex regardless of IAS or  
40  
41 RAS, increased from 69.2% to 78.4% in MSMO ( $P_{\text{trend}} < 0.001$ ) but not in MSMW ( $P_{\text{trend}}$   
42  
43  $= 0.435$ ) (Figure 1, Tables S2-S3).

### 44 45 46 47 48 49 ***HIV/STI positivity***

50  
51 Overall, MSMO had a higher HIV, syphilis, gonorrhoea and chlamydia positivity than  
52  
53 MSMW. MSMO had higher extra-genital gonorrhoea and chlamydia positivity than MSMW;  
54  
55 however, the positivity for urethral gonorrhoea and urethral chlamydia did not differ between  
56  
57 the two groups (Table 3). In the period 2011-2014, there was an increase in oropharyngeal  
58  
59  
60

1  
2  
3 and anorectal and oropharyngeal gonorrhoea among MSMO, while chlamydia remained  
4 stable. There was no increase in gonorrhoea and chlamydia positivity in the period 2015-2018  
5  
6 in either group (Tables S4-S5). Among MSMW, MSMW-M had higher extra-genital  
7  
8 gonorrhoea and chlamydia positivity but similar urethral gonorrhoea and chlamydia, HIV and  
9  
10 syphilis compared to MSMW-W (Table S6).  
11  
12  
13

14  
15  
16  
17 There was a 41.8% increase in syphilis positivity from 5.5% (43/778) in 2011 to 7.8%  
18  
19 (152/1917) in 2018 ( $P_{\text{trend}}=0.025$ ) in MSMO (Table S4) and more than a six-fold increase in  
20  
21 syphilis positivity from 0.9% (1/112) in 2011 to 6.4% (19/299) in 2018 ( $P_{\text{trend}}=0.004$ ) in  
22  
23 MSMW, although the number of infections remained low in this group (Table S5). HIV  
24  
25 positivity did not change in either group between 2011 and 2018 (Table S4-S5).  
26  
27  
28

29  
30  
31 After adjusting for other potential confounding factors, MSMO had higher odds of testing  
32  
33 positive for gonorrhoea at any anatomical site (aOR 1.36, 95% CI 1.13 to 1.64), chlamydia at  
34  
35 any anatomical site (aOR 1.39; 95% CI 1.16 to 1.67), syphilis (aOR 1.74, 95% CI 1.37 to  
36  
37 2.22) and HIV (aOR 4.60, 95% CI 2.43 to 8.70) compared to MSMW (Table 4).  
38  
39

40  
41 Additionally, MSMO had higher odds of testing positive for gonorrhoea at any anatomical  
42  
43 site (aOR 1.58; 95% CI 1.15 to 2.18), chlamydia at any anatomical site (aOR 1.47; 95% CI  
44  
45 1.09 to 1.99), syphilis (aOR 2.11, 95% CI 1.36 to 3.27), and HIV (aOR 5.49, 95% CI 1.74 to  
46  
47 17.30) compared with MSMW-W in the adjusted analysis; however, there was no significant  
48  
49 difference in HIV/STI positivity between MSMW-M and MSMW-W nor MSMW-M and  
50  
51 MSMO (Table 5).  
52  
53  
54

## 55 56 **DISCUSSION** 57 58 59 60

1  
2  
3 In this study of 12,795 men who have sex with men only (MSMO) and 1,979 men who have  
4 sex with men and women (MSMW) in Melbourne, Australia, we found significant changes in  
5 sexual practices among MSMW between 2011 and 2018, a period in which rates of STIs had  
6 been increasing in both MSM and the heterosexual population. Specifically, we found that  
7 condom use with casual female partners remained low during the study period and that  
8 condomless anal sex with casual male partners had increased in MSMW, and these results  
9 echo the rise in syphilis positivity over the same period. While some sexual risk practices and  
10 STI positivity were generally lower in MSMW than in MSMO, their rising rates could  
11 indicate more transmission from MSMW to their female partners than had occurred  
12 previously. Clarifying this issue and what factors are causing the rising rates of STIs is likely  
13 to contribute significantly to the design of STI control programs.  
14  
15  
16  
17  
18  
19  
20  
21  
22  
23  
24  
25  
26  
27  
28  
29  
30

31 Several studies have assessed HIV and sexual practices in MSMW, but their results are  
32 conflicting. A meta-analysis published in 2014 concluded that MSMW had a lower HIV  
33 prevalence (16.9%) compared to MSMO (33.3%) but the prevalence is higher than men who  
34 have sex with women only (MSWO) (3.5%), and this is consistent with our findings.<sup>17</sup> The  
35 authors also found that MSMW (15.9%) were less likely to engage in condomless receptive  
36 anal sex compared to MSMO (35.0%).<sup>17</sup> Other factors such as drug and alcohol use, other  
37 risky practices (e.g. group sex, paying for sex), frequent HIV testing and the use of  
38 biomedical interventions (e.g. PrEP and PEP) are also associated with HIV acquisition,<sup>18-20</sup>  
39 and very limited studies examining these factors between MSMO and MSMW. However,  
40 some other studies conducted in different settings, such as China, India and the US, have  
41 shown the risk of HIV among MSMW is similar or even at a higher risk compared to  
42 MSMO.<sup>21-24</sup>  
43  
44  
45  
46  
47  
48  
49  
50  
51  
52  
53  
54  
55  
56  
57  
58  
59  
60

1  
2  
3 Our data suggest that MSMO have a higher positivity for syphilis, chlamydia and gonorrhoea  
4 than MSMW; however, the comparison of STI positivity between MSMO and MSMW varies  
5 across published studies. For example, Davis and colleagues (2016) conducted a study among  
6 Chinese MSM showing no differences between MSMW and MSMO in the lifetime  
7 prevalence of syphilis, gonorrhoea, chlamydia and genital warts but a higher prevalence of  
8 genital herpes in MSMW (6.6%) compared to MSMO (0.4%).<sup>24</sup> In the US, MSMW had a  
9 57% increased odds of having an STI compared to heterosexuals, but no differences were  
10 found between MSMO and heterosexuals or MSMO and MSMW.<sup>23</sup> Similarly, an Indian  
11 study has shown that there were no differences in any STI positivity (i.e. either syphilis,  
12 gonorrhoea or chlamydia) between MSMO and MSMW.<sup>21</sup> Furthermore, MSMW are also  
13 less likely to ever have an HIV/STI test compared to MSMO,<sup>21,25,26</sup> which is consistent with  
14 an Australian qualitative study suggesting MSMW have a poor sexual health knowledge  
15 compared to MSMO.<sup>27</sup> Furthermore, the rise in antimicrobial resistance in STI,<sup>28</sup> particularly  
16 gonorrhoea, is of particular concern. Transmission of antimicrobial resistance across risk  
17 populations (e.g. between MSMW and female) may have occurred.<sup>12,29</sup>

18  
19  
20  
21  
22  
23  
24  
25  
26  
27  
28  
29  
30  
31  
32  
33  
34  
35  
36  
37  
38  
39  
40 Our data also show that MSMW are less likely to have RAS with male partners and less  
41 likely to have condomless RAS. These findings may explain the reasons why MSMW have a  
42 lower positivity for anorectal gonorrhoea and chlamydia than MSMO in our study.

43  
44  
45  
46  
47 Importantly, we did not find any significant differences in urethral gonorrhoea and chlamydia  
48 between MSMO and MSMW despite differences in anal sex and condom use. This may be  
49 because some urethral chlamydial infections in MSMW are acquired from women and  
50 urethral gonorrhoea is commonly acquired from no anal sexual activity such as oral sex.<sup>30,31</sup>

51  
52  
53  
54  
55  
56 The disparities of HIV and syphilis positivity between MSMO and MSMW were more  
57  
58  
59  
60

1  
2  
3 pronounced compared to gonorrhoea and chlamydia, and there was a striking increase in  
4  
5 syphilis positivity in both groups.  
6  
7  
8  
9

10 The differential sexual practices and HIV/STI positivity among MSMW<sup>32,33</sup> may also be due  
11  
12 to other health issues such as mental health and substance use, that also place them as an  
13  
14 especially vulnerable population.<sup>34,35</sup> Bisexual men may face unique stressors, such as  
15  
16 specific prejudices against them, pressures or negative attitudes from both heterosexual and  
17  
18 LGBT individuals, which can have a negative impact on their health.<sup>35,36</sup> This factors may  
19  
20 also render bisexual men less likely to discuss their sexual health and disclose their sexual  
21  
22 orientation with their GPs<sup>11</sup> and, hence not receive the appropriate sexual health care and  
23  
24 management. An LGBT-friendly and non-judgemental approach is essential to build up the  
25  
26 trust between clinicians and patients. Furthermore, the current health promotion and  
27  
28 prevention programmes mainly targeting the MSM population as a whole. It is possible that  
29  
30 some MSMW may not be engaged in the LGBT community and hence they may not targeted  
31  
32 with the current programmes. Future public health campaigns and prevention programmes  
33  
34 should also tailor for MSMW via different channels.  
35  
36  
37  
38  
39  
40  
41

42 Our study, including a high number of MSM over an 8-year period, provides relevant and  
43  
44 updated information to understand changes in sexual practices and STI epidemiology  
45  
46 occurring in Australia and across the world. We also provide detailed information regarding  
47  
48 condom use, differencing between both casual or regular partners, and receptive or insertive  
49  
50 anal sex. Nevertheless, there are several limitations in the study that must be considered.  
51  
52 First, data were self-reported by MSHC clients which may influence the results regarding  
53  
54 sexual practices, including the number and gender of the sexual partners due to social  
55  
56 desirability or recall bias. However, the use of a computer-assisted self-interview to collect  
57  
58  
59  
60



1  
2  
3 sexual history at the clinic has shown to improve the accuracy and reduce biased information.  
4  
5 Besides that, data on sexual orientation was not collected and the categorisation of MSMO  
6  
7 and MSMW was based on self-reported sexual practice rather than sexual identity. This  
8  
9 means that MSMW in this study might not define themselves as bisexual men. Second, this  
10  
11 study was conducted in one urban major sexual health clinic. It is possible that MSM  
12  
13 attending a sexual health clinic are more likely to be at increased sexual risk and hence our  
14  
15 findings may not be generalizable to the whole MSM population in Australia or in other  
16  
17 settings. Third, other sexual practices that may increase the risk of HIV/STI (e.g., chemsex,  
18  
19 group sex, rimming or saliva use as a lubricant)<sup>37-39</sup> were not routinely collected in the clinic  
20  
21 and hence not included in the study. Fourth, we only included individuals who attended the  
22  
23 clinic for the first time. Sexual practices might change with age and further longitudinal  
24  
25 cohort studies examining the changes in sexual practices among individuals would be  
26  
27 required. Lastly, we were unable to examine the temporal trends for gonorrhoea and  
28  
29 chlamydia over the 8-year period because we changed the diagnostic test for gonorrhoea and  
30  
31 chlamydia at our clinic in 2015.  
32  
33  
34  
35  
36  
37  
38  
39

## 40 CONCLUSION

41  
42 In our study population, MSMW were a heterogeneous group in which sexual practices and  
43  
44 STI positivity varied between MSMW with mainly female partners and MSMW with mainly  
45  
46 male partners. Compared to MSMO, MSMW were less likely to engage in condomless sex  
47  
48 and had a lower HIV/STI positivity. From 2011 to 2018, changes in the sexual practices in  
49  
50 MSM have affected both MSMW and MSMO leading to an increased risk of STI in both  
51  
52 subgroups. Further studies also including heterosexual men and women are needed to better  
53  
54 understand the recent changes in the STI epidemiology.  
55  
56  
57  
58

## 59 ACKNOWLEDGMENTS

60

1  
2  
3 The authors would like to acknowledge Afrizal Afrizal for his assistance with data extraction  
4  
5 at the Melbourne Sexual Health Centre.  
6  
7  
8  
9

## 10 **CONTRIBUTORSHIP STATEMENT**

11 EPFC and CKF planned, conceived and designed the study. RC conducted some preliminary  
12  
13 analyses. MMS performed the literature review, conducted the statistical analysis and wrote  
14  
15 the first draft of the manuscript. EPFC provided statistical advice and oversaw the study. RC,  
16  
17 CKF, JSH, CSB, JJO, MYC and EPFC assisted with data interpretation. MMS, RC, CKF,  
18  
19 JSH, CSB, JJO, MYC and EPFC critically revised it for important intellectual content and  
20  
21 approved the final version of the manuscript.  
22  
23  
24  
25

## 26 **COMPETING INTERESTS**

27  
28 None declared.  
29  
30  
31  
32

## 33 **FUNDING**

34 EPFC was supported by the Australian National Health and Medical Research Council Early  
35  
36 Career Fellowship (Grant number: GNT1091226). The funder had no role in the study  
37  
38 design, collection of data, writing, or decision to submit the paper for publication.  
39  
40  
41  
42

## 43 **DATA SHARING STATEMENT**

44 All data relevant to the study are included in the article or uploaded as supplementary  
45  
46 information.  
47  
48  
49

## 50 **REFERENCES**

- 51  
52  
53 1. World Health Organization. *Report on Global Sexually Transmitted Infection*  
54  
55 *Surveillance, 2018*. (World Health Organization, ed.). Geneva; 2018. licence: CC BY-  
56  
57 NC-SA 3.0 IGO.  
58  
59  
60

- 1  
2  
3 2. Kirkcaldy RD, Weston E, Segurado AC, Hughes G. Epidemiology of gonorrhoea: a  
4 global perspective. *Sex Health*. 2019;16(5):401. doi:10.1071/sh19061  
5  
6
- 7  
8 3. Kirby Institute. Annual surveillance report 2018 HIV, viral hepatitis and sexually  
9 transmissible infections in Australia. 2018.  
10  
11  
12 [https://kirby.unsw.edu.au/sites/default/files/kirby/report/KI\\_Annual-Surveillance-](https://kirby.unsw.edu.au/sites/default/files/kirby/report/KI_Annual-Surveillance-Report-2018_0.pdf)  
13  
14 [Report-2018\\_0.pdf](https://kirby.unsw.edu.au/sites/default/files/kirby/report/KI_Annual-Surveillance-Report-2018_0.pdf).  
15  
16
- 17 4. Needleman R, Chow EPF, Towns JM, et al. Access to sexual health services after the  
18 rapid roll out of the launch of pre-exposure prophylaxis for HIV in Melbourne,  
19 Australia: A retrospective cross-sectional analysis. *Sex Health*. 2018:528-532.  
20  
21  
22 doi:<http://dx.doi.org/10.1071/SH17182>  
23  
24  
25
- 26 5. Ryan KE, Mak A, Stooze M, et al. Protocol for an HIV Pre-exposure Prophylaxis  
27 (PrEP) Population Level Intervention Study in Victoria Australia: The PrEPX Study.  
28  
29  
30  
31  
32 *Front Public Heal*. 2018;6(May):1-11. doi:10.3389/fpubh.2018.00151  
33  
34
- 35 6. Zhang Kudon H, Mulatu MS, Song W, et al. Trends in Condomless Sex Among MSM  
36 Who Participated in CDC-Funded HIV Risk-Reduction Interventions in the United  
37 States, 2012-2017. *JPHMP*. 2020.doi: 10.1097/phh.0000000000001143.  
38  
39
- 40 7. Hess KL, Crepaz N, Rose C, et al. Trends in Sexual Behavior Among Men Who have  
41 Sex with Men (MSM) in High-Income Countries, 1990-2013: A Systematic Review.  
42  
43  
44  
45  
46  
47  
48  
49  
50  
51  
52  
53  
54  
55  
56  
57  
58  
59  
60
9. Chow EPF, Grulich AE, Fairley CK. Epidemiology and prevention of sexually  
transmitted infections in men who have sex with men at risk of HIV. *Lancet HIV*.  
2019;6(6):e396-e405. doi:10.1016/S2352-3018(19)30043-8

- 1  
2  
3 10. Jeffries WL 4th. Beyond the bisexual bridge: sexual health among U.S. men who have  
4 sex with men and women. *Am J Prev Med*. 2014;47(3):320-329.  
5  
6 doi:10.1016/j.amepre.2014.05.002  
7
- 8  
9  
10 11. Friedman MR, Stall R, Silvestre AJ, et al. Stuck in the middle: longitudinal HIV-  
11 related health disparities among men who have sex with men and women. *J Acquir*  
12 *Immune Defic Syndr*. 2014;66(2):213-220. doi:10.1097/QAI.000000000000143  
13  
14
- 15 12. Williamson DA, Chow EPF, Gorrie CL, et al. Bridging of Neisseria gonorrhoeae  
16 lineages across sexual networks in the HIV pre-exposure prophylaxis era. *Nat*  
17 *Commun*. 2019;10(1):1-10. doi:10.1038/s41467-019-12053-4  
18  
19
- 20 13. Cornelisse VJ, Chow EPF, Huffam S, et al. Increased detection of pharyngeal and  
21 rectal gonorrhoea in men who have sex with men after transition from culture to nucleic  
22 acid amplification testing. *Sex Transm Dis*. 2017; 44(2):114-117.  
23  
24 doi:10.1097/OLQ.0000000000000553  
25  
26
- 27 14. Templeton D, Read P, Varma R, Bourne C. Australian sexually transmitted infection  
28 & HIV testing guidelines 2014 for asymptomatic men who have sex with men.  
29 2014;(May 2013):217-229. [http://stipu.nsw.gov.au/wp-](http://stipu.nsw.gov.au/wp-content/uploads/STIGMA_Testing_Guidelines_Final_v5.pdf)  
30 [content/uploads/STIGMA\\_Testing\\_Guidelines\\_Final\\_v5.pdf](http://stipu.nsw.gov.au/wp-content/uploads/STIGMA_Testing_Guidelines_Final_v5.pdf).  
31  
32
- 33 15. Ong JJ, Fethers K, Fairley CK, et al. Asymptomatic and symptomatic urethral  
34 gonorrhoea in men who have sex with men attending a sexual health service. *Clin*  
35 *Microbiol Infect*. 2017;23(8):555-559. doi:10.1016/j.cmi.2017.02.020  
36  
37
- 38 16. Chow EPF, Tomnay J, Fehler G, et al. Substantial increases in chlamydia and  
39 gonorrhoea positivity unexplained by changes in individual-level sexual behaviors  
40 among men who have sex with men in an Australian sexual health service from 2007 to  
41 2013. *Sex Transm Dis*. 2015;42(2):81-87. doi:10.1097/OLQ.0000000000000232  
42  
43
- 44 17. Friedman MR, Wei C, Klem M Lou, Silvestre AJ, Markovic N, Stall R. HIV infection  
45  
46  
47  
48  
49  
50  
51  
52  
53  
54  
55  
56  
57  
58  
59  
60

- 1  
2  
3 and sexual risk among men who have sex with men and women (MSMW): A  
4 systematic review and meta-analysis. *PLoS One*. 2014;9(1).  
5  
6 doi:10.1371/journal.pone.0087139  
7  
8  
9  
10  
11 18. Chou R, Evans C, Hoverman A, et al. Preexposure prophylaxis for the prevention of  
12 HIV infection: Evidence report and systematic review for the US preventive services  
13 task force. *JAMA - J Am Med Assoc*. 2019;321(22):2214-2230.  
14  
15 doi:10.1001/jama.2019.2591  
16  
17  
18  
19 19. Woolf, S.E., Maisto, S.A. Alcohol Use and Risk of HIV infection among Men Who  
20 Have Sex with Men. *AIDS Behav*. 2009; 13:757–782. doi:10.1007/s10461-007-9354-0  
21  
22  
23  
24 20. Hutchinson AB, Farnham PG, Sansom SL, Yaylali E, Mermin JH. Cost-effectiveness  
25 of frequent HIV testing of high-risk populations in the United States. *J Acquir Immune*  
26 *Defic Syndr*. 2016;71(3):323-330. doi:10.1097/QAI.0000000000000838  
27  
28  
29  
30 21. Ramakrishnan L, Ramanathan S, Chakrapani V, et al. Comparison of Sexual Risk,  
31 HIV/STI Prevalence and Intervention Exposure Among Men Who Have Sex with Men  
32 and Women (MSMW) and Men Who Have Sex with Men Only (MSMO) in India:  
33 Implications for HIV Prevention. *AIDS Behav*. 2015;19(12):2255-2269.  
34  
35  
36  
37  
38  
39  
40  
41  
42  
43 22. Jeffries IV WL. Beyond the bisexual bridge: Sexual health among U.S. men who have  
44 sex with men and women. *Am J Prev Med*. 2014;47(3):320-329.  
45  
46  
47  
48  
49  
50  
51  
52  
53  
54 23. Dyer T V., Khan MR, Sandoval M, et al. Drug Use and Sexual HIV Transmission Risk  
55 Among Men Who have Sex with Men and Women (MSMW), Men Who have Sex  
56 with Men only (MSMO), and Men Who have Sex with Women Only (MSWO) and the  
57 Female Partners of MSMW and MSWO: A Network Perspective. *AIDS Behav*.  
58 2017;21(12):3590-3598. doi:10.1007/s10461-017-1736-3  
59  
60

- 1  
2  
3  
4  
5  
6  
7  
8  
9  
10  
11  
12  
13  
14  
15  
16  
17  
18  
19  
20  
21  
22  
23  
24  
25  
26  
27  
28  
29  
30  
31  
32  
33  
34  
35  
36  
37  
38  
39  
40  
41  
42  
43  
44  
45  
46  
47  
48  
49  
50  
51  
52  
53  
54  
55  
56  
57  
58  
59  
60
24. Davis A, Best J, Luo J, et al. Differences in risk behaviours, HIV/STI testing and HIV/STI prevalence between men who have sex with men and men who have sex with both men and women in China. *Int J STD AIDS*. 2016;27(10):840-849. doi:10.1177/0956462415596302
  25. Jeffries IV WL. HIV testing among bisexual men in the United States. *AIDS Educ Prev*. 2010;22(4):356-370. doi:10.1521/aeap.2010.22.4.356
  26. Mirandola M, Gios L, Sherriff N, et al. Socio-demographic Characteristics, Sexual and Test-Seeking Behaviours Amongst Men Who have Sex with Both Men and Women: Results from a Bio-behavioural Survey in 13 European Cities. *AIDS Behav*. 2017;21(10):3013-3025. doi:10.1007/s10461-017-1831-5
  27. Smardon T, Vaisey A, Chow EPF, Fairley CK, Hocking JS. Sexual practices and healthcare use of men who have sex with men only and men who have sex with men and women – a Qualitative comparison. *2019 Australas Sex Heal Conf Jt with 2019 Australas HIV&AIDS Conf*. 2019;Sept 17-19(Perth, WA).
  28. Williamson DA, Fairley CK, Howden BP, et al. Trends and Risk Factors for Antimicrobial-Resistant *Neisseria gonorrhoeae*, Melbourne, Australia, 2007 to 2018. *Antimicrob Agents Chemother*. 2019; 63(10): e01221-19. doi:10.1128/AAC.01221-19
  29. Kwong JC, Chow EPF, Stevens K, et al. Whole-genome sequencing reveals transmission of gonococcal antibiotic resistance among men who have sex with men: An observational study. *Sex Transm Infect*. 2018;94(2):151-157. doi:10.1136/sextrans-2017-053287
  30. Barbee LA, Khosropour CM, Dombrowski JC, Manhart LE, Golden MR. An estimate of the proportion of symptomatic gonococcal, chlamydial and non-gonococcal nonchlamydial urethritis attributable to oral sex among men who have sex with men: A case-control study. *Sex Transm Infect*. 2016;92(2):155-160. doi:10.1136/sextrans-

- 1  
2  
3 2015-052214  
4  
5  
6 31. Nash JL, Hocking JS, Read TRH, et al. Contribution of sexual practices (other than  
7  
8 anal sex) to bacterial sexually transmitted infection transmission in men who have sex  
9  
10 with men: A cross-sectional analysis using electronic health records. *Sex Transm*  
11  
12 *Infect.* 2014;90(1):55-57. doi:10.1136/sextrans-2013-051103  
13  
14  
15 32. Chow EPF, Wilson DP, Zhang L. Estimating HIV incidence among female partners of  
16  
17 bisexual men in China. *Int J Infect Dis.* 2012;16(5). doi:10.1016/j.ijid.2012.01.012  
18  
19  
20 33. Ong JJ, Landika A, Fairley CK, et al. Characteristics, sexual practices and sexually  
21  
22 transmissible infections diagnoses of men who have sex with men and use non-  
23  
24 occupational HIV post-exposure prophylaxis in Victoria, Australia. *Sex Health.* 2016;  
25  
26 13(6):555-559. doi:10.1071/SH16092  
27  
28  
29 34. Gonzales G, Henning C, Gonzales G. Health Disparities by Sexual Orientation :  
30  
31 Results and Implications from the Behavioral Risk Factor Surveillance System. *J*  
32  
33 *Community Health.* 2017; 42(6):1163-1172. doi:10.1007/s10900-017-0366-z  
34  
35  
36 35. Feinstein BA, Health GM, Dyar C. Bisexuality, minority stress, and health. *Curr Sex*  
37  
38 *Heal Rep.* 2018;9(1):42-49. doi:10.1007/s11930-017-0096-3.Bisexuality  
39  
40  
41 36. Marti-pastor M, Ferrer M, Alonso J. Association of Enacted Stigma with Depressive  
42  
43 Symptoms Among Gay and Bisexual Men Who Have Sex with Men : 2020;7(1).  
44  
45 doi:10.1089/lgbt.2018.0230  
46  
47  
48 37. Chow EP, Fairley CK. The role of saliva in gonorrhoea and chlamydia transmission to  
49  
50 extragenital sites among men who have sex with men: new insights into transmission.  
51  
52 2019;22:40-45. doi:10.1002/jia2.25354/full  
53  
54  
55 38. Maxwell S, Shahmanesh M, Gafos M. Chemsex behaviours among men who have sex  
56  
57 with men: A systematic review of the literature. *Int J Drug Policy.* 2019;63:74-89.  
58  
59 doi:10.1016/j.drugpo.2018.11.014  
60

- 1  
2  
3 39. Van Den Boom W, Davidovich U, Heuker J, et al. Is Group Sex a Higher-Risk Setting  
4 for HIV and Other Sexually Transmitted Infections Compared with Dyadic Sex among  
5 Men Who Have Sex with Men? *Sex Transm Dis.* 2016;43(2):99-104.  
6  
7  
8  
9  
10 doi:10.1097/OLQ.0000000000000389  
11  
12  
13  
14  
15  
16  
17  
18  
19  
20  
21  
22  
23  
24  
25  
26  
27  
28  
29  
30  
31  
32  
33  
34  
35  
36  
37  
38  
39  
40  
41  
42  
43  
44  
45  
46  
47  
48  
49  
50  
51  
52  
53  
54  
55  
56  
57  
58  
59  
60

For peer review only



## FIGURES

**Figure 1** Proportion of condomless anal and/or vaginal sex in the past 12 months with casual partners between 2011 and 2018, stratified by men who have sex with men only (MSMO) and men who have sex with men and women (MSMW).

Note. MSM reporting condomless anal and/or vaginal sex includes MSM who sometimes, usually or never used a condom with their sexual partners in the past 12 months. MSMO: men who have sex with men only; MSMW: men who have sex with men and women.

**Figure 2** Positivity for syphilis and HIV between 2011 and 2018, stratified by men who have sex with men only (MSMO) and men who have sex with men and women (MSMW).

Note. MSMO: men who have sex with men only; MSMW: men who have sex with men and women.

1  
2  
3  
4  
5  
6  
7  
8  
9  
10  
11  
12  
13  
14  
15  
16  
17  
18  
19  
20  
21  
22  
23  
24  
25  
26  
27  
28  
29  
30  
31  
32  
33  
34  
35  
36  
37  
38  
39  
40  
41  
42  
43  
44  
45  
46  
47  
48  
49  
50  
51  
52  
53  
54  
55  
56  
57  
58  
59  
60

**TABLES**

For peer review only

**Table 1** Number of men who have sex with men attending the Melbourne Sexual Health Centre between 2011 and 2018, stratified by sexual practice.

|                | 2011        | 2012        | 2013        | 2014        | 2015        | 2016        | 2017        | 2018        | Total        |
|----------------|-------------|-------------|-------------|-------------|-------------|-------------|-------------|-------------|--------------|
| MSMO           | 1047 (86.2) | 1282 (87.7) | 1422 (85.5) | 1433 (85.9) | 1658 (86.5) | 1872 (86.7) | 1938 (87.1) | 2143 (86.8) | 12795 (86.6) |
| MSMW           | 168 (13.8)  | 180 (12.3)  | 241 (14.5)  | 235 (14.1)  | 258 (13.5)  | 286 (13.3)  | 286 (12.9)  | 325 (13.2)  | 1979 (13.4)  |
| <i>MSMW-W</i>  | 70 (41.7)   | 70 (38.9)   | 98 (40.7)   | 108 (46.0)  | 91 (35.3)   | 114 (39.9)  | 116 (40.6)  | 137 (42.2)  | 804 (40.6)   |
| <i>MSMW-M</i>  | 64 (38.1)   | 78 (43.3)   | 96 (39.8)   | 90 (38.3)   | 127 (49.2)  | 117 (40.9)  | 124 (43.4)  | 143 (44.0)  | 839 (42.4)   |
| <i>MSMW(=)</i> | 34 (20.2)   | 32 (17.8)   | 47 (19.5)   | 37 (15.7)   | 40 (15.5)   | 55 (19.2)   | 46 (16.1)   | 45 (13.8)   | 336 (17.0)   |
| Total          | 1215        | 1462        | 1663        | 1668        | 1916        | 2158        | 2224        | 2468        | 14774        |

Note. MSMO: men who have sex with men only; MSMW: men who have sex with men and women; MSMW-M: men who have sex with men and women and had more male than female sexual partners in the past 12 months; MSMW-W: men who have sex with men and women and had more female than male sexual partners in the past 12 month; MSMW(=): men who have sex with men and women but reported an equal number of male and female partners in the past 12 months. Data are presented as n (%) where n is the number of men in each category. The proportion of MSMO and MSMW was calculated using the total number of men each year as the denominator. The proportion of MSMW-W, MSMW-M and MSMW(=) was calculated using the total number of MSMW each year as the denominator.

**Table 2** Demographic characteristics and sexual practices among men who have sex with men attending a sexual health centre in Melbourne, 2011-2018, stratified by men who have sex with men only (MSMO) and men who have sex with men and women (MSMW).

|                                                                               | <b>Men who have sex with men only (N=12,795)</b> | <b>Men who have sex with men and women (N=1,979)</b> | <b>P value</b> |
|-------------------------------------------------------------------------------|--------------------------------------------------|------------------------------------------------------|----------------|
|                                                                               | n (%)                                            | n (%)                                                |                |
| Age (years), median (IQR)                                                     | 27 (23-33)                                       | 29 (24-38)                                           | <0.001         |
| Country of birth                                                              |                                                  |                                                      | <0.001         |
| <i>Australia</i>                                                              | 6,208 (48.5)                                     | 1,094 (55.3)                                         |                |
| <i>Overseas</i>                                                               | 6,110 (47.8)                                     | 790 (39.9)                                           |                |
| <i>No information</i>                                                         | 477 (3.7)                                        | 95 (4.8)                                             |                |
| Aboriginal and Torres Strait Islander Status                                  |                                                  |                                                      | 0.224          |
| <i>Indigenous origin</i>                                                      | 150 (1.2)                                        | 17 (0.9)                                             |                |
| <i>Non-Indigenous origin</i>                                                  | 11,595 (90.6)                                    | 1,783 (90.1)                                         |                |
| <i>No information</i>                                                         | 1,050 (8.2)                                      | 179 (9.0)                                            |                |
| Sex overseas in the past 12 months                                            |                                                  |                                                      | 0.060          |
| <i>Yes</i>                                                                    | 4,415 (34.5)                                     | 735 (37.1)                                           |                |
| <i>No</i>                                                                     | 7,571 (59.2)                                     | 1131 (57.2)                                          |                |
| <i>No information</i>                                                         | 809 (6.3)                                        | 113 (5.7)                                            |                |
| Sex work during lifetime                                                      |                                                  |                                                      | 0.574          |
| <i>Yes</i>                                                                    | 71 (0.6)                                         | 13 (0.7)                                             |                |
| <i>No</i>                                                                     | 12,724 (99.4)                                    | 1,966 (99.3)                                         |                |
| Injected drug use in the past 12 months                                       |                                                  |                                                      | 0.032          |
| <i>Yes</i>                                                                    | 211 (1.6)                                        | 40 (2.0)                                             |                |
| <i>No</i>                                                                     | 12,363 (96.6)                                    | 1,890 (95.5)                                         |                |
| <i>No information</i>                                                         | 221 (1.7)                                        | 49 (2.5)                                             |                |
| Number of female and male sexual partners in the past 12 months, median (IQR) | 5 (3-10)                                         | 6 (4-11)                                             | <0.001         |
| Number of male sexual partners in the past 12 months, median (IQR)            | 5 (3-10)                                         | 2 (1-5)                                              | <0.001         |
| Number of female sexual partners in the past 12 months, median (IQR)          | NA                                               | 2 (1-5)                                              | -              |
| Regular sexual partner                                                        |                                                  |                                                      | -              |
| <i>No regular partner</i>                                                     | 7,513 (58.7)                                     | 1,053 (53.2)                                         |                |
| <i>Regular male partner</i>                                                   | 5,132 (40.1)                                     | 169 (8.5)                                            |                |
| <i>Regular female partner</i>                                                 | NA                                               | 663 (33.5)                                           |                |
| <i>Regular female and male partner</i>                                        | NA                                               | 91 (4.6)                                             |                |
| <i>No information</i>                                                         | 150 (1.2)                                        | 3 (0.2)                                              |                |

|                                                                                                  |               |              |        |
|--------------------------------------------------------------------------------------------------|---------------|--------------|--------|
| Anal sexual practice with regular male partners <sup>a</sup>                                     |               |              | 0.118  |
| <i>Receptive only</i>                                                                            | 435 (8.5)     | 15 (5.8)     |        |
| <i>Insertive only</i>                                                                            | 465 (9.1)     | 16 (6.2)     |        |
| <i>Receptive and insertive</i>                                                                   | 3,921 (76.4)  | 214 (82.3)   |        |
| <i>No anal sex</i>                                                                               | 234 (4.6)     | 9 (3.5)      |        |
| <i>No information</i>                                                                            | 77 (1.5)      | 6 (2.3)      |        |
| Condom use with regular male partners in the past 12 months for receptive anal sex <sup>b*</sup> |               |              | 0.005  |
| <i>Always</i>                                                                                    | 1,241 (28.5)  | 85 (37.1)    |        |
| <i>Not always</i>                                                                                | 3,115 (71.5)  | 144 (62.9)   |        |
| Condom use with regular male partners in the past 12 months for insertive anal sex <sup>c*</sup> |               |              | 0.010  |
| <i>Always</i>                                                                                    | 1,254 (28.6)  | 84 (36.5)    |        |
| <i>Not always</i>                                                                                | 3,132 (71.4)  | 146 (63.5)   |        |
| Vaginal or anal sex with regular female partner <sup>d</sup>                                     |               |              | -      |
| <i>Yes</i>                                                                                       | NA            | 729 (96.7)   |        |
| <i>No</i>                                                                                        | NA            | 10 (1.3)     |        |
| <i>No information</i>                                                                            | NA            | 15 (2.0)     |        |
| Condom use with regular female partners in the past 12 months <sup>e*</sup>                      |               |              | -      |
| <i>Always</i>                                                                                    | NA            | 132 (18.1)   |        |
| <i>Not always</i>                                                                                | NA            | 597 (81.9)   |        |
| Casual sexual partner                                                                            |               |              | -      |
| <i>No casual partner</i>                                                                         | 806 (6.3)     | 11 (0.6)     |        |
| <i>Casual male partner(s)</i>                                                                    | 11,969 (93.5) | 194 (9.8)    |        |
| <i>Casual female partner(s)</i>                                                                  | NA            | 30 (1.5)     |        |
| <i>Casual female and male partner(s)</i>                                                         | NA            | 1,744 (88.1) |        |
| <i>No information</i>                                                                            | 20 (0.2)      | 0 (0)        |        |
| Anal sexual practice with casual male partners                                                   |               |              | <0.001 |
| <i>Receptive only</i>                                                                            | 1,262 (9.9)   | 131 (6.6)    |        |
| <i>Insertive only</i>                                                                            | 1,344 (10.5)  | 282 (14.2)   |        |
| <i>Receptive and insertive</i>                                                                   | 7,835 (61.2)  | 1,060 (53.6) |        |
| <i>No anal sex</i>                                                                               | 1,692 (13.2)  | 422 (21.3)   |        |
| <i>No information</i>                                                                            | 662 (5.2)     | 84 (4.2)     |        |
| Condom use with casual male partners in the past 12 months for receptive anal sex <sup>f*</sup>  |               |              |        |
| <i>Always</i>                                                                                    | 4,207 (46.2)  | 597 (50.1)   | 0.012  |
| <i>Not always</i>                                                                                | 4,890 (53.8)  | 594 (49.9)   |        |
| Condom use with casual male partners in the past 12 months for insertive anal sex <sup>g*</sup>  |               |              |        |
| <i>Always</i>                                                                                    | 4,276 (46.6)  | 649 (48.4)   | 0.223  |

|                                                                            |              |              |   |
|----------------------------------------------------------------------------|--------------|--------------|---|
| <i>Not always</i>                                                          | 4,903 (53.4) | 693 (51.6)   |   |
| Vaginal or anal sex with casual female partner                             |              |              | - |
| <i>Yes</i>                                                                 | NA           | 1,686 (85.2) |   |
| <i>No</i>                                                                  | NA           | 56 (2.8)     |   |
| <i>No information</i>                                                      | NA           | 237 (12.0)   |   |
| Condom use with casual female partners in the past 12 months <sup>h*</sup> |              |              | - |
| <i>Always</i>                                                              | NA           | 548 (32.5)   |   |
| <i>Not always</i>                                                          | NA           | 1,138 (67.5) |   |

Note. NA: Not applicable; IQR: Interquartile range; MSM: men who have sex with men.

<sup>a</sup>Only including MSM with regular male partners or regular male and female partners, <sup>b</sup>Only including MSM that referred receptive only or receptive and insertive anal sex with regular male partners, <sup>c</sup>Only including MSM that referred insertive only or receptive and insertive anal sex with regular male partners, <sup>d</sup>Only including MSM with regular female partners or regular male and female partners <sup>e</sup>Only including MSM that referred vaginal and/or anal sex with regular female partner, <sup>f</sup>Only including MSM that referred receptive only or receptive and insertive anal sex with casual male partners, <sup>g</sup>Only including MSM that referred insertive only or receptive and insertive anal sex with casual male partners, <sup>h</sup>Only including MSM that referred vaginal or anal sex with casual female partners. \*'Not always' was defined as men who sometimes, usually or never used a condom with their sexual partners in the past 12 months (with female partners for vaginal and/or anal sex, with male partners for anal sex).

**Table 3** Positivity for gonorrhoea, chlamydia, syphilis and HIV among men who have sex with men attending a sexual health centre in Melbourne, 2011-2018, stratified by men who have sex with men only (MSMO) and men who have sex with men and women (MSMW).

| HIV/STI                     | Men who have sex with men only (N=12,795) |                           |                        | Men who have sex with men and women (N=1,979) |                           |                        | P value |
|-----------------------------|-------------------------------------------|---------------------------|------------------------|-----------------------------------------------|---------------------------|------------------------|---------|
|                             | No. of men tested, <i>N</i>               | No. of positive, <i>n</i> | Positivity, % (95% CI) | No. of men tested, <i>N</i>                   | No. of positive, <i>n</i> | Positivity, % (95% CI) |         |
| Gonorrhoea                  |                                           |                           |                        |                                               |                           |                        |         |
| <i>Oropharyngeal</i>        | 11,810                                    | 682                       | 5.8 (5.4 to 6.2)       | 1,711                                         | 68                        | 4.0 (3.1 to 5.0)       | 0.002   |
| <i>Urethral*</i>            | 11,699                                    | 390                       | 3.3 (3.0 to 3.7)       | 1,885                                         | 52                        | 2.8 (2.1 to 3.6)       | 0.192   |
| <i>Anorectal</i>            | 11,080                                    | 745                       | 6.7 (6.3 to 7.2)       | 1,404                                         | 58                        | 4.1 (3.2 to 5.3)       | <0.001  |
| <i>Any anatomical site†</i> | 11,951                                    | 1,321                     | 11.1 (10.5 to 11.6)    | 1,829                                         | 140                       | 7.7 (6.5 to 9.0)       | <0.001  |
| Chlamydia                   |                                           |                           |                        |                                               |                           |                        |         |
| <i>Urethral</i>             | 11,699                                    | 410                       | 3.5 (3.2 to 3.9)       | 1,885                                         | 73                        | 3.9 (3.0 to 4.8)       | 0.423   |
| <i>Anorectal</i>            | 11,043                                    | 989                       | 9.0 (8.4 to 9.5)       | 1,404                                         | 83                        | 5.9 (4.7 to 7.3)       | <0.001  |
| <i>Any anatomical site†</i> | 11,891                                    | 1,272                     | 10.7 (10.1 to 11.3)    | 1,907                                         | 141                       | 7.4 (6.3 to 8.7)       | <0.001  |
| Syphilis                    | 11,317                                    | 797                       | 7.0 (6.6 to 7.5)       | 1,773                                         | 81                        | 4.6 (3.6 to 5.6)       | <0.001  |
| HIV                         |                                           |                           |                        |                                               |                           |                        |         |
| <i>New diagnosis‡</i>       | 11,102                                    | 262                       | 2.4 (2.1 to 2.7)       | 1,774                                         | 10                        | 0.6 (0.3 to 1.0)       | <0.001  |
| <i>Previous diagnosis</i>   | 12,795                                    | 316                       | 2.5 (2.2 to 2.8)       | 1,979                                         | 7                         | 0.4 (0.1 to 0.7)       | <0.001  |

Note.\*Before 2015, urethral gonorrhoea testing was only performed among symptomatic MSM with urethral symptoms or self-reported as contact of infection. The number of people tested corresponds to the number of people tested for urethral chlamydia; † Any anatomical site for gonorrhoea includes urethral, anorectal and oropharyngeal; while any site for chlamydia includes urethral and anorectal; ‡ Only including HIV cases diagnosed on the day of the first visit.

**Table 4** Association between sexual practice and gonorrhoea, chlamydia, syphilis and HIV positivity among men who have sex with men only and men who have sex with men and women attending a sexual health centre in Melbourne, 2011-2018.

| HIV/STI                                       | OR (95% CI)          | P value | aOR (95% CI)*        | P value |
|-----------------------------------------------|----------------------|---------|----------------------|---------|
| Gonorrhoea (any anatomical site) <sup>†</sup> |                      |         |                      |         |
| <i>MSMO</i>                                   | 1.50 (1.25 to 1.80)  | <0.001  | 1.36 (1.13 to 1.64)  | 0.001   |
| <i>MSMW</i>                                   | 1                    |         | 1                    | ref     |
| Chlamydia (any anatomical site) <sup>†</sup>  |                      |         |                      |         |
| <i>MSMO</i>                                   | 1.50 (1.25 to 1.80)  | <0.001  | 1.39 (1.16 to 1.67)  | <0.001  |
| <i>MSMW</i>                                   | 1                    |         | 1                    | ref     |
| Syphilis                                      |                      |         |                      |         |
| <i>MSMO</i>                                   | 1.58 (1.25 to 2.00)  | <0.001  | 1.74 (1.37 to 2.22)  | <0.001  |
| <i>MSMW</i>                                   | 1                    |         | 1                    | ref     |
| HIV (new diagnosis) <sup>‡</sup>              |                      |         |                      |         |
| <i>MSMO</i>                                   | 4.26 (2.26 to 8.03)  | <0.001  | 4.60 (2.43 to 8.70)  | <0.001  |
| <i>MSMW</i>                                   | 1                    |         | 1                    | ref     |
| HIV (previous diagnosis)                      |                      |         |                      |         |
| <i>MSMO</i>                                   | 7.13 (3.37 to 15.11) | <0.001  | 9.08 (4.26 to 19.37) | <0.001  |
| <i>MSMW</i>                                   | 1                    | ref     | 1                    | ref     |

Note. OR: crude odds ratio; aOR: adjusted odds ratio; CI: confidence intervals; MSMO: men who have sex with men only; MSMW: men who have sex with men and women. \*Adjusted by age, country of birth, sex overseas, injected drug use in the past 12 months, regular partner, number of male sexual partners in the past 12 months, condom use with casual male partners in the past 12 months and year of visit; <sup>†</sup>Any anatomical site for gonorrhoea includes urethral, anorectal and oropharyngeal; while any site for chlamydia includes urethral and anorectal; <sup>‡</sup>Only including HIV cases diagnosed on the day of the first visit.



**Table 5** Association between sexual practice and gonorrhoea, chlamydia, syphilis and HIV positivity among men who have sex with men only and men who have sex with men and women attending a sexual health centre in Melbourne , 2011-2018.

| HIV/STI                                       | OR (95% CI)            | P value | aOR (95% CI)*          | P value |
|-----------------------------------------------|------------------------|---------|------------------------|---------|
| Gonorrhoea (any anatomical site) <sup>†</sup> |                        |         |                        |         |
| <i>MSMO</i>                                   | 1.96 (1.45 to 2.67)    | <0.001  | 1.58 (1.15 to 2.18)    | 0.005   |
| <i>MSMW-M</i>                                 | 1.91 (1.31 to 2.78)    | 0.001   | 1.41 (0.94 to 2.12)    | 0.093   |
| <i>MSMW-W</i>                                 | 1                      | ref     | 1                      | ref     |
| Chlamydia (any anatomical site) <sup>†</sup>  |                        |         |                        |         |
| <i>MSMO</i>                                   | 1.87 (1.39 to 2.50)    | <0.001  | 1.47 (1.09 to 1.99)    | 0.013   |
| <i>MSMW-M</i>                                 | 1.63 (1.12 to 2.38)    | 0.010   | 1.19 (0.80 to 1.77)    | 0.394   |
| <i>MSMW-W</i>                                 | 1                      | ref     | 1                      | ref     |
| Syphilis                                      |                        |         |                        |         |
| <i>MSMO</i>                                   | 2.18 (1.45 to 3.27)    | <0.001  | 2.11 (1.36 to 3.27)    | 0.001   |
| <i>MSMW-M</i>                                 | 1.48 (0.88 to 2.49)    | 0.142   | 1.08 (0.61 to 1.93)    | 0.791   |
| <i>MSMW-W</i>                                 | 1                      | ref     | 1                      | ref     |
| HIV (new diagnosis) <sup>‡</sup>              |                        |         |                        |         |
| <i>MSMO</i>                                   | 6.01 (1.92 to 18.80)   | 0.002   | 5.49 (1.74 to 17.30)   | 0.004   |
| <i>MSMW-M</i>                                 | 2.38 (0.61 to 9.24)    | 0.210   | 1.81 (0.43 to 7.63)    | 0.422   |
| <i>MSMW-W</i>                                 | 1                      | ref     | 1                      | ref     |
| HIV (previous diagnosis)                      |                        |         |                        |         |
| <i>MSMO</i>                                   | 21.22 (2.98 to 151.30) | 0.002   | 17.91 (2.50 to 128.43) | 0.004   |
| <i>MSMW-M</i>                                 | 6.30 (0.76 to 52.45)   | 0.089   | 4.10 (0.47 to 35.42)   | 0.200   |
| <i>MSMW-W</i>                                 | 1                      | ref     | 1                      | ref     |

Note. OR: crude odds ratio; aOR: adjusted odds ratio; CI: confidence intervals; MSMO: men who have sex with men only; MSMW-M: men who have sex with men and women and had more male than female sexual partner in the past 12 months; MSMW-W: men who have sex with men and women and had more female than male sexual partner in the past 12 months; MSMW-M: men who have sex with men and women and had more male than female sexual partner in the past 12 months. \*Adjusted by age, country of birth, sex overseas, injected drug use in the past 12 months, regular partner, number of male sexual partners in the past 12 months, condom use with casual male partners in the past 12 months and year of visit; †Any anatomical site for gonorrhoea includes urethral, anorectal and oropharyngeal, while any site for chlamydia includes urethral and anorectal; ‡Only including HIV cases diagnosed on the day of the first visit.

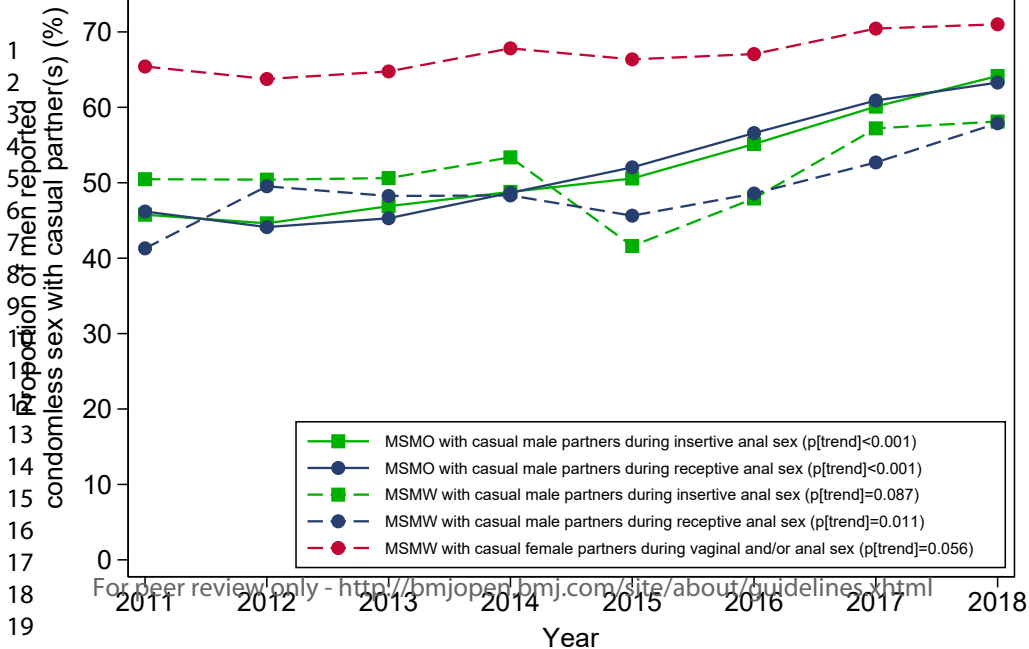

1  
2  
3  
4  
5  
6  
7  
8  
9  
10  
11  
12  
13  
14  
15  
16  
17  
18  
19  
20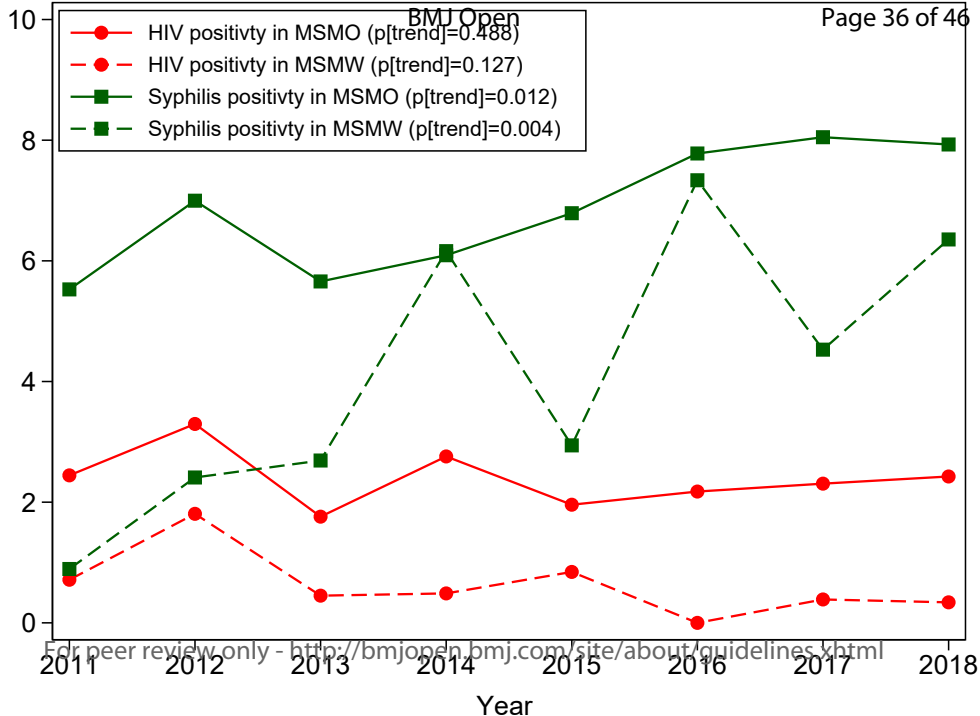

1  
2  
3  
4  
5  
6  
7  
8  
9  
10  
11  
12  
13  
14  
15  
16  
17  
18  
19  
20  
21  
22  
23  
24  
25  
26  
27  
28  
29  
30  
31  
32  
33  
34  
35  
36  
37  
38  
39  
40  
41  
42  
43  
44  
45  
46  
47  
48  
49  
50  
51  
52  
53  
54  
55  
56  
57  
58  
59  
60

## SUPPLEMENTARY MATERIAL

### **Trends and differences in sexual practices and sexually transmitted infections in men who have sex with men only (MSMO) and men who have sex with men and women (MSMW): a repeated cross-sectional study in Melbourne, Australia.**

*Mario Martín-Sánchez, Richard Case, Christopher K. Fairley, Jane S. Hocking, Catriona S. Bradshaw, Jason J. Ong, Marcus Y. Chen, Eric P.F. Chow*

|                                                                                                                                                                                                            |   |
|------------------------------------------------------------------------------------------------------------------------------------------------------------------------------------------------------------|---|
| Table S1 Demographic characteristics and sexual practices among men who have sex with men only and men who have sex with men and women attending a sexual health centre in Melbourne, 2011-2018.....       | 2 |
| Table S2 Temporal trend of the sexual practices among men who have sex with men only attending a sexual health centre in Melbourne, 2011-2018.....                                                         | 4 |
| Table S3 Temporal trend of the sexual practices among men who have sex with men and women attending a sexual health centre in Melbourne, 2011-2018.....                                                    | 5 |
| Table S4 Temporal trend of the positivity for sexually transmitted infections and HIV among men who have sex with men only attending a sexual health centre in Melbourne, 2011-2018.....                   | 7 |
| Table S5 Temporal trend of the positivity for sexually transmitted infections and HIV among men who have sex with men and women attending a sexual health centre in Melbourne, 2011-2018.....              | 8 |
| Table S6 Positivity for gonorrhoea, chlamydia, syphilis and HIV among men who have sex with men only and men who have sex with men and women attending a sexual health centre in Melbourne, 2011-2018..... | 9 |

**Table S1** Demographic characteristics and sexual practices among men who have sex with men only and men who have sex with men and women attending a sexual health centre in Melbourne, 2011-2018.

|                                                                                                                | MSMO<br>(N=12,795) | MSMW-<br>M<br>(N=804) | MSMW-<br>W<br>(N=839) | Comparison<br>across three<br>groups | Comparison<br>between<br>MSMW-M<br>and MSM-W |
|----------------------------------------------------------------------------------------------------------------|--------------------|-----------------------|-----------------------|--------------------------------------|----------------------------------------------|
|                                                                                                                | n (%)              | n (%)                 | n (%)                 | P value                              | P value                                      |
| <b>Age (years), median(IQR)</b>                                                                                | 27 (23-33)         | 29 (24-39)            | 28 (24-36)            | <0.001                               | 0.845                                        |
| <b>Country of birth</b>                                                                                        |                    |                       |                       | <0.001                               | 0.167                                        |
| <i>Australia</i>                                                                                               | 6,208 (48.5)       | 465 (57.8)            | 452 (53.9)            |                                      |                                              |
| <i>Overseas</i>                                                                                                | 6,110 (47.8)       | 297 (36.9)            | 348 (41.5)            |                                      |                                              |
| <i>No information</i>                                                                                          | 477 (3.7)          | 42 (5.2)              | 39 (4.5)              |                                      |                                              |
| <b>Aboriginal and Torres Strait<br/>Islander Status</b>                                                        |                    |                       |                       | 0.280                                | 0.254                                        |
| <i>Indigenous origin</i>                                                                                       | 150 (1.2)          | 10 (1.2)              | 5 (0.6)               |                                      |                                              |
| <i>Non-Indigenous origin</i>                                                                                   | 11,595 (90.6)      | 715 (88.9)            | 762 (90.8)            |                                      |                                              |
| <i>No information</i>                                                                                          | 1,050 (8.2)        | 79 (9.8)              | 72 (8.6)              |                                      |                                              |
| <b>Sex overseas in the past 12<br/>months</b>                                                                  |                    |                       |                       | <0.001                               | 0.002                                        |
| <i>Yes</i>                                                                                                     | 4,415 (34.5)       | 278 (34.6)            | 361 (43.0)            |                                      |                                              |
| <i>No</i>                                                                                                      | 7,571 (59.2)       | 470 (58.5)            | 433 (51.6)            |                                      |                                              |
| <i>No information</i>                                                                                          | 809 (6.3)          | 56 (7.0)              | 45 (5.4)              |                                      |                                              |
| <b>Sex work during lifetime</b>                                                                                |                    |                       |                       | 0.454                                | 0.722                                        |
| <i>Yes</i>                                                                                                     | 71 (0.6)           | 7 (0.9)               | 6 (0.7)               |                                      |                                              |
| <i>No</i>                                                                                                      | 12,724 (99.4)      | 797 (99.1)            | 833 (99.3)            |                                      |                                              |
| <b>Injected drug use in past 12<br/>months</b>                                                                 |                    |                       |                       | <0.001                               | 0.777                                        |
| <i>Yes</i>                                                                                                     | 211 (1.6)          | 17 (2.1)              | 21 (2.5)              |                                      |                                              |
| <i>No</i>                                                                                                      | 12,363 (96.6)      | 763 (95.7)            | 797 (97.5)            |                                      |                                              |
| <i>No information</i>                                                                                          | 221 (1.7)          | 17 (2.1)              | 21 (2.5)              |                                      |                                              |
| <b>Number of male and female<br/>sexual partners in the past 12<br/>months, median (IQR)</b>                   | 5 (3-10)           | 7 (5-12)              | 6 (4-11)              | <0.001                               | <0.001                                       |
| <b>Number of male sexual partners<br/>in the past 12 months, median<br/>(IQR)</b>                              | 5 (3-10)           | 5 (3-10)              | 1 (1-2)               | <0.001                               | <0.001                                       |
| <b>Number of female sexual<br/>partners in the past 12 months,<br/>median (IQR)</b>                            | NA                 | 1 (1-2)               | 5 (3-8)               | NA                                   | <0.001                                       |
| <b>Regular sexual partner</b>                                                                                  |                    |                       |                       | NA                                   | <0.001                                       |
| <i>No regular partner</i>                                                                                      | 7,513 (58.7)       | 433 (53.9)            | 453 (54.1)            |                                      |                                              |
| <i>Regular male partner</i>                                                                                    | 5,132 (40.1)       | 138 (17.2)            | 11 (1.3)              |                                      |                                              |
| <i>Regular female partner</i>                                                                                  | NA                 | 195 (24.3)            | 350 (41.7)            |                                      |                                              |
| <i>Regular female and male partner</i>                                                                         | NA                 | 37 (4.6)              | 23 (2.7)              |                                      |                                              |
| <i>No information</i>                                                                                          | 150 (1.2)          | 1 (0.1)               | 2 (0.2)               |                                      |                                              |
| <b>Anal sexual practice with regular<br/>male partners<sup>a</sup></b>                                         |                    |                       |                       | <0.001                               | 0.001                                        |
| <i>Receptive only</i>                                                                                          | 435 (8.5)          | 10 (5.7)              | 2 (5.7)               |                                      |                                              |
| <i>Insertive only</i>                                                                                          | 465 (9.1)          | 13 (7.4)              | 0 (0)                 |                                      |                                              |
| <i>Receptive and insertive</i>                                                                                 | 3,921 (76.4)       | 145 (82.4)            | 26 (74.3)             |                                      |                                              |
| <i>No anal sex</i>                                                                                             | 234 (4.6)          | 6 (3.4)               | 2 (5.7)               |                                      |                                              |
| <i>No information</i>                                                                                          | 79 (1.5)           | 2 (1.1)               | 5 (14.3)              |                                      |                                              |
| <b>Condom use with regular male<br/>partners in the past 12 months<br/>for receptive anal sex<sup>b*</sup></b> |                    |                       |                       | 0.150                                | 0.275                                        |
| <i>Always</i>                                                                                                  | 1,241 (28.5)       | 50 (32.3)             | 12 (42.9)             |                                      |                                              |
| <i>Not always</i>                                                                                              | 3,115 (71.5)       | 105 (67.7)            | 16 (57.1)             |                                      |                                              |
| <b>Condom use with regular male<br/>partners in the past 12 months<br/>for insertive anal sex<sup>c*</sup></b> |                    |                       |                       | 0.142                                | 0.935                                        |
| <i>Always</i>                                                                                                  | 1,254 (28.6)       | 56 (35.4)             | 9 (34.6)              |                                      |                                              |
| <i>Not always</i>                                                                                              | 3,132 (71.4)       | 102 (64.6)            | 17 (65.4)             |                                      |                                              |

|    |                                                    |               |            |            |        |        |
|----|----------------------------------------------------|---------------|------------|------------|--------|--------|
| 1  |                                                    |               |            |            |        |        |
| 2  |                                                    |               |            |            |        |        |
| 3  | <b>Vaginal or anal sex with regular</b>            |               |            |            | NA     | 0.903  |
| 4  | <b>female partner<sup>d</sup></b>                  |               |            |            |        |        |
| 5  | <i>Yes</i>                                         | NA            | 223 (96.1) | 361 (96.8) |        |        |
| 6  | <i>No</i>                                          | NA            | 4 (1.7)    | 5 (1.3)    |        |        |
| 7  | <i>No information</i>                              | NA            | 5 (2.2)    | 7 (1.9)    |        |        |
| 8  | <b>Condom use with regular female</b>              |               |            |            | NA     | 0.551  |
| 9  | <b>partners in the past 12</b>                     |               |            |            |        |        |
| 10 | <b>months<sup>e*</sup></b>                         |               |            |            |        |        |
| 11 | <i>Always</i>                                      | NA            | 42 (18.8)  | 61 (16.9)  |        |        |
| 12 | <i>Not always</i>                                  | NA            | 181 (81.2) | 300 (83.1) |        |        |
| 13 | <b>Casual sexual partner</b>                       |               |            |            | NA     | <0.001 |
| 14 | <i>No casual partner</i>                           | 806 (6.3)     | 0          | 0          |        |        |
| 15 | <i>Casual male partner(s)</i>                      | 11,969 (93.5) | 112 (13.9) | 0          |        |        |
| 16 | <i>Casual female partner(s)</i>                    | NA            | 0          | 19 (2.3)   |        |        |
| 17 | <i>Casual female and male</i>                      | NA            | 692 (86.1) | 820 (97.7) |        |        |
| 18 | <i>partner(s)</i>                                  | NA            | 692 (86.1) | 820 (97.7) |        |        |
| 19 | <i>No information</i>                              | 20 (0.2)      | 0          | 0          |        |        |
| 20 | <b>Anal sexual practice with casual</b>            |               |            |            | <0.001 | <0.001 |
| 21 | <b>male partners</b>                               |               |            |            |        |        |
| 22 | <i>Receptive only</i>                              | 1,262 (9.9)   | 45 (5.6)   | 64 (7.6)   |        |        |
| 23 | <i>Insertive only</i>                              | 1,344 (10.5)  | 116 (14.4) | 119 (14.2) |        |        |
| 24 | <i>Receptive and insertive</i>                     | 7,835 (61.2)  | 524 (65.2) | 407 (48.5) |        |        |
| 25 | <i>No anal sex</i>                                 | 1,692 (13.2)  | 108 (13.4) | 210 (25.0) |        |        |
| 26 | <i>No information</i>                              | 662 (5.2)     | 11 (1.4)   | 39 (4.6)   |        |        |
| 27 | <b>Condom use with casual male</b>                 |               |            |            | 0.004  | 0.004  |
| 28 | <b>partners in the past 12 months</b>              |               |            |            |        |        |
| 29 | <b>for receptive anal sex<sup>f*</sup></b>         |               |            |            |        |        |
| 30 | <i>Always</i>                                      | 4,207 (46.2)  | 256 (45.0) | 254 (53.9) |        |        |
| 31 | <i>Not always</i>                                  | 4,890 (53.8)  | 313 (55.0) | 217 (46.1) |        |        |
| 32 | <b>Condom use with casual male</b>                 |               |            |            | 0.003  | 0.001  |
| 33 | <b>partners in the past 12 months</b>              |               |            |            |        |        |
| 34 | <b>for insertive anal sex<sup>g*</sup></b>         |               |            |            |        |        |
| 35 | <i>Always</i>                                      | 4,276 (46.6)  | 275 (43.0) | 278 (52.9) |        |        |
| 36 | <i>Not always</i>                                  | 4,903 (53.4)  | 365 (57.0) | 248 (47.1) |        |        |
| 37 | <b>Vaginal or anal sex with casual</b>             |               |            |            | -      | <0.001 |
| 38 | <b>female partner</b>                              |               |            |            |        |        |
| 39 | <i>Yes</i>                                         | NA            | 658 (81.8) | 799 (95.2) |        |        |
| 40 | <i>No</i>                                          | NA            | 19 (2.4)   | 24 (2.9)   |        |        |
| 41 | <i>No information</i>                              | NA            | 127 (15.8) | 16 (1.9)   |        |        |
| 42 | <b>Condom use with casual female</b>               |               |            |            | -      | <0.001 |
| 43 | <b>partners in the past 12 months<sup>h*</sup></b> |               |            |            |        |        |
| 44 | <i>Always</i>                                      | NA            | 257 (39.1) | 195 (24.4) |        |        |
| 45 | <i>Not always</i>                                  | NA            | 401 (60.9) | 604 (75.6) |        |        |

Note. NA: Not applicable; IQR: Interquartile range; MSM: men who have sex with men; MSMO: men who have sex with men only; MSMW-W: men who have sex with men and women and had more female than male sexual partner in the past 12 months; MSMW-M: men who have sex with men and women and had more male than female sexual partner in the past 12 months; <sup>a</sup>Only including MSM with regular male partners or regular male and female partners; <sup>b</sup>Only including MSM that referred receptive only or receptive and insertive anal sex with regular male partners; <sup>c</sup>Only including MSM that referred insertive only or receptive and insertive anal sex with regular male partners; <sup>d</sup>Only including MSM with regular female partners or regular male and female partners; <sup>e</sup>Only including MSM that referred vaginal or anal sex with regular female partner; <sup>f</sup> Only including MSM that referred receptive only or receptive and insertive anal sex with casual male partners; <sup>g</sup> Only including MSM that referred insertive only or receptive and insertive anal sex with casual male partners, <sup>h</sup> Only including MSM that referred vaginal or anal sex with casual female partners; \*'Not always' was defined as men who sometimes, usually or never used a condom with their sexual partners in the past 12 months (with female partners for vaginal and/or anal sex, with male partners for anal sex).

**Table S2** Temporal trend of the sexual practices among men who have sex with men only attending a sexual health centre in Melbourne, 2011-2018.

|                                                                                           | 2011     |      | 2012     |      | 2013     |      | 2014     |      | 2015     |      | 2016     |      | 2017     |      | 2018     |      | P <sub>trend</sub> |
|-------------------------------------------------------------------------------------------|----------|------|----------|------|----------|------|----------|------|----------|------|----------|------|----------|------|----------|------|--------------------|
|                                                                                           | <i>n</i> | %    |                    |
| <b>Number of sexual partners in the past 12 months</b>                                    |          |      |          |      |          |      |          |      |          |      |          |      |          |      |          |      | 0.002              |
| <5                                                                                        | 515      | 49.2 | 598      | 46.6 | 645      | 45.4 | 626      | 43.7 | 686      | 41.4 | 802      | 42.8 | 859      | 44.3 | 934      | 43.6 | -                  |
| ≥5                                                                                        | 532      | 50.8 | 684      | 53.4 | 777      | 54.6 | 807      | 56.3 | 972      | 58.6 | 1070     | 57.2 | 1079     | 55.7 | 1209     | 56.4 | -                  |
| <b>Condom use with regular male partners in the past 12 months*</b>                       |          |      |          |      |          |      |          |      |          |      |          |      |          |      |          |      | <0.001             |
| <i>Always</i>                                                                             | 134      | 30.8 | 164      | 31.2 | 160      | 30.0 | 142      | 26.3 | 167      | 27.6 | 201      | 28.5 | 139      | 19.4 | 165      | 21.6 | -                  |
| <i>Not always</i>                                                                         | 301      | 69.2 | 362      | 68.8 | 373      | 70.0 | 398      | 73.7 | 437      | 72.4 | 504      | 71.5 | 576      | 80.6 | 598      | 78.4 | -                  |
| <b>Anal sexual practice with casual male partners</b>                                     |          |      |          |      |          |      |          |      |          |      |          |      |          |      |          |      |                    |
| <i>Receptive only</i>                                                                     | 74       | 7.5  | 109      | 9.1  | 109      | 8.1  | 140      | 10.3 | 151      | 9.5  | 196      | 11.0 | 218      | 11.8 | 265      | 13.0 | <0.001             |
| <i>Insertive only</i>                                                                     | 98       | 10.0 | 133      | 11.0 | 153      | 11.4 | 150      | 11.1 | 178      | 11.3 | 205      | 11.5 | 194      | 10.5 | 233      | 11.4 | 0.580              |
| <i>Receptive and insertive</i>                                                            | 634      | 64.5 | 750      | 62.3 | 847      | 63.3 | 877      | 64.6 | 1050     | 66.4 | 1177     | 66.2 | 1207     | 65.2 | 1293     | 63.4 | 0.396              |
| <i>No anal sex</i>                                                                        | 177      | 18.0 | 212      | 17.6 | 229      | 17.1 | 190      | 14.0 | 203      | 12.8 | 201      | 11.3 | 233      | 12.6 | 247      | 12.1 | <0.001             |
| <b>Condom use with casual male partners in the past 12 months for receptive anal sex*</b> |          |      |          |      |          |      |          |      |          |      |          |      |          |      |          |      | <0.001             |
| <i>Always</i>                                                                             | 381      | 53.8 | 480      | 55.9 | 523      | 54.7 | 522      | 51.3 | 576      | 48.0 | 596      | 43.4 | 557      | 39.1 | 572      | 36.7 | -                  |
| <i>Not always</i>                                                                         | 327      | 46.2 | 379      | 44.1 | 433      | 45.3 | 495      | 48.7 | 625      | 52.0 | 777      | 56.6 | 868      | 60.9 | 986      | 63.3 | -                  |
| <b>Condom use with casual male partners in the past 12 months for insertive anal sex*</b> |          |      |          |      |          |      |          |      |          |      |          |      |          |      |          |      | <0.001             |
| <i>Always</i>                                                                             | 397      | 54.2 | 489      | 55.4 | 531      | 53.1 | 526      | 51.2 | 607      | 49.4 | 620      | 44.9 | 559      | 39.9 | 547      | 35.8 | -                  |
| <i>Not always</i>                                                                         | 335      | 45.8 | 394      | 44.6 | 469      | 46.9 | 501      | 48.8 | 621      | 50.6 | 762      | 55.1 | 842      | 60.1 | 979      | 64.2 | -                  |

\* 'Not always' was defined as men who sometimes, usually or never used a condom with their sexual partners in the past 12 months (with female partners for vaginal or anal sex, with male partners for anal sex).

**Table S3** Temporal trend of the sexual practices among men who have sex with men and women attending a sexual health centre in Melbourne, 2011-2018.

|                                                                                           | 2011     |      | 2012     |      | 2013     |      | 2014     |      | 2015     |      | 2016     |      | 2017     |      | 2018     |      | 2011-18            |
|-------------------------------------------------------------------------------------------|----------|------|----------|------|----------|------|----------|------|----------|------|----------|------|----------|------|----------|------|--------------------|
|                                                                                           | <i>n</i> | %    | P <sub>trend</sub> |
| <b>Number of sexual partners past 12 months</b>                                           |          |      |          |      |          |      |          |      |          |      |          |      |          |      |          |      | 0.014              |
| <5                                                                                        | 62       | 36.9 | 66       | 36.7 | 95       | 39.4 | 82       | 34.9 | 94       | 36.4 | 90       | 31.5 | 94       | 32.9 | 97       | 29.8 | -                  |
| ≥5                                                                                        | 106      | 63.1 | 114      | 63.3 | 146      | 60.6 | 153      | 65.1 | 164      | 63.6 | 196      | 68.5 | 192      | 67.1 | 228      | 70.2 | -                  |
| <b>Number of male sexual partners past 12 months</b>                                      |          |      |          |      |          |      |          |      |          |      |          |      |          |      |          |      | 0.106              |
| <5                                                                                        | 122      | 72.6 | 129      | 71.7 | 172      | 71.4 | 167      | 71.1 | 195      | 75.6 | 205      | 71.7 | 202      | 70.6 | 212      | 65.2 | -                  |
| ≥5                                                                                        | 46       | 27.4 | 51       | 28.3 | 69       | 28.6 | 68       | 28.9 | 63       | 24.4 | 81       | 28.3 | 84       | 29.4 | 113      | 34.8 | -                  |
| <b>Number of female sexual partners past 12 months</b>                                    |          |      |          |      |          |      |          |      |          |      |          |      |          |      |          |      | 0.039              |
| <5                                                                                        | 129      | 76.8 | 133      | 73.9 | 185      | 76.8 | 179      | 76.2 | 185      | 71.7 | 204      | 71.3 | 206      | 72.0 | 229      | 70.5 | -                  |
| ≥5                                                                                        | 39       | 23.2 | 47       | 26.1 | 56       | 23.2 | 56       | 23.8 | 73       | 28.3 | 82       | 28.7 | 80       | 28.0 | 96       | 29.5 | -                  |
| <b>Condom use with regular male partners in the past 12 months*</b>                       |          |      |          |      |          |      |          |      |          |      |          |      |          |      |          |      | 0.435              |
| <i>Always</i>                                                                             | 11       | 45.8 | 5        | 21.7 | 13       | 39.4 | 13       | 39.4 | 9        | 37.5 | 9        | 29.0 | 10       | 26.3 | 14       | 35.9 | -                  |
| <i>Not always</i>                                                                         | 13       | 54.2 | 18       | 78.3 | 20       | 60.6 | 20       | 60.6 | 15       | 62.5 | 22       | 71.0 | 28       | 73.7 | 25       | 64.1 | -                  |
| <b>Anal sexual practice with casual male partners</b>                                     |          |      |          |      |          |      |          |      |          |      |          |      |          |      |          |      |                    |
| <i>Receptive only</i>                                                                     | 6        | 3.8  | 11       | 6.3  | 15       | 6.6  | 13       | 5.7  | 17       | 7.0  | 26       | 9.4  | 16       | 5.8  | 27       | 8.7  | 0.068              |
| <i>Insertive only</i>                                                                     | 19       | 11.9 | 25       | 14.4 | 32       | 14.1 | 27       | 11.8 | 41       | 16.8 | 43       | 15.5 | 43       | 15.6 | 52       | 16.8 | 0.107              |
| <i>Receptive and insertive</i>                                                            | 86       | 54.1 | 96       | 55.2 | 128      | 56.4 | 136      | 59.4 | 132      | 54.1 | 149      | 53.8 | 151      | 54.7 | 182      | 58.9 | 0.670              |
| <i>No anal sex</i>                                                                        | 48       | 30.2 | 42       | 24.1 | 52       | 22.9 | 53       | 23.1 | 54       | 22.1 | 59       | 21.3 | 66       | 23.9 | 48       | 15.5 | 0.003              |
| <b>Condom use with casual male partners in the past 12 months for receptive anal sex*</b> |          |      |          |      |          |      |          |      |          |      |          |      |          |      |          |      | 0.011              |
| <i>Always</i>                                                                             | 54       | 58.7 | 54       | 50.5 | 74       | 51.7 | 77       | 51.7 | 81       | 54.4 | 90       | 51.4 | 79       | 47.3 | 88       | 42.1 | -                  |
| <i>Not always</i>                                                                         | 38       | 41.3 | 53       | 49.5 | 69       | 48.3 | 72       | 48.3 | 68       | 45.6 | 85       | 48.6 | 88       | 52.7 | 121      | 57.9 | -                  |
| <b>Condom use with casual male partners in the past 12 months for insertive anal sex*</b> |          |      |          |      |          |      |          |      |          |      |          |      |          |      |          |      | 0.087              |
| <i>Always</i>                                                                             | 52       | 49.5 | 60       | 49.6 | 79       | 49.4 | 76       | 46.6 | 101      | 58.4 | 100      | 52.1 | 83       | 42.8 | 98       | 41.9 | -                  |
| <i>Not always</i>                                                                         | 53       | 50.5 | 61       | 50.4 | 81       | 50.6 | 87       | 53.4 | 72       | 41.6 | 92       | 47.9 | 111      | 57.2 | 136      | 58.1 | -                  |
| <b>Condom use with regular female partners in the past 12 months*</b>                     |          |      |          |      |          |      |          |      |          |      |          |      |          |      |          |      | 0.837              |
| <i>Always</i>                                                                             | 16       | 22.5 | 16       | 22.2 | 8        | 10.0 | 10       | 13.2 | 17       | 18.9 | 22       | 18.2 | 19       | 18.6 | 24       | 20.5 | -                  |
| <i>Not always</i>                                                                         | 55       | 77.5 | 56       | 77.8 | 72       | 90.0 | 66       | 86.8 | 73       | 81.1 | 99       | 81.8 | 83       | 81.4 | 93       | 79.5 | -                  |
| <b>Condom use with casual female partners in the past 12 months*</b>                      |          |      |          |      |          |      |          |      |          |      |          |      |          |      |          |      | 0.056              |



|   |                   |    |      |    |      |     |      |     |      |     |      |     |      |     |      |     |      |   |
|---|-------------------|----|------|----|------|-----|------|-----|------|-----|------|-----|------|-----|------|-----|------|---|
| 1 |                   |    |      |    |      |     |      |     |      |     |      |     |      |     |      |     |      |   |
| 2 |                   |    |      |    |      |     |      |     |      |     |      |     |      |     |      |     |      |   |
| 3 | <i>Always</i>     | 46 | 34.6 | 54 | 36.2 | 74  | 35.2 | 65  | 32.2 | 74  | 33.6 | 82  | 32.9 | 73  | 29.6 | 80  | 29.0 | - |
| 4 | <i>Not always</i> | 87 | 65.4 | 95 | 63.8 | 136 | 64.8 | 137 | 67.8 | 146 | 66.4 | 167 | 67.1 | 174 | 70.4 | 196 | 71.0 | - |

\* 'Not always' was defined as men who sometimes, usually or never used a condom with their sexual partners in the past 12 months (with female partners for vaginal or anal sex, with male partners for anal sex).

For peer review only

**Table S4** Temporal trend of the positivity for sexually transmitted infections and HIV among men who have sex with men only attending a sexual health centre in Melbourne, 2011-2018.

|                                         | 2011            | 2012               | 2013                | 2014               | 2015                | 2016                | 2017                | 2018                | 2011-2014          | 2015-2018          | 2011-2018          |
|-----------------------------------------|-----------------|--------------------|---------------------|--------------------|---------------------|---------------------|---------------------|---------------------|--------------------|--------------------|--------------------|
|                                         | n/N (%)         | n/N (%)            | n/N (%)             | n/N (%)            | n/N (%)             | n/N (%)             | n/N (%)             | n/N (%)             | P <sub>trend</sub> | P <sub>trend</sub> | P <sub>trend</sub> |
| <b>Gonorrhoea</b>                       |                 |                    |                     |                    |                     |                     |                     |                     |                    |                    |                    |
| <i>Oropharyngeal</i>                    | 18/973<br>(1.8) | 28/1,164<br>(2.4)  | 43/1,307<br>(3.3)   | 42/1,340<br>(3.1)  | 122/1,539<br>(7.9)  | 130/1,709<br>(7.6)  | 154/1,803<br>(8.5)  | 145/1,975<br>(7.3)  | 0.037              | 0.755              | NA                 |
| <i>Urethral</i> <sup>*</sup>            | 38/961<br>(4.0) | 36/1,155<br>(3.1)  | 47/1,291<br>(3.6)   | 40/1,325<br>(3.0)  | 56/1,528<br>(3.7)   | 55/1,691<br>(3.3)   | 63/1,782<br>(3.5)   | 55/1,966<br>(2.8)   | 0.364              | 0.215              | NA                 |
| <i>Anorectal</i>                        | 25/922<br>(2.7) | 42/1,082<br>(3.9)  | 70/1,209<br>(5.8)   | 71/1,260<br>(5.6)  | 128/1,431<br>(8.9)  | 115/1,591<br>(7.2)  | 132/1,686<br>(7.8)  | 162/1,899<br>(8.5)  | 0.001              | 0.954              | NA                 |
| <i>Any anatomical site</i> <sup>†</sup> | 66/986<br>(6.7) | 81/1,178<br>(6.9)  | 122/1,324<br>(9.2)  | 130/1,349<br>(9.6) | 215/1,552<br>(13.9) | 220/1,738<br>(12.7) | 241/1,826<br>(13.2) | 246/1,998<br>(12.3) | 0.002              | 0.261              | NA                 |
| <b>Chlamydia</b>                        |                 |                    |                     |                    |                     |                     |                     |                     |                    |                    |                    |
| <i>Urethral</i>                         | 30/961<br>(3.1) | 43/1,155<br>(3.7)  | 48/1,291<br>(3.7)   | 38/1,325<br>(2.9)  | 68/1,528<br>(4.5)   | 64/1,691<br>(3.8)   | 51/1,782<br>(2.9)   | 68/1,966<br>(3.5)   | 0.652              | 0.067              | NA                 |
| <i>Anorectal</i>                        | 63/922<br>(6.8) | 80/1,081<br>(7.4)  | 108/1,210<br>(8.9)  | 97/1,254<br>(7.7)  | 126/1,412<br>(8.9)  | 164/1,589<br>(10.3) | 162/1,681<br>(9.6)  | 189/1,894<br>(10.0) | 0.282              | 0.489              | NA                 |
| <i>Any anatomical site</i> <sup>†</sup> | 86/989<br>(8.7) | 114/1,178<br>(9.7) | 142/1,325<br>(10.7) | 128/1,348<br>(9.5) | 178/1,542<br>(11.5) | 199/1,721<br>(11.6) | 196/1,806<br>(10.9) | 229/1,982<br>(11.6) | 0.436              | 0.869              | NA                 |
| <b>Syphilis</b>                         | 43/778<br>(5.5) | 79/1129<br>(7.0)   | 73/1,290<br>(5.7)   | 80/1,313<br>(6.1)  | 103/1,517<br>(6.8)  | 130/1,671<br>(7.8)  | 137/1,702<br>(8.0)  | 152/1,917<br>(7.8)  | -                  | -                  | 0.012              |
| <b>HIV (new diagnosis)</b> <sup>‡</sup> | 22/900<br>(2.4) | 36/1,092<br>(3.3)  | 22/1,250<br>(1.8)   | 35/1,269<br>(2.8)  | 29/1,481<br>(2.0)   | 35/1,608<br>(2.2)   | 38/1,647<br>(2.3)   | 45/1,855<br>(2.4)   | -                  | -                  | 0.488              |

Note. *n* represents de number of MSM with a positive result and *N* the number of MSM tested. NA: not applicable; MSM: men who have sex with men; \*Before 2015, urethral gonorrhoea testing was only performed among symptomatic MSM with urethral symptoms or self-reported as contact of infection. The number of people tested corresponds to the number of people tested for urethral chlamydia; † Any anatomical site for gonorrhoea includes urethral, anorectal and oropharyngeal; while any site for chlamydia includes urethral and anorectal; ‡ Only including HIV cases diagnosed on the day of the first visit.

**Table S5** Temporal trend of the positivity for sexually transmitted infections and HIV among men who have sex with men and women attending a sexual health centre in Melbourne, 2011-2018.

|                              | 2011            | 2012            | 2013            | 2014            | 2015            | 2016             | 2017            | 2018            | 2011-2014          | 2015-2018          | 2011-2018          |
|------------------------------|-----------------|-----------------|-----------------|-----------------|-----------------|------------------|-----------------|-----------------|--------------------|--------------------|--------------------|
|                              | n/N (%)          | n/N (%)         | n/N (%)         | P <sub>trend</sub> | P <sub>trend</sub> | P <sub>trend</sub> |
| <b>Gonorrhoea</b>            |                 |                 |                 |                 |                 |                  |                 |                 |                    |                    |                    |
| <i>Oropharyngeal</i>         | 1/150<br>(0.7)  | 2/154<br>(1.3)  | 7/209<br>(3.3)  | 3/209<br>(1.4)  | 14/220<br>(6.4) | 12/238<br>(5.0)  | 17/246<br>(6.9) | 12/285<br>(4.2) | 0.387              | 0.448              | NA                 |
| <i>Urethral</i> *            | 3/163<br>(1.8)  | 5/172<br>(2.9)  | 9/230<br>(3.8)  | 6/219<br>(2.7)  | 7/247<br>(2.8)  | 10/271<br>(3.7)  | 7/275<br>(2.5)  | 5/308<br>(1.6)  | 0.539              | 0.241              | NA                 |
| <i>Anorectal</i>             | 4/128<br>(3.1)  | 5/122<br>(4.1)  | 4/172<br>(2.3)  | 4/172<br>(2.3)  | 6/173<br>(3.5)  | 14/191<br>(7.3)  | 12/207<br>(5.8) | 9/239<br>(3.8)  | 0.492              | 0.784              | NA                 |
| <i>Any anatomical site</i> † | 7/153<br>(4.6)  | 9/160<br>(5.7)  | 15/225<br>(6.8) | 13/218<br>(6.1) | 20/232<br>(8.7) | 27/267<br>(10.3) | 27/293<br>(9.6) | 22/330<br>(7.1) | 0.530              | 0.304              | NA                 |
| <b>Chlamydia</b>             |                 |                 |                 |                 |                 |                  |                 |                 |                    |                    |                    |
| <i>Urethral</i> *            | 4/163<br>(2.5)  | 11/172<br>(6.4) | 12/230<br>(5.2) | 5/219<br>(2.3)  | 10/247<br>(4.0) | 12/271<br>(4.4)  | 6/275<br>(2.2)  | 13/308<br>(4.2) | 0.667              | 0.778              | NA                 |
| <i>Anorectal</i>             | 10/128<br>(7.8) | 9/122<br>(7.4)  | 6/173<br>(3.5)  | 4/172<br>(2.3)  | 10/173<br>(5.8) | 11/191<br>(5.8)  | 14/206<br>(6.8) | 19/239<br>(7.9) | 0.010              | 0.320              | NA                 |
| <i>Any anatomical site</i> † | 14/165<br>(8.5) | 15/173<br>(8.7) | 17/233<br>(7.3) | 9/227<br>(4.0)  | 19/249<br>(7.6) | 21/273<br>(7.7)  | 17/277<br>(6.1) | 29/310<br>(9.4) | 0.057              | 0.627              | NA                 |
| <b>Syphilis</b>              | 1/112<br>(0.9)  | 4/166<br>(2.4)  | 6/223<br>(2.7)  | 13/211<br>(6.2) | 7/238<br>(2.9)  | 19/259<br>(7.3)  | 12/265<br>(4.5) | 19/299<br>(6.4) | -                  | -                  | 0.004              |
| <b>HIV (new diagnosis)</b> ‡ | 1/140<br>(0.7)  | 3/166<br>(1.8)  | 1/222<br>(0.5)  | 1/205<br>(0.5)  | 2/237<br>(0.8)  | 0/252<br>(0.0)   | 1/258<br>(0.4)  | 1/294<br>(0.3)  | -                  | -                  | 0.127              |

Note. *n* represents the number of MSM with a positive result and *N* the number of MSM tested; NA: not applicable; MSM: men who have sex with men; \*Before 2015, urethral gonorrhoea testing was only performed among symptomatic MSM with urethral symptoms or self-reported as contact of infection. The number of people tested corresponds to the number of people tested for urethral chlamydia; † Any anatomical site for gonorrhoea includes urethral, anorectal and oropharyngeal; while any site for chlamydia includes urethral and anorectal; ‡ Only including HIV cases diagnosed on the day of the first visit.

**Table S6** Positivity for gonorrhoea, chlamydia, syphilis and HIV among men who have sex with men only and men who have sex with men and women attending a sexual health centre in Melbourne, 2011-2018.

|                                | MSMO               | MSMW-M        | MSMW-W       | Comparison across three groups | Comparison between MSMW-M and MSM-W |
|--------------------------------|--------------------|---------------|--------------|--------------------------------|-------------------------------------|
|                                | n/N (%)            | n/N (%)       | n/N (%)      | P value                        | P value                             |
| <b>Gonorrhoea</b>              |                    |               |              |                                |                                     |
| <i>Oropharyngeal</i>           | 682/11,810 (5.8)   | 44/756 (5.8)  | 18/676 (2.7) | 0.003                          | 0.003                               |
| <i>Urethral</i> *              | 390/11,699 (3.3)   | 25/771 (3.2)  | 23/801 (2.9) | 0.775                          | 0.669                               |
| <i>Rectum</i>                  | 745/11,080 (6.7)   | 40/682 (5.9)  | 14/515 (2.7) | 0.001                          | 0.009                               |
| <i>Any anatomical site</i>     | 1321/11,951 (11.1) | 83/771 (10.8) | 45/756 (6.0) | <0.001                         | 0.001                               |
| <b>Chlamydia</b>               |                    |               |              |                                |                                     |
| <i>Urethral</i>                | 410/11,699 (3.5)   | 27/771 (3.5)  | 37/801 (4.6) | 0.257                          | 0.262                               |
| <i>Anorectal</i>               | 989/11,043 (9.0)   | 56/683 (8.2)  | 16/514 (3.1) | <0.001                         | <0.001                              |
| <i>Any anatomical site</i> †   | 1272/11,891 (10.7) | 74/779 (9.5)  | 49/812 (6.0) | <0.001                         | 0.010                               |
| <b>Syphilis</b>                | 797/11,317 (7.0)   | 36/737 (4.9)  | 25/744 (3.4) | <0.001                         | 0.140                               |
| <b>HIV (new diagnosis)</b> ‡   | 262/11,102 (2.4)   | 7/738 (0.9)   | 3/749 (0.4)  | <0.001                         | 0.196                               |
| <b>HIV (previous positive)</b> | 316/12,795 (2.5)   | 6/804 (0.7)   | 1/839 (0.1)  | <0.001                         | 0.051                               |

Note. *n* represents the number of MSM with a positive result and *N* the number of MSM tested. MSM: men who have sex with men; \*Before 2015, urethral gonorrhoea testing was only performed among symptomatic MSM with urethral symptoms or self-reported as contact of infection. The number of people tested corresponds to the number of people tested for urethral chlamydia; † Any anatomical site for gonorrhoea includes urethral, anorectal and oropharyngeal; while any site for chlamydia includes urethral and anorectal; ‡ Only including HIV cases diagnosed on the day of the first visit.

STROBE Statement—Checklist of items that should be included in reports of *cross-sectional studies*

|                              | Item No | Recommendation                                                                                                                                                                                    | Page, lines                                      |
|------------------------------|---------|---------------------------------------------------------------------------------------------------------------------------------------------------------------------------------------------------|--------------------------------------------------|
| <b>Title and abstract</b>    | 1       | (a) Indicate the study's design with a commonly used term in the title or the abstract                                                                                                            | 1, 3                                             |
|                              |         | (b) Provide in the abstract an informative and balanced summary of what was done and what was found                                                                                               | 3, 1-25<br>4, 1-3                                |
| <b>Introduction</b>          |         |                                                                                                                                                                                                   |                                                  |
| Background/rationale         | 2       | Explain the scientific background and rationale for the investigation being reported                                                                                                              | 6, 1-14                                          |
| Objectives                   | 3       | State specific objectives, including any prespecified hypotheses                                                                                                                                  | 6, 16-23                                         |
| <b>Methods</b>               |         |                                                                                                                                                                                                   |                                                  |
| Study design                 | 4       | Present key elements of study design early in the paper                                                                                                                                           | 7, 1-3                                           |
| Setting                      | 5       | Describe the setting, locations, and relevant dates, including periods of recruitment, exposure, follow-up, and data collection                                                                   | 7, 1-13                                          |
| Participants                 | 6       | (a) Give the eligibility criteria, and the sources and methods of selection of participants                                                                                                       | 7, 15-19                                         |
| Variables                    | 7       | Clearly define all outcomes, exposures, predictors, potential confounders, and effect modifiers. Give diagnostic criteria, if applicable                                                          | 7, 20-24<br>8, 1-18                              |
| Data sources/<br>measurement | 8*      | For each variable of interest, give sources of data and details of methods of assessment (measurement). Describe comparability of assessment methods if there is more than one group              | 7, 5-13<br>7, 20-24                              |
| Bias                         | 9       | Describe any efforts to address potential sources of bias                                                                                                                                         | 7, 17-19<br>8, 20-25                             |
| Study size                   | 10      | Explain how the study size was arrived at                                                                                                                                                         | NA,<br>all eligible<br>subjects were<br>included |
| Quantitative variables       | 11      | Explain how quantitative variables were handled in the analyses. If applicable, describe which groupings were chosen and why                                                                      | 7, 19-24<br>8, 1-2                               |
| Statistical methods          | 12      | (a) Describe all statistical methods, including those used to control for confounding                                                                                                             | 9, 8-25                                          |
|                              |         | (b) Describe any methods used to examine subgroups and interactions                                                                                                                               | 9, 17-25                                         |
|                              |         | (c) Explain how missing data were addressed                                                                                                                                                       | 9, 23-24                                         |
|                              |         | (d) If applicable, describe analytical methods taking account of sampling strategy                                                                                                                | NA,<br>all eligible<br>subjects were<br>included |
|                              |         | (e) Describe any sensitivity analyses                                                                                                                                                             | NA                                               |
| <b>Results</b>               |         |                                                                                                                                                                                                   |                                                  |
| Participants                 | 13*     | (a) Report numbers of individuals at each stage of study—eg numbers potentially eligible, examined for eligibility, confirmed eligible, included in the study, completing follow-up, and analysed | 10, 13-20                                        |
|                              |         | (b) Give reasons for non-participation at each stage                                                                                                                                              | 10, 13-20                                        |
|                              |         | (c) Consider use of a flow diagram                                                                                                                                                                | NA                                               |

|                          |     |                                                                                                                                                                                                              |                                               |
|--------------------------|-----|--------------------------------------------------------------------------------------------------------------------------------------------------------------------------------------------------------------|-----------------------------------------------|
| Descriptive data         | 14* | (a) Give characteristics of study participants (eg demographic, clinical, social) and information on exposures and potential confounders                                                                     | 10, 24-25<br>11, 1-4                          |
|                          |     | (b) Indicate number of participants with missing data for each variable of interest                                                                                                                          | Table 1, Table S1                             |
| Outcome data             | 15* | Report numbers of outcome events or summary measures                                                                                                                                                         | 10, 20-22<br>11, 6-25<br>12, 1-25<br>13, 1-12 |
| Main results             | 16  | (a) Give unadjusted estimates and, if applicable, confounder-adjusted estimates and their precision (eg, 95% confidence interval). Make clear which confounders were adjusted for and why they were included | Table 4, Table 5<br>11, 14-17                 |
|                          |     | (b) Report category boundaries when continuous variables were categorized                                                                                                                                    | 11, 15-19                                     |
|                          |     | (c) If relevant, consider translating estimates of relative risk into absolute risk for a meaningful time period                                                                                             | NA                                            |
| Other analyses           | 17  | Report other analyses done—eg analyses of subgroups and interactions, and sensitivity analyses                                                                                                               | 13, 18-23                                     |
| <b>Discussion</b>        |     |                                                                                                                                                                                                              |                                               |
| Key results              | 18  | Summarise key results with reference to study objectives                                                                                                                                                     | 14, 1-11                                      |
| Limitations              | 19  | Discuss limitations of the study, taking into account sources of potential bias or imprecision. Discuss both direction and magnitude of any potential bias                                                   | 16, 22-25<br>17, 1-15                         |
| Interpretation           | 20  | Give a cautious overall interpretation of results considering objectives, limitations, multiplicity of analyses, results from similar studies, and other relevant evidence                                   | 15, 1-24<br>17, 18-24<br>16, 1-16             |
| Generalisability         | 21  | Discuss the generalisability (external validity) of the study results                                                                                                                                        | 17, 4-8                                       |
| <b>Other information</b> |     |                                                                                                                                                                                                              |                                               |
| Funding                  | 22  | Give the source of funding and the role of the funders for the present study and, if applicable, for the original study on which the present article is based                                                | 20, 12-15                                     |

\*Give information separately for exposed and unexposed groups.

**Note:** An Explanation and Elaboration article discusses each checklist item and gives methodological background and published examples of transparent reporting. The STROBE checklist is best used in conjunction with this article (freely available on the Web sites of PLoS Medicine at <http://www.plosmedicine.org/>, Annals of Internal Medicine at <http://www.annals.org/>, and Epidemiology at <http://www.epidem.com/>). Information on the STROBE Initiative is available at [www.strobe-statement.org](http://www.strobe-statement.org).

# BMJ Open

**Trends and differences in sexual practices and sexually transmitted infections in men who have sex with men only (MSMO) and men who have sex with men and women (MSMW): a repeated cross-sectional study in Melbourne, Australia**

|                                 |                                                                                                                                                                                                                                                                                                                                                                                                                                                                                                                                                                                                                                                                  |
|---------------------------------|------------------------------------------------------------------------------------------------------------------------------------------------------------------------------------------------------------------------------------------------------------------------------------------------------------------------------------------------------------------------------------------------------------------------------------------------------------------------------------------------------------------------------------------------------------------------------------------------------------------------------------------------------------------|
| Journal:                        | <i>BMJ Open</i>                                                                                                                                                                                                                                                                                                                                                                                                                                                                                                                                                                                                                                                  |
| Manuscript ID                   | bmjopen-2020-037608.R2                                                                                                                                                                                                                                                                                                                                                                                                                                                                                                                                                                                                                                           |
| Article Type:                   | Original research                                                                                                                                                                                                                                                                                                                                                                                                                                                                                                                                                                                                                                                |
| Date Submitted by the Author:   | 19-Oct-2020                                                                                                                                                                                                                                                                                                                                                                                                                                                                                                                                                                                                                                                      |
| Complete List of Authors:       | Martin-Sanchez, Mario; Melbourne Sexual Health Centre; Preventive Medicine and Public Health Training Unit PSMar-UPF-ASPB , Case, Richard; Melbourne Sexual Health Centre<br>Fairley, Christopher; Melbourne Sexual Health Centre; Monash University Central Clinical School<br>Hocking, Jane; University of Melbourne, Melbourne School of Population and Global Health<br>Bradshaw, Catriona; Melbourne Sexual Health Centre<br>Ong, Jason; Melbourne Sexual Health Centre; Monash University Central Clinical School<br>Chen, Marcus; Melbourne Sexual Health Centre<br>Chow, Eric; Melbourne Sexual Health Centre; Monash University Central Clinical School |
| <b>Primary Subject Heading</b>: | Sexual health                                                                                                                                                                                                                                                                                                                                                                                                                                                                                                                                                                                                                                                    |
| Secondary Subject Heading:      | Epidemiology, Infectious diseases, HIV/AIDS                                                                                                                                                                                                                                                                                                                                                                                                                                                                                                                                                                                                                      |
| Keywords:                       | SEXUAL MEDICINE, Epidemiology < INFECTIOUS DISEASES, Public health < INFECTIOUS DISEASES, HIV & AIDS < INFECTIOUS DISEASES                                                                                                                                                                                                                                                                                                                                                                                                                                                                                                                                       |
|                                 |                                                                                                                                                                                                                                                                                                                                                                                                                                                                                                                                                                                                                                                                  |

SCHOLARONE™  
Manuscripts

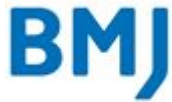

I, the Submitting Author has the right to grant and does grant on behalf of all authors of the Work (as defined in the below author licence), an exclusive licence and/or a non-exclusive licence for contributions from authors who are: i) UK Crown employees; ii) where BMJ has agreed a CC-BY licence shall apply, and/or iii) in accordance with the terms applicable for US Federal Government officers or employees acting as part of their official duties; on a worldwide, perpetual, irrevocable, royalty-free basis to BMJ Publishing Group Ltd ("BMJ") its licensees and where the relevant Journal is co-owned by BMJ to the co-owners of the Journal, to publish the Work in this journal and any other BMJ products and to exploit all rights, as set out in our [licence](#).

The Submitting Author accepts and understands that any supply made under these terms is made by BMJ to the Submitting Author unless you are acting as an employee on behalf of your employer or a postgraduate student of an affiliated institution which is paying any applicable article publishing charge ("APC") for Open Access articles. Where the Submitting Author wishes to make the Work available on an Open Access basis (and intends to pay the relevant APC), the terms of reuse of such Open Access shall be governed by a Creative Commons licence – details of these licences and which [Creative Commons](#) licence will apply to this Work are set out in our licence referred to above.

Other than as permitted in any relevant BMJ Author's Self Archiving Policies, I confirm this Work has not been accepted for publication elsewhere, is not being considered for publication elsewhere and does not duplicate material already published. I confirm all authors consent to publication of this Work and authorise the granting of this licence.



1  
2  
3 **Trends and differences in sexual practices and sexually transmitted infections in men**  
4 **who have sex with men only (MSMO) and men who have sex with men and women**  
5 **(MSMW): a repeated cross-sectional study in Melbourne, Australia**  
6  
7  
8  
9

10 Mario Martín-Sánchez,<sup>1,2</sup> Richard Case,<sup>1</sup> Christopher K. Fairley,<sup>1,3</sup> Jane S. Hocking,<sup>4</sup>  
11  
12 Catriona S. Bradshaw,<sup>1,3</sup> Jason J. Ong,<sup>1,3</sup> Marcus Y. Chen,<sup>1,3</sup> Eric P.F. Chow<sup>1,3,4</sup>  
13  
14

- 15 1. Melbourne Sexual Health Centre, Alfred Health, Melbourne, Victoria, Australia
- 16 2. Preventive Medicine and Public Health Training Unit PSMar-UPF-ASPB, Barcelona,  
17 Spain
- 18 3. Central Clinical School, Monash University, Melbourne, Victoria, Australia
- 19 4. Melbourne School of Population and Global Health, The University of Melbourne,  
20 Carlton, Victoria, Australia
- 21
- 22
- 23
- 24
- 25
- 26

27 **Email:**

28  
29 MMS: [mario.martin04@estudiant.upf.edu](mailto:mario.martin04@estudiant.upf.edu)

30  
31 RC: [r.case@student.unimelb.edu.au](mailto:r.case@student.unimelb.edu.au)

32  
33 CKF: [cfairley@mshc.org.au](mailto:cfairley@mshc.org.au)

34  
35 JSH: [j.hocking@unimelb.edu.au](mailto:j.hocking@unimelb.edu.au)

36  
37 CSB: [Catriona.bradshaw@monash.edu](mailto:Catriona.bradshaw@monash.edu)

38  
39 JJO: [jong@mshc.org.au](mailto:jong@mshc.org.au)

40  
41 MYC: [mchen@mshc.org.au](mailto:mchen@mshc.org.au)

42  
43 EPFC: [eric.chow@monash.edu](mailto:eric.chow@monash.edu)  
44  
45  
46  
47  
48  
49  
50  
51  
52  
53  
54  
55  
56  
57  
58  
59  
60

1  
2  
3 **Address for correspondence:**  
4

5 Associate Professor Eric P.F. Chow, PhD, MPH.

6 Melbourne Sexual Health Centre, 580 Swanston Street, Carlton, VIC 3053, Australia,  
7

8 Phone: +61 (3) 9341-6233, email: [eric.chow@monash.edu](mailto:eric.chow@monash.edu)  
9

10  
11  
12 *Or*  
13

14  
15 Dr Mario Martín-Sánchez, MBBS, MPH.

16  
17 Public Health Agency of Barcelona, Pl. Lesseps 1, 08023, Barcelona, Spain.

18  
19 Phone: +34 932 384 545, email: [mario.martin04@estudiant.upf.edu](mailto:mario.martin04@estudiant.upf.edu)  
20

21  
22 **Keywords:** Bisexuality, bisexual, gay, homosexual, female, sexual behaviours, men who  
23 have sex with men, Sexually Transmitted Diseases, HIV, Syphilis, gonorrhoea, chlamydia,  
24 bisexual, condom  
25  
26  
27  
28  
29  
30  
31  
32  
33  
34  
35  
36  
37  
38  
39  
40  
41  
42  
43  
44  
45  
46  
47  
48  
49  
50  
51  
52  
53  
54  
55  
56  
57  
58  
59  
60

## ABSTRACT

### Objectives

In the last decade, there has been an increase in sexually transmitted infections (STI) in men who have sex with men (MSM) in Australia, and since 2015 also in urban heterosexuals. Men who have sex with men and women (MSMW) have characteristics that may differ from both MSM only (MSMO) and heterosexual men. We aimed to compare the sexual practices and the trends in HIV/STI positivity between MSMO and MSMW.

### Design

Repeated cross-sectional study.

### Setting

Sexual Health Centre in Australia.

### Participants

MSM aged 18 years and above who attended Melbourne Sexual Health Centre for the first time between 2011 and 2018. This includes 12,795 MSMO and 1,979 MSMW.

### Primary outcome measures

Prevalence of sexual practices and HIV/STI positivity.

### Results

Compared to MSMW, MSMO were more likely to practice anal sex and to have condomless receptive anal sex with casual male partners, and less likely to have a current regular relationship. Over the 8-year period, there was an increase in condomless receptive anal sex with casual male partners for both groups (MSMO: 46.2% to 63.3%,  $P_{\text{trend}} < 0.001$ ; MSMW: 41.3% to 57.9%,  $P_{\text{trend}} = 0.011$ ). Syphilis positivity increased in MSMO (5.5% to 7.8%,  $P_{\text{trend}} = 0.012$ ) and MSMW (from 0.9% to 6.4%,  $P_{\text{trend}} = 0.004$ ), and HIV remained stable. Gonorrhoea increased among MSMO from 2011 to 2014 (from 6.7% to 9.6%,  $P_{\text{trend}} = 0.002$ ), and remained stable from 2015 to 2018. MSMO had higher odds of testing positive for

1  
2  
3 gonorrhoea (adjusted odd ratio [aOR] 1.36, 95% confidence interval [CI] 1.13 to 1.64),  
4  
5 chlamydia (aOR 1.39, 95%CI 1.16 to 1.67), syphilis (aOR 1.74, 95%CI 1.37 to 2.22) and  
6  
7 HIV (aOR 4.60, 95%CI 2.43 to 8.70) than MSMW.  
8  
9

### 10 **Conclusions**

11  
12 MSMW have overall lower condomless sex and lower HIV/STI positivity. In the last years,  
13  
14 changes in sexual practices in MSM have affected both MSMW and MSMO leading to an  
15  
16 increased STI risk.  
17  
18  
19  
20  
21  
22  
23  
24  
25  
26  
27  
28  
29  
30  
31  
32  
33  
34  
35  
36  
37  
38  
39  
40  
41  
42  
43  
44  
45  
46  
47  
48  
49  
50  
51  
52  
53  
54  
55  
56  
57  
58  
59  
60

For peer review only

## ARTICLE SUMMARY

### Strengths and limitations of this study

- We compared sexual practices and HIV/sexually transmitted infections positivity in a high number of men who have sex with men only (N=12,795) and men who have sex with men and women (N=1,979) over an 8-year period.
- We provide a comprehensive description of sexual practices distinguishing between condom use with regular or casual sexual partners, and in receptive or insertive anal sex.
- The study was conducted in one urban major sexual health clinic and it is possible that our findings may not be generalizable to other settings.
- We were unable to analyse the statistical significance of the temporal trends during the whole study period for gonorrhoea and chlamydia due to a change in the diagnostic test in 2015.

## INTRODUCTION

Despite considerable public health efforts and biomedical advances,<sup>1</sup> the rate of sexually transmitted infections (STIs) is increasing at an alarming rate particularly among gay, bisexual and other men who have sex with men (MSM) worldwide.<sup>2</sup> Among the Australian population, the notification rate, defined as the number of new cases reported to the national infectious diseases surveillance system, increased an 80% for gonorrhoea (from 65.5 to 118.0 per 100,000), a 14% for chlamydia (from 364.5 to 416.8 per 100,000) and has more than doubled for syphilis (from 7.8 to 18.3 per 100,000) between 2013 and 2017.<sup>3</sup> In males, most of the early rises in gonorrhoea and syphilis were accounted for by rises in MSM. However, in late 2010s, there has been a dramatic increase in both infections in the Australian heterosexual population to levels not seen since the 1980's. In stark contrast to the rise in the notification rate of gonorrhoea and syphilis, there has been an 11% decline in the HIV notification rate from 4.5 per 100,000 in 2013 to 4.0 in 2017 among MSM in Australia, with most of the reduction occurring between 2016 and 2017 after the introduction of pre-exposure prophylaxis (PrEP) in late 2016.<sup>3-5</sup>

Past studies have shown that sexual practices among MSM have changed over time (e.g. an increase in condomless anal sex).<sup>6-9</sup> However, there have been very limited studies examining whether there are any differences in sexual practices between men who have sex with men only (MSMO) and men who have sex with men and women (MSMW or bisexual MSM).<sup>10-12</sup> Therefore, this study aimed to compare the characteristics and sexual practices, and describe the trends in HIV/STI positivity in MSMO and MSMW attending a large sexual health clinic in Melbourne between 2011 and 2018. Additionally, we aimed to explore differences within MSMW depending on the most frequent gender of their sexual partners.

## METHODS

We conducted a repeated cross-sectional analysis of retrospective data of MSM attending the Melbourne Sexual Health Centre (MSHC), Australia, between 2011 and 2018. MSHC is a public clinic that offers a range of free clinical services regarding sexual health. MSHC is the largest sexual health clinic in Victoria and provides more than 50,000 clinical consultations a year, approximately 40% of clients are MSM.<sup>4</sup> Upon arrival, all clients are invited to complete a questionnaire via computer-assisted self-interviewing (CASI), which collects client's demographic characteristics (e.g. age, country of birth, Aboriginal and Torres Strait Islander status), sexual practices (i.e. gender of partners, type of partners [regular or casual], number of partners, condom use and anal sex practice [receptive anal sex (RAS) and insertive anal sex (IAS)]), sex work status and injecting drug use behaviour. Data on sexual practices and injecting drug use were measured in the past 12 months, and sex work status was defined as clients who had ever worked in the sex industry during lifetime. Clients are allowed to decline to answer any questions they may wish to.

Clients who were male, aged 18 years and above, reported having sex with another man in the past 12 months, and attended MSHC for the first time between 2011 and 2018 were included in this analysis. We only included data from the client's first visit to MSHC to avoid any bias including men with repeated visits as they might be at a higher risk of HIV/STI with different sexual practices. We categorised MSM into two main categories based on their self-reported sexual practices: (1) MSMO, and (2) MSMW. We further categorised MSMW into two groups: (1) MSM who reported more female partners than male partners in the past 12 months (MSMW-W); and (2) MSM who reported more male partners than female partners in the past 12 months (MSMW-M) and compared the characteristics between the two groups. Men with an equal number of male and female partners in the past 12 months (N=336) were

1  
2  
3 excluded in the comparisons among MSMW subgroups but they were included in the overall  
4  
5 MSMW category.  
6  
7  
8  
9

10 We also extracted the HIV/STI testing results on the day. STI testing results included syphilis  
11 (serologically confirmed by rapid plasma regain test [RPR], *T. pallidum* enzyme  
12 immunoassay [EIA] and *T. pallidum* particle agglutination assay [TPPA], and including all  
13 syphilis stages), gonorrhoea (stratified by anatomical site: anorectal, urethral and  
14 oropharyngeal) and chlamydia (stratified by anatomical site: anorectal and urethral). For  
15 HIV, we analysed separately incident cases (diagnosed on the day of the first visit using  
16 screening assay followed by a confirmatory Western Blot assay) and MSM with a previous  
17 HIV diagnosis visiting MSHC for the first time. There was a major change in gonorrhoea and  
18 chlamydia testing at our clinic.<sup>13</sup> Prior to 2015, gonorrhoea was diagnosed by using culture  
19 and chlamydia was diagnosed by nucleic acid amplification test (NAAT) using the BD  
20 ProbeTec Strand Displacement Amplification Assay (Becton, Dickinson and Co., Sparks,  
21 MD, USA). From March 2015 onwards, testing for both gonorrhoea and chlamydia was  
22 performed using the Aptima Combo 2 Transcription-Mediated Amplification Assay (AC2)  
23 (Hologic Gen-Probe, San Diego, CA, USA). HIV and syphilis testing methods did not change  
24 during the study period.  
25  
26  
27  
28  
29  
30  
31  
32  
33  
34  
35  
36  
37  
38  
39  
40  
41  
42  
43  
44  
45  
46

47 Before July 2015, screening for urethral gonorrhoea was only performed in MSM with  
48 urethral symptoms while screening for urethral chlamydia was performed in all MSM as per  
49 the Australian guidelines.<sup>14</sup> However, since July 2015, all MSM were screened for both  
50 urethral gonorrhoea and chlamydia regardless of the presence of symptoms as per our clinic  
51 policy.<sup>15</sup> Therefore, the positivity for urethral gonorrhoea was calculated as the number of  
52 men tested positive divided by the number of men who were tested for urethral chlamydia to  
53  
54  
55  
56  
57  
58  
59  
60



1  
2  
3 avoid the bias of testing urethral gonorrhoea only among symptomatic MSM until July 2015,  
4 and this approach was also used elsewhere.<sup>16</sup> In addition, routine screening for oropharyngeal  
5 chlamydia among all MSM at MSHC were introduced in April 2017; before then, only MSM  
6 who reported as a contact of infection were tested. Routine screening for HIV, syphilis,  
7 oropharyngeal and anorectal gonorrhoea, and anorectal chlamydia were conducted among all  
8 MSM and the screening guidelines did not change over the study period at MSHC.  
9

10  
11  
12  
13  
14  
15  
16  
17  
18  
19 Chi-squared test was used to compare the demographic characteristics and sexual practices  
20 between risk groups. We examined the annual trends of sexual practices and HIV/STI  
21 positivity for MSMO and MSMW using chi-squared trend test. Annual trends for condomless  
22 IAS and RAS with casual male partners were examined separately. We reported any  
23 condomless sex (i.e. IAS and/or RAS) with regular male partners for the trend analysis due to  
24 the small number of participants who reported having regular male partners. For chlamydia  
25 and gonorrhoea positivity, we calculated the annual trends for 2011-2014 and 2015-2018  
26 separately due to the change of the diagnostic assays. Univariable and multivariable logistic  
27 regression was used to examine the association between sexual practice (MSMW or MSMO)  
28 and HIV/STI positivity. We assessed HIV and each STI separately, and this included (1)  
29 gonorrhoea at any anatomical site, (2) chlamydia at any anatomical site, (3) syphilis, (4) new  
30 HIV diagnosis on the day of the first visit and (5) previous HIV diagnosis as the dependent  
31 variables. Therefore, five different logistic regression models were conducted, and the  
32 independent variables included sexual practice (being MSMW or MSMO and using MSMW  
33 as reference), the year of the visit and all potential confounding factors (i.e., variables with  
34  $P < 0.20$  in the univariable analyses) in the multivariable analysis. Missing data were presented  
35 as 'no information'. We repeated the same procedure using sexual practice categorised in  
36 MSMO, MSMW-M and MSMW-W as the independent variable with MSMW-W as the  
37  
38  
39  
40  
41  
42  
43  
44  
45  
46  
47  
48  
49  
50  
51  
52  
53  
54  
55  
56  
57  
58  
59  
60

1  
2  
3 reference group. We reported the crude odds ratio (OR) and adjusted odds ratio (aOR), and  
4  
5 their respective 95% confidence intervals (CI). The 0.05 level was used for statistical  
6  
7 significance in all the analysis. All statistical analyses were conducted using SPSS V.25. This  
8  
9 study was approved by the Alfred Hospital Ethics Committee, Melbourne, Australia (project  
10  
11 number 83/18).  
12  
13  
14  
15  
16

### 17 ***Patient and Public Involvement***

18  
19 Patients were not directly involved in this study; only data gathered retrospectively and  
20  
21 coming from electronic health records was used.  
22  
23  
24  
25

## 26 **RESULTS**

### 27 ***Demographic characteristics***

28  
29 There were 18,851 MSM attending MSHC for the first time between 2011 and 2018. We  
30  
31 excluded 1,909 MSM (10.1%) who had had sexual contact with another man but declined to  
32  
33 report the number of male sexual partners, 1,630 MSM (8.6%) who reported no male sexual  
34  
35 partner in the past 12 months at the current visit but had reported male partners at subsequent  
36  
37 visit at the clinic, and 538 (2.9%) duplicate records from the same individual on the same  
38  
39 day. The remaining 14,774 men were included in this data analysis, and the number of men  
40  
41 increased from 1,215 in 2011 to 2,468 in 2018 but the proportion of MSMW remained stable  
42  
43 over the period (Table 1). Overall, there were 12,795 MSMO (86.6%) and 1,979 MSMW  
44  
45 (13.4%). Among 1,979 MSMW, 804 (40.6%) were MSMW-W, 839 (42.4%) MSMW-M and  
46  
47 336 (17.0%) had an equal number of male and female partners in the past 12 months.  
48  
49  
50  
51  
52  
53  
54  
55

56 Among the 14,774 MSM, the median age was 27 years (interquartile range, IQR: 23-33) and  
57  
58 MSMW were slightly older than MSMO (median age: 29 *versus* 27;  $P < 0.001$ ) (Table 2). The  
59  
60

1  
2  
3 proportion of men born in Australia was higher in MSMW than in MSMO (55.3% *versus*  
4 48.5%,  $P < 0.001$ ). The proportion of injecting drug use in the past 12 months was higher in  
5 MSMW than MSMO (2.0% *versus* 1.6%,  $P = 0.032$ ; Table 2); and it was similar between  
6 MSMW-W and MSMW-M (2.5% *versus* 2.1%,  $P = 0.777$ ; Table S1).  
7  
8  
9

### 14 ***Sexual practices***

16  
17 The proportion of men who reported sex overseas in the past 12 months was comparable  
18 between MSMW and MSMO (37.1% *versus* 34.5%;  $P = 0.060$ ); and more MSMW-W (43.0%)  
19 reported sex overseas than MSMW-M (34.6%;  $P = 0.002$ ) (Table S1). Less than half (40.1%)  
20 of MSMO had a male regular partner. Among MSMW, 8.5% had a regular male partner,  
21 33.5% a regular female partner, and 4.6% had regular male and female partners (Table 2).  
22  
23  
24  
25  
26  
27  
28  
29

30  
31 The median number sexual partners (regardless gender of the partners) in the past 12 months,  
32 was higher among MSMW (7, interquartile range [IQR]: 5-12 in MSMW-M; and 6, IQR: 4-  
33 11 in MSMW-W) than MSMO (5, IQR: 3-10;  $P < 0.001$ ) (Table S1). The proportion of men  
34 with  $\geq 5$  sexual partners increased significantly in MSMW (from 63.1% in 2011 to 70.2% in  
35 2018,  $P_{\text{trend}} = 0.014$ ), as well as in MSMO (from 50.8% to 56.4%;  $P_{\text{trend}} = 0.002$ ) (Table S2-  
36 S3). In addition, the proportion of MSMW with  $\geq 5$  female sexual partners increased  
37 significantly from 23.2% in 2011 to 29.5% in 2018 ( $P_{\text{trend}} = 0.039$ ) (Table S3).  
38  
39  
40  
41  
42  
43  
44  
45  
46  
47  
48

49 Anal sex practices with casual male partners varied between MSMO and MSMW. The  
50 proportion of MSMO having RAS only with casual male partners was higher (9.9%) than in  
51 MSMW (6.6%); however, the proportion of MSMO having IAS only with casual male  
52 partners was lower (10.5%) than in MSMW (14.2%;  $P < 0.001$ ). Condomless anal sex with  
53 casual male partners in the past 12 months was more common in MSMO than in MSMW for  
54  
55  
56  
57  
58  
59  
60

1  
2  
3 RAS (53.8% *versus* 49.9%;  $P=0.012$ ) but there was no significant difference in IAS. Two-  
4  
5 thirds (67.5%) of MSMW had condomless vaginal and/or anal sex with female casual  
6  
7 partners in the past 12 months (Table 2). Among MSMO, condomless RAS with casual male  
8  
9 partners in the past 12 months increased from 46.2% to 63.3% ( $P_{\text{trend}} < 0.001$ ) and IAS from  
10  
11 45.8% to 64.2% ( $P_{\text{trend}} < 0.001$ ) from 2011 to 2018 (Figure 1, Table S2). Similarly, among  
12  
13 MSMW, there was an increase from 41.3% to 57.9% in condomless RAS ( $P_{\text{trend}} = 0.011$ ), the  
14  
15 proportion of condomless IAS with casual male partners did not change during the study  
16  
17 period ( $P_{\text{trend}} = 0.354$ ), and the proportion of condomless sex with casual female partners  
18  
19 remained high and only increased marginally from 65.4% to 71.0% ( $P_{\text{trend}} = 0.056$ ) (Figure 1,  
20  
21 Table S3). MSMW-M compared to MSMW-W showed higher condomless sex with casual  
22  
23 male partners (55.0% *versus* 46.1% for RAS;  $P=0.004$  and 57.0% *versus* 47.1% for IAS;  
24  
25  $P=0.001$ ) and lower condomless sex with casual female partners (60.9% *versus* 75.6%;  
26  
27  $P < 0.001$ ) (Table S1).

28  
29  
30  
31  
32  
33  
34  
35 Regarding regular male partners, both condomless RAS and condomless IAS were more  
36  
37 commonly reported in MSMO (RAS: 71.5%; IAS: 71.4%) than in MSMW (RAS 62.9%;  
38  
39 IAS: 63.5%;  $P=0.005$ ;  $P=0.010$ ) (Table 1) and condomless anal sex regardless of IAS or  
40  
41 RAS, increased from 69.2% to 78.4% in MSMO ( $P_{\text{trend}} < 0.001$ ) but not in MSMW ( $P_{\text{trend}}$   
42  
43  $= 0.435$ ) (Figure 1, Tables S2-S3).

### 44 45 46 47 48 49 ***HIV/STI positivity***

50  
51 Overall, MSMO had a higher HIV, syphilis, gonorrhoea and chlamydia positivity than  
52  
53 MSMW. MSMO had higher extra-genital gonorrhoea and chlamydia positivity than MSMW;  
54  
55 however, the positivity for urethral gonorrhoea and urethral chlamydia did not differ between  
56  
57 the two groups (Table 3). In the period 2011-2014, there was an increase in oropharyngeal  
58  
59  
60

1  
2  
3 and anorectal and oropharyngeal gonorrhoea among MSMO, while chlamydia remained  
4 stable. There was no increase in gonorrhoea and chlamydia positivity in the period 2015-2018  
5  
6 in either group (Tables S4-S5). Among MSMW, MSMW-M had higher extra-genital  
7  
8 gonorrhoea and chlamydia positivity but similar urethral gonorrhoea and chlamydia, HIV and  
9  
10 syphilis compared to MSMW-W (Table S6).  
11  
12  
13  
14  
15  
16

17 There was a 41.8% increase in syphilis positivity from 5.5% (43/778) in 2011 to 7.8%  
18  
19 (152/1917) in 2018 ( $P_{\text{trend}}=0.012$ ) in MSMO (Table S4) and more than a six-fold increase in  
20  
21 syphilis positivity from 0.9% (1/112) in 2011 to 6.4% (19/299) in 2018 ( $P_{\text{trend}}=0.004$ ) in  
22  
23 MSMW, although the number of infections remained low in this group (Figure 2, Table S5).  
24  
25 HIV positivity did not change in either group between 2011 and 2018 (Figure 2, Table S4-  
26  
27 S5).  
28  
29  
30  
31  
32

33 After adjusting for other potential confounding factors, MSMO had higher odds of testing  
34  
35 positive for gonorrhoea at any anatomical site (aOR 1.36, 95% CI 1.13 to 1.64), chlamydia at  
36  
37 any anatomical site (aOR 1.39; 95% CI 1.16 to 1.67), syphilis (aOR 1.74, 95% CI 1.37 to  
38  
39 2.22) and HIV (aOR 4.60, 95% CI 2.43 to 8.70) compared to MSMW (Table 4).  
40  
41

42 Additionally, MSMO had higher odds of testing positive for gonorrhoea at any anatomical  
43  
44 site (aOR 1.58; 95% CI 1.15 to 2.18), chlamydia at any anatomical site (aOR 1.47; 95% CI  
45  
46 1.09 to 1.99), syphilis (aOR 2.11, 95% CI 1.36 to 3.27), and HIV (aOR 5.49, 95% CI 1.74 to  
47  
48 17.30) compared with MSMW-W in the adjusted analysis; however, there was no significant  
49  
50 difference in HIV/STI positivity between MSMW-M and MSMW-W nor MSMW-M and  
51  
52 MSMO (Table 5).  
53  
54  
55  
56  
57

## 58 DISCUSSION

59  
60

1  
2  
3 In this study of 12,795 men who have sex with men only (MSMO) and 1,979 men who have  
4 sex with men and women (MSMW) in Melbourne, Australia, we found significant changes in  
5 sexual practices among MSMW between 2011 and 2018, a period in which rates of STIs had  
6 been increasing in both MSM and the heterosexual population. Specifically, we found that  
7 condom use with casual female partners remained low during the study period and that  
8 condomless anal sex with casual male partners had increased in MSMW, and these results  
9 echo the rise in syphilis positivity over the same period. While some sexual risk practices and  
10 STI positivity were generally lower in MSMW than in MSMO, their rising rates could  
11 indicate more transmission from MSMW to their female partners than had occurred  
12 previously. Clarifying this issue and what factors are causing the rising rates of STIs is likely  
13 to contribute significantly to the design of STI control programs.  
14  
15  
16  
17  
18  
19  
20  
21  
22  
23  
24  
25  
26  
27  
28  
29  
30

31 Several studies have assessed HIV and sexual practices in MSMW, but their results are  
32 conflicting. A meta-analysis published in 2014 concluded that MSMW had a lower HIV  
33 prevalence (16.9%) compared to MSMO (33.3%) but the prevalence is higher than men who  
34 have sex with women only (MSWO) (3.5%), and this is consistent with our findings.<sup>17</sup> The  
35 authors also found that MSMW (15.9%) were less likely to engage in condomless receptive  
36 anal sex compared to MSMO (35.0%).<sup>17</sup> Other factors such as drug and alcohol use, other  
37 risky practices (e.g. group sex, paying for sex), frequent HIV testing and the use of  
38 biomedical interventions (e.g. PrEP and PEP) are also associated with HIV acquisition,<sup>18-20</sup>  
39 and very limited studies examining these factors between MSMO and MSMW. However,  
40 some other studies conducted in different settings, such as China, India and the US, have  
41 shown the risk of HIV among MSMW is similar or even at a higher risk compared to  
42 MSMO.<sup>10,21-23</sup>  
43  
44  
45  
46  
47  
48  
49  
50  
51  
52  
53  
54  
55  
56  
57  
58  
59  
60

1  
2  
3 Our data suggest that MSMO have a higher positivity for syphilis, chlamydia and gonorrhoea  
4 than MSMW; however, the comparison of STI positivity between MSMO and MSMW varies  
5 across published studies. For example, Davis and colleagues (2016) conducted a study among  
6 Chinese MSM showing no differences between MSMW and MSMO in the lifetime  
7 prevalence of syphilis, gonorrhoea, chlamydia and genital warts but a higher prevalence of  
8 genital herpes in MSMW (6.6%) compared to MSMO (0.4%).<sup>23</sup> In the US, MSMW had a  
9 57% increased odds of having an STI compared to heterosexuals, but no differences were  
10 found between MSMO and heterosexuals or MSMO and MSMW.<sup>22</sup> Similarly, an Indian  
11 study has shown that there were no differences in any STI positivity (i.e. either syphilis,  
12 gonorrhoea or chlamydia) between MSMO and MSMW.<sup>21</sup> Furthermore, MSMW are also  
13 less likely to ever have an HIV/STI test compared to MSMO,<sup>21,24,25</sup> which is consistent with  
14 an Australian qualitative study suggesting MSMW have a poor sexual health knowledge  
15 compared to MSMO.<sup>26</sup> Furthermore, the rise in antimicrobial resistance in STI,<sup>27</sup> particularly  
16 gonorrhoea, is of particular concern. Transmission of antimicrobial resistance across risk  
17 populations (e.g. between MSMW and female) may have occurred.<sup>12,28</sup>

18  
19  
20  
21  
22  
23  
24  
25  
26  
27  
28  
29  
30  
31  
32  
33  
34  
35  
36  
37  
38  
39  
40 Our data also show that MSMW are less likely to have RAS with male partners and less  
41 likely to have condomless RAS. These findings may explain the reasons why MSMW have a  
42 lower positivity for anorectal gonorrhoea and chlamydia than MSMO in our study.

43  
44  
45  
46  
47 Importantly, we did not find any significant differences in urethral gonorrhoea and chlamydia  
48 between MSMO and MSMW despite differences in anal sex and condom use. This may be  
49 because some urethral chlamydial infections in MSMW are acquired from women and  
50 urethral gonorrhoea is commonly acquired from no anal sexual activity such as oral sex.<sup>29,30</sup>

51  
52  
53  
54  
55  
56 The disparities of HIV and syphilis positivity between MSMO and MSMW were more  
57  
58  
59  
60

1  
2  
3 pronounced compared to gonorrhoea and chlamydia, and there was a striking increase in  
4  
5 syphilis positivity in both groups.  
6  
7  
8  
9

10 The differential sexual practices and HIV/STI positivity among MSMW<sup>31,32</sup> may also be due  
11  
12 to other health issues such as mental health and substance use, that also place them as an  
13  
14 especially vulnerable population.<sup>33,34</sup> Bisexual men may face unique stressors, such as  
15  
16 specific prejudices against them, pressures or negative attitudes from both heterosexual and  
17  
18 LGBT individuals, which can have a negative impact on their health.<sup>34,35</sup> This factors may  
19  
20 also render bisexual men less likely to discuss their sexual health and disclose their sexual  
21  
22 orientation with their GPs<sup>11</sup> and, hence not receive the appropriate sexual health care and  
23  
24 management. An LGBT-friendly and non-judgemental approach is essential to build up the  
25  
26 trust between clinicians and patients. Furthermore, the current health promotion and  
27  
28 prevention programmes mainly targeting the MSM population as a whole. It is possible that  
29  
30 some MSMW may not be engaged in the LGBT community and hence they may not targeted  
31  
32 with the current programmes. Future public health campaigns and prevention programmes  
33  
34 should also tailor for MSMW via different channels.  
35  
36  
37  
38  
39  
40  
41

42 Our study, including a high number of MSM over an 8-year period, provides relevant and  
43  
44 updated information to understand changes in sexual practices and STI epidemiology  
45  
46 occurring in Australia and across the world. We also provide detailed information regarding  
47  
48 condom use, differencing between both casual or regular partners, and receptive or insertive  
49  
50 anal sex. Nevertheless, there are several limitations in the study that must be considered.  
51  
52 First, data were self-reported by MSHC clients which may influence the results regarding  
53  
54 sexual practices, including the number and gender of the sexual partners due to social  
55  
56 desirability or recall bias. However, the use of a computer-assisted self-interview to collect  
57  
58  
59  
60



1  
2  
3 sexual history at the clinic has shown to improve the accuracy and reduce biased information.  
4  
5 Besides that, data on sexual orientation was not collected and the categorisation of MSMO  
6  
7 and MSMW was based on self-reported sexual practice rather than sexual identity. This  
8  
9 means that MSMW in this study might not define themselves as bisexual men. Second, this  
10  
11 study was conducted in one urban major sexual health clinic. It is possible that MSM  
12  
13 attending a sexual health clinic are more likely to be at increased sexual risk and hence our  
14  
15 findings may not be generalizable to the whole MSM population in Australia or in other  
16  
17 settings. Third, other sexual practices that may increase the risk of HIV/STI (e.g., chemsex,  
18  
19 group sex, rimming or saliva use as a lubricant)<sup>36-38</sup> were not routinely collected in the clinic  
20  
21 and hence not included in the study. Fourth, we only included individuals who attended the  
22  
23 clinic for the first time. Sexual practices might change with age and further longitudinal  
24  
25 cohort studies examining the changes in sexual practices among individuals would be  
26  
27 required. Lastly, we were unable to examine the temporal trends for gonorrhoea and  
28  
29 chlamydia over the 8-year period because we changed the diagnostic test for gonorrhoea and  
30  
31 chlamydia at our clinic in 2015.  
32  
33  
34  
35  
36  
37  
38  
39

## 40 CONCLUSION

41  
42 In our study population, MSMW were a heterogeneous group in which sexual practices and  
43  
44 STI positivity varied between MSMW with mainly female partners and MSMW with mainly  
45  
46 male partners. Compared to MSMO, MSMW were less likely to engage in condomless sex  
47  
48 and had a lower HIV/STI positivity. From 2011 to 2018, changes in the sexual practices in  
49  
50 MSM have affected both MSMW and MSMO leading to an increased risk of STI in both  
51  
52 subgroups. Further studies also including heterosexual men and women are needed to better  
53  
54 understand the recent changes in the STI epidemiology.  
55  
56  
57  
58

## 59 ACKNOWLEDGMENTS

60

1  
2  
3 The authors would like to acknowledge Afrizal Afrizal for his assistance with data extraction  
4  
5 at the Melbourne Sexual Health Centre.  
6  
7  
8  
9

## 10 **CONTRIBUTORSHIP STATEMENT**

11 EPFC and CKF planned, conceived and designed the study. RC conducted some preliminary  
12  
13 analyses. MMS performed the literature review, conducted the statistical analysis and wrote  
14  
15 the first draft of the manuscript. EPFC provided statistical advice and oversaw the study. RC,  
16  
17 CKF, JSH, CSB, JJO, MYC and EPFC assisted with data interpretation. MMS, RC, CKF,  
18  
19 JSH, CSB, JJO, MYC and EPFC critically revised it for important intellectual content and  
20  
21 approved the final version of the manuscript.  
22  
23  
24  
25

## 26 **COMPETING INTERESTS**

27  
28 None declared.  
29

## 30 **FUNDING**

31  
32 EPFC was supported by the Australian National Health and Medical Research Council Early  
33  
34 Career Fellowship (GNT1091226). The funder had no role in the study design, collection of  
35  
36 data, writing, or decision to submit the paper for publication.  
37  
38  
39  
40

## 41 **DATA SHARING STATEMENT**

42  
43 All data relevant to the study are included in the article or uploaded as supplementary  
44  
45 information.  
46  
47  
48

## 49 **REFERENCES**

- 50  
51 1. World Health Organization. *Report on Global Sexually Transmitted Infection*  
52  
53 *Surveillance, 2018*. (World Health Organization, ed.). Geneva; 2018. licence: CC BY-  
54  
55 NC-SA 3.0 IGO.  
56  
57 2. Kirkcaldy RD, Weston E, Segurado AC, Hughes G. Epidemiology of gonorrhoea: a  
58  
59  
60

- 1  
2  
3 global perspective. *Sex Health*. 2019;16(5):401. doi:10.1071/sh19061  
4  
5  
6 3. Kirby Institute. Annual surveillance report 2018 HIV, viral hepatitis and sexually  
7  
8 transmissible infections in Australia. 2018.  
9  
10 [https://kirby.unsw.edu.au/sites/default/files/kirby/report/KI\\_Annual-Surveillance-](https://kirby.unsw.edu.au/sites/default/files/kirby/report/KI_Annual-Surveillance-Report-2018_0.pdf)  
11  
12 [Report-2018\\_0.pdf](https://kirby.unsw.edu.au/sites/default/files/kirby/report/KI_Annual-Surveillance-Report-2018_0.pdf).  
13  
14  
15 4. Needleman R, Chow EPF, Towns JM, et al. Access to sexual health services after the  
16  
17 rapid roll out of the launch of pre-exposure prophylaxis for HIV in Melbourne,  
18  
19 Australia: A retrospective cross-sectional analysis. *Sex Health*. 2018:528-532.  
20  
21 doi:<http://dx.doi.org/10.1071/SH17182>  
22  
23  
24 5. Ryan KE, Mak A, Stooove M, et al. Protocol for an HIV Pre-exposure Prophylaxis  
25  
26 (PrEP) Population Level Intervention Study in Victoria Australia: The PrEPX Study.  
27  
28 *Front Public Heal*. 2018;6(May):1-11. doi:10.3389/fpubh.2018.00151  
29  
30  
31 6. Zhang Kudon H, Mulatu MS, Song W, et al. Trends in Condomless Sex Among MSM  
32  
33 Who Participated in CDC-Funded HIV Risk-Reduction Interventions in the United  
34  
35 States, 2012-2017. *JPHMP*. 2020.doi: 10.1097/phh.0000000000001143.  
36  
37  
38 7. Hess KL, Crepaz N, Rose C, et al. Trends in Sexual Behavior Among Men Who have  
39  
40 Sex with Men (MSM) in High-Income Countries, 1990-2013: A Systematic Review.  
41  
42 *AIDS Behav*. 2017;21(10):2811-2834. doi:10.1007/s10461-017-1799-1.  
43  
44  
45 8. Oldenburg CE, Nunn AS, Montgomery M, et al. Behavioral Changes Following  
46  
47 Uptake of HIV Pre-exposure Prophylaxis Among Men Who Have Sex with Men in a  
48  
49 Clinical Setting. *AIDS Behav*. 2018; 22(4):1075-1079. doi:10.1007/s10461-017-1701-1  
50  
51  
52 9. Chow EPF, Grulich AE, Fairley CK. Epidemiology and prevention of sexually  
53  
54 transmitted infections in men who have sex with men at risk of HIV. *Lancet HIV*.  
55  
56 2019;6(6):e396-e405. doi:10.1016/S2352-3018(19)30043-8  
57  
58  
59 10. Jeffries WL 4th. Beyond the bisexual bridge: sexual health among U.S. men who have  
60

- 1  
2  
3 sex with men and women. *Am J Prev Med.* 2014;47(3):320-329.  
4  
5 doi:10.1016/j.amepre.2014.05.002  
6  
7  
8 11. Friedman MR, Stall R, Silvestre AJ, et al. Stuck in the middle: longitudinal HIV-  
9  
10 related health disparities among men who have sex with men and women. *J Acquir*  
11  
12 *Immune Defic Syndr.* 2014;66(2):213-220. doi:10.1097/QAI.000000000000143  
13  
14 12. Williamson DA, Chow EPF, Gorrie CL, et al. Bridging of *Neisseria gonorrhoeae*  
15  
16 lineages across sexual networks in the HIV pre-exposure prophylaxis era. *Nat*  
17  
18 *Commun.* 2019;10(1):1-10. doi:10.1038/s41467-019-12053-4  
19  
20 13. Cornelisse VJ, Chow EPF, Huffam S, et al. Increased detection of pharyngeal and  
21  
22 rectal gonorrhea in men who have sex with men after transition from culture to nucleic  
23  
24 acid amplification testing. *Sex Transm Dis.* 2017; 44(2):114-117.  
25  
26 doi:10.1097/OLQ.0000000000000553  
27  
28  
29 14. Templeton D, Read P, Varma R, Bourne C. Australian sexually transmitted infection  
30  
31 & HIV testing guidelines 2014 for asymptomatic men who have sex with men.  
32  
33 2014;(May 2013):217-229. [http://stipu.nsw.gov.au/wp-](http://stipu.nsw.gov.au/wp-content/uploads/STIGMA_Testing_Guidelines_Final_v5.pdf)  
34  
35 [content/uploads/STIGMA\\_Testing\\_Guidelines\\_Final\\_v5.pdf](http://stipu.nsw.gov.au/wp-content/uploads/STIGMA_Testing_Guidelines_Final_v5.pdf).  
36  
37  
38 15. Ong JJ, Fethers K, Fairley CK, et al. Asymptomatic and symptomatic urethral  
39  
40 gonorrhoea in men who have sex with men attending a sexual health service. *Clin*  
41  
42 *Microbiol Infect.* 2017;23(8):555-559. doi:10.1016/j.cmi.2017.02.020  
43  
44  
45 16. Chow EPF, Tomnay J, Fehler G, et al. Substantial increases in chlamydia and  
46  
47 gonorrhea positivity unexplained by changes in individual-level sexual behaviors  
48  
49 among men who have sex with men in an Australian sexual health service from 2007 to  
50  
51 2013. *Sex Transm Dis.* 2015;42(2):81-87. doi:10.1097/OLQ.0000000000000232  
52  
53  
54 17. Friedman MR, Wei C, Klem M Lou, Silvestre AJ, Markovic N, Stall R. HIV infection  
55  
56 and sexual risk among men who have sex with men and women (MSMW): A  
57  
58  
59  
60

- 1  
2  
3 systematic review and meta-analysis. *PLoS One*. 2014;9(1).  
4  
5 doi:10.1371/journal.pone.0087139  
6  
7  
8 18. Chou R, Evans C, Hoverman A, et al. Preexposure prophylaxis for the prevention of  
9  
10 HIV infection: Evidence report and systematic review for the US preventive services  
11  
12 task force. *JAMA - J Am Med Assoc*. 2019;321(22):2214-2230.  
13  
14 doi:10.1001/jama.2019.2591  
15  
16  
17 19. Woolf, S.E., Maisto, S.A. Alcohol Use and Risk of HIV infection among Men Who  
18  
19 Have Sex with Men. *AIDS Behav*. 2009; 13:757–782. doi:10.1007/s10461-007-9354-0  
20  
21  
22 20. Hutchinson AB, Farnham PG, Sansom SL, Yaylali E, Mermin JH. Cost-effectiveness  
23  
24 of frequent HIV testing of high-risk populations in the United States. *J Acquir Immune*  
25  
26 *Defic Syndr*. 2016;71(3):323-330. doi:10.1097/QAI.0000000000000838  
27  
28  
29 21. Ramakrishnan L, Ramanathan S, Chakrapani V, et al. Comparison of Sexual Risk,  
30  
31 HIV/STI Prevalence and Intervention Exposure Among Men Who Have Sex with Men  
32  
33 and Women (MSMW) and Men Who Have Sex with Men Only (MSMO) in India:  
34  
35 Implications for HIV Prevention. *AIDS Behav*. 2015;19(12):2255-2269.  
36  
37 doi:10.1007/s10461-015-1058-2  
38  
39  
40 22. Dyer T V., Khan MR, Sandoval M, et al. Drug Use and Sexual HIV Transmission Risk  
41  
42 Among Men Who have Sex with Men and Women (MSMW), Men Who have Sex  
43  
44 with Men only (MSMO), and Men Who have Sex with Women Only (MSWO) and the  
45  
46 Female Partners of MSMW and MSWO: A Network Perspective. *AIDS Behav*.  
47  
48 2017;21(12):3590-3598. doi:10.1007/s10461-017-1736-3  
49  
50  
51 23. Davis A, Best J, Luo J, et al. Differences in risk behaviours, HIV/STI testing and  
52  
53 HIV/STI prevalence between men who have sex with men and men who have sex with  
54  
55 both men and women in China. *Int J STD AIDS*. 2016;27(10):840-849.  
56  
57 doi:10.1177/0956462415596302  
58  
59  
60

- 1  
2  
3 24. Jeffries IV WL. HIV testing among bisexual men in the United States. *AIDS Educ*  
4  
5 *Prev.* 2010;22(4):356-370. doi:10.1521/aeap.2010.22.4.356  
6  
7
- 8 25. Mirandola M, Gios L, Sherriff N, et al. Socio-demographic Characteristics, Sexual and  
9  
10 Test-Seeking Behaviours Amongst Men Who have Sex with Both Men and Women:  
11  
12 Results from a Bio-behavioural Survey in 13 European Cities. *AIDS Behav.*  
13  
14 2017;21(10):3013-3025. doi:10.1007/s10461-017-1831-5  
15  
16
- 17 26. Smardon T, Vaisey A, Chow EPF, Fairley CK, Hocking JS. Sexual practices and  
18  
19 healthcare use of men who have sex with men only and men who have sex with men  
20  
21 and women – a Qualitative comparison. *2019 Australas Sex Heal Conf Jt with 2019*  
22  
23 *Australas HIV&AIDS Conf.* 2019;Sept 17-19(Perth, WA).  
24  
25
- 26 27. Williamson DA, Fairley CK, Howden BP, et al. Trends and Risk Factors for  
27  
28 Antimicrobial-Resistant *Neisseria gonorrhoeae*, Melbourne, Australia, 2007 to 2018.  
29  
30 *Antimicrob Agents Chemother.* 2019; 63(10): e01221-19. doi:10.1128/AAC.01221-19  
31  
32
- 33 28. Kwong JC, Chow EPF, Stevens K, et al. Whole-genome sequencing reveals  
34  
35 transmission of gonococcal antibiotic resistance among men who have sex with men:  
36  
37 An observational study. *Sex Transm Infect.* 2018;94(2):151-157. doi:10.1136/sextrans-  
38  
39 2017-053287  
40  
41
- 42 29. Barbee LA, Khosropour CM, Dombrowski JC, Manhart LE, Golden MR. An estimate  
43  
44 of the proportion of symptomatic gonococcal, chlamydial and non-gonococcal  
45  
46 nonchlamydial urethritis attributable to oral sex among men who have sex with men: A  
47  
48 case-control study. *Sex Transm Infect.* 2016;92(2):155-160. doi:10.1136/sextrans-  
49  
50 2015-052214  
51  
52
- 53 30. Nash JL, Hocking JS, Read TRH, et al. Contribution of sexual practices (other than  
54  
55 anal sex) to bacterial sexually transmitted infection transmission in men who have sex  
56  
57 with men: A cross-sectional analysis using electronic health records. *Sex Transm*  
58  
59  
60

- 1  
2  
3 *Infect.* 2014;90(1):55-57. doi:10.1136/sextrans-2013-051103  
4  
5  
6 31. Chow EPF, Wilson DP, Zhang L. Estimating HIV incidence among female partners of  
7  
8 bisexual men in China. *Int J Infect Dis.* 2012;16(5). doi:10.1016/j.ijid.2012.01.012  
9  
10  
11 32. Ong JJ, Landika A, Fairley CK, et al. Characteristics, sexual practices and sexually  
12  
13 transmissible infections diagnoses of men who have sex with men and use non-  
14  
15 occupational HIV post-exposure prophylaxis in Victoria, Australia. *Sex Health.* 2016;  
16  
17 13(6):555-559. doi:10.1071/SH16092  
18  
19 33. Gonzales G, Henning C, Gonzales G. Health Disparities by Sexual Orientation :  
20  
21 Results and Implications from the Behavioral Risk Factor Surveillance System. *J*  
22  
23 *Community Health.* 2017; 42(6):1163-1172. doi:10.1007/s10900-017-0366-z  
24  
25  
26 34. Feinstein BA, Health GM, Dyar C. Bisexuality, minority stress, and health. *Curr Sex*  
27  
28 *Heal Rep.* 2018;9(1):42-49. doi:10.1007/s11930-017-0096-3.Bisexuality  
29  
30  
31 35. Marti-pastor M, Ferrer M, Alonso J. Association of Enacted Stigma with Depressive  
32  
33 Symptoms Among Gay and Bisexual Men Who Have Sex with Men : 2020;7(1).  
34  
35 doi:10.1089/lgbt.2018.0230  
36  
37  
38 36. Chow EP, Fairley CK. The role of saliva in gonorrhoea and chlamydia transmission to  
39  
40 extragenital sites among men who have sex with men: new insights into transmission.  
41  
42 2019;22:40-45. doi:10.1002/jia2.25354/full  
43  
44  
45 37. Maxwell S, Shahmanesh M, Gafos M. Chemsex behaviours among men who have sex  
46  
47 with men: A systematic review of the literature. *Int J Drug Policy.* 2019;63:74-89.  
48  
49 doi:10.1016/j.drugpo.2018.11.014  
50  
51  
52 38. Van Den Boom W, Davidovich U, Heuker J, et al. Is Group Sex a Higher-Risk Setting  
53  
54 for HIV and Other Sexually Transmitted Infections Compared with Dyadic Sex among  
55  
56 Men Who Have Sex with Men? *Sex Transm Dis.* 2016;43(2):99-104.  
57  
58 doi:10.1097/OLQ.0000000000000389  
59  
60

**FIGURES**

**Figure 1** Proportion of condomless anal and/or vaginal sex in the past 12 months with casual partners between 2011 and 2018, stratified by men who have sex with men only (MSMO) and men who have sex with men and women (MSMW).

Note. MSM reporting condomless anal and/or vaginal sex includes MSM who sometimes, usually or never used a condom with their sexual partners in the past 12 months. MSMO: men who have sex with men only; MSMW: men who have sex with men and women.

**Figure 2** Positivity for syphilis and HIV between 2011 and 2018, stratified by men who have sex with men only (MSMO) and men who have sex with men and women (MSMW).

Note. MSMO: men who have sex with men only; MSMW: men who have sex with men and women.



**TABLES**

For peer review only

1  
2  
3  
4  
5  
6  
7  
8  
9  
10  
11  
12  
13  
14  
15  
16  
17  
18  
19  
20  
21  
22  
23  
24  
25  
26  
27  
28  
29  
30  
31  
32  
33  
34  
35  
36  
37  
38  
39  
40  
41  
42  
43  
44  
45  
46  
47  
48  
49  
50  
51  
52  
53  
54  
55  
56  
57  
58  
59  
60

**Table 1** Number of men who have sex with men attending the Melbourne Sexual Health Centre between 2011 and 2018, stratified by men who have sex with men only (MSMO) and men who have sex with men and women (MSMW).

|                | 2011        | 2012        | 2013        | 2014        | 2015        | 2016        | 2017        | 2018        | Total        |
|----------------|-------------|-------------|-------------|-------------|-------------|-------------|-------------|-------------|--------------|
| MSMO           | 1047 (86.2) | 1282 (87.7) | 1422 (85.5) | 1433 (85.9) | 1658 (86.5) | 1872 (86.7) | 1938 (87.1) | 2143 (86.8) | 12795 (86.6) |
| MSMW           | 168 (13.8)  | 180 (12.3)  | 241 (14.5)  | 235 (14.1)  | 258 (13.5)  | 286 (13.3)  | 286 (12.9)  | 325 (13.2)  | 1979 (13.4)  |
| <i>MSMW-W</i>  | 70 (41.7)   | 70 (38.9)   | 98 (40.7)   | 108 (46.0)  | 91 (35.3)   | 114 (39.9)  | 116 (40.6)  | 137 (42.2)  | 804 (40.6)   |
| <i>MSMW-M</i>  | 64 (38.1)   | 78 (43.3)   | 96 (39.8)   | 90 (38.3)   | 127 (49.2)  | 117 (40.9)  | 124 (43.4)  | 143 (44.0)  | 839 (42.4)   |
| <i>MSMW(=)</i> | 34 (20.2)   | 32 (17.8)   | 47 (19.5)   | 37 (15.7)   | 40 (15.5)   | 55 (19.2)   | 46 (16.1)   | 45 (13.8)   | 336 (17.0)   |
| Total          | 1215        | 1462        | 1663        | 1668        | 1916        | 2158        | 2224        | 2468        | 14774        |

Note. MSMO: men who have sex with men only; MSMW: men who have sex with men and women; MSMW-M: men who have sex with men and women and had more male than female sexual partners in the past 12 months; MSMW-W: men who have sex with men and women and had more female than male sexual partners in the past 12 month; MSMW(=): men who have sex with men and women but reported an equal number of male and female partners in the past 12 months. Data are presented as n (%) where n is the number of men in each category. The proportion of MSMO and MSMW was calculated using the total number of men each year as the denominator. The proportion of MSMW-W, MSMW-M and MSMW(=) was calculated using the total number of MSMW each year as the denominator.

**Table 2** Demographic characteristics and sexual practices among men who have sex with men attending a sexual health centre in Melbourne, 2011-2018, stratified by men who have sex with men only (MSMO) and men who have sex with men and women (MSMW).

|                                                                               | <b>Men who have sex with men only (N=12,795)</b> | <b>Men who have sex with men and women (N=1,979)</b> | <b>P value</b> |
|-------------------------------------------------------------------------------|--------------------------------------------------|------------------------------------------------------|----------------|
|                                                                               | n (%)                                            | n (%)                                                |                |
| Age (years), median (IQR)                                                     | 27 (23-33)                                       | 29 (24-38)                                           | <0.001         |
| Country of birth                                                              |                                                  |                                                      | <0.001         |
| <i>Australia</i>                                                              | 6,208 (48.5)                                     | 1,094 (55.3)                                         |                |
| <i>Overseas</i>                                                               | 6,110 (47.8)                                     | 790 (39.9)                                           |                |
| <i>No information</i>                                                         | 477 (3.7)                                        | 95 (4.8)                                             |                |
| Aboriginal and Torres Strait Islander Status                                  |                                                  |                                                      | 0.224          |
| <i>Indigenous origin</i>                                                      | 150 (1.2)                                        | 17 (0.9)                                             |                |
| <i>Non-Indigenous origin</i>                                                  | 11,595 (90.6)                                    | 1,783 (90.1)                                         |                |
| <i>No information</i>                                                         | 1,050 (8.2)                                      | 179 (9.0)                                            |                |
| Sex overseas in the past 12 months                                            |                                                  |                                                      | 0.060          |
| <i>Yes</i>                                                                    | 4,415 (34.5)                                     | 735 (37.1)                                           |                |
| <i>No</i>                                                                     | 7,571 (59.2)                                     | 1131 (57.2)                                          |                |
| <i>No information</i>                                                         | 809 (6.3)                                        | 113 (5.7)                                            |                |
| Sex work during lifetime                                                      |                                                  |                                                      | 0.574          |
| <i>Yes</i>                                                                    | 71 (0.6)                                         | 13 (0.7)                                             |                |
| <i>No</i>                                                                     | 12,724 (99.4)                                    | 1,966 (99.3)                                         |                |
| Injected drug use in the past 12 months                                       |                                                  |                                                      | 0.032          |
| <i>Yes</i>                                                                    | 211 (1.6)                                        | 40 (2.0)                                             |                |
| <i>No</i>                                                                     | 12,363 (96.6)                                    | 1,890 (95.5)                                         |                |
| <i>No information</i>                                                         | 221 (1.7)                                        | 49 (2.5)                                             |                |
| Number of female and male sexual partners in the past 12 months, median (IQR) | 5 (3-10)                                         | 6 (4-11)                                             | <0.001         |
| Number of male sexual partners in the past 12 months, median (IQR)            | 5 (3-10)                                         | 2 (1-5)                                              | <0.001         |
| Number of female sexual partners in the past 12 months, median (IQR)          | NA                                               | 2 (1-5)                                              | -              |
| Regular sexual partner                                                        |                                                  |                                                      | -              |
| <i>No regular partner</i>                                                     | 7,513 (58.7)                                     | 1,053 (53.2)                                         |                |
| <i>Regular male partner</i>                                                   | 5,132 (40.1)                                     | 169 (8.5)                                            |                |
| <i>Regular female partner</i>                                                 | NA                                               | 663 (33.5)                                           |                |
| <i>Regular female and male partner</i>                                        | NA                                               | 91 (4.6)                                             |                |
| <i>No information</i>                                                         | 150 (1.2)                                        | 3 (0.2)                                              |                |

|                                                                                                  |               |              |        |
|--------------------------------------------------------------------------------------------------|---------------|--------------|--------|
| Anal sexual practice with regular male partners <sup>a</sup>                                     |               |              | 0.118  |
| <i>Receptive only</i>                                                                            | 435 (8.5)     | 15 (5.8)     |        |
| <i>Insertive only</i>                                                                            | 465 (9.1)     | 16 (6.2)     |        |
| <i>Receptive and insertive</i>                                                                   | 3,921 (76.4)  | 214 (82.3)   |        |
| <i>No anal sex</i>                                                                               | 234 (4.6)     | 9 (3.5)      |        |
| <i>No information</i>                                                                            | 77 (1.5)      | 6 (2.3)      |        |
| Condom use with regular male partners in the past 12 months for receptive anal sex <sup>b*</sup> |               |              | 0.005  |
| <i>Always</i>                                                                                    | 1,241 (28.5)  | 85 (37.1)    |        |
| <i>Not always</i>                                                                                | 3,115 (71.5)  | 144 (62.9)   |        |
| Condom use with regular male partners in the past 12 months for insertive anal sex <sup>c*</sup> |               |              | 0.010  |
| <i>Always</i>                                                                                    | 1,254 (28.6)  | 84 (36.5)    |        |
| <i>Not always</i>                                                                                | 3,132 (71.4)  | 146 (63.5)   |        |
| Vaginal or anal sex with regular female partner <sup>d</sup>                                     |               |              | -      |
| <i>Yes</i>                                                                                       | NA            | 729 (96.7)   |        |
| <i>No</i>                                                                                        | NA            | 10 (1.3)     |        |
| <i>No information</i>                                                                            | NA            | 15 (2.0)     |        |
| Condom use with regular female partners in the past 12 months <sup>e*</sup>                      |               |              | -      |
| <i>Always</i>                                                                                    | NA            | 132 (18.1)   |        |
| <i>Not always</i>                                                                                | NA            | 597 (81.9)   |        |
| Casual sexual partner                                                                            |               |              | -      |
| <i>No casual partner</i>                                                                         | 806 (6.3)     | 11 (0.6)     |        |
| <i>Casual male partner(s)</i>                                                                    | 11,969 (93.5) | 194 (9.8)    |        |
| <i>Casual female partner(s)</i>                                                                  | NA            | 30 (1.5)     |        |
| <i>Casual female and male partner(s)</i>                                                         | NA            | 1,744 (88.1) |        |
| <i>No information</i>                                                                            | 20 (0.2)      | 0 (0)        |        |
| Anal sexual practice with casual male partners                                                   |               |              | <0.001 |
| <i>Receptive only</i>                                                                            | 1,262 (9.9)   | 131 (6.6)    |        |
| <i>Insertive only</i>                                                                            | 1,344 (10.5)  | 282 (14.2)   |        |
| <i>Receptive and insertive</i>                                                                   | 7,835 (61.2)  | 1,060 (53.6) |        |
| <i>No anal sex</i>                                                                               | 1,692 (13.2)  | 422 (21.3)   |        |
| <i>No information</i>                                                                            | 662 (5.2)     | 84 (4.2)     |        |
| Condom use with casual male partners in the past 12 months for receptive anal sex <sup>f*</sup>  |               |              |        |
| <i>Always</i>                                                                                    | 4,207 (46.2)  | 597 (50.1)   | 0.012  |
| <i>Not always</i>                                                                                | 4,890 (53.8)  | 594 (49.9)   |        |
| Condom use with casual male partners in the past 12 months for insertive anal sex <sup>g*</sup>  |               |              |        |
| <i>Always</i>                                                                                    | 4,276 (46.6)  | 649 (48.4)   | 0.223  |

|                                                                            |              |              |   |
|----------------------------------------------------------------------------|--------------|--------------|---|
| <i>Not always</i>                                                          | 4,903 (53.4) | 693 (51.6)   |   |
| Vaginal or anal sex with casual female partner                             |              |              | - |
| <i>Yes</i>                                                                 | NA           | 1,686 (85.2) |   |
| <i>No</i>                                                                  | NA           | 56 (2.8)     |   |
| <i>No information</i>                                                      | NA           | 237 (12.0)   |   |
| Condom use with casual female partners in the past 12 months <sup>h*</sup> |              |              | - |
| <i>Always</i>                                                              | NA           | 548 (32.5)   |   |
| <i>Not always</i>                                                          | NA           | 1,138 (67.5) |   |

Note. NA: Not applicable; IQR: Interquartile range; MSM: men who have sex with men.

<sup>a</sup>Only including MSM with regular male partners or regular male and female partners, <sup>b</sup>Only including MSM that referred receptive only or receptive and insertive anal sex with regular male partners, <sup>c</sup>Only including MSM that referred insertive only or receptive and insertive anal sex with regular male partners, <sup>d</sup>Only including MSM with regular female partners or regular male and female partners <sup>e</sup>Only including MSM that referred vaginal and/or anal sex with regular female partner, <sup>f</sup>Only including MSM that referred receptive only or receptive and insertive anal sex with casual male partners, <sup>g</sup>Only including MSM that referred insertive only or receptive and insertive anal sex with casual male partners, <sup>h</sup>Only including MSM that referred vaginal or anal sex with casual female partners. \*'Not always' was defined as men who sometimes, usually or never used a condom with their sexual partners in the past 12 months (with female partners for vaginal and/or anal sex, with male partners for anal sex).

**Table 3** Positivity for gonorrhoea, chlamydia, syphilis and HIV among men who have sex with men attending a sexual health centre in Melbourne, 2011-2018, stratified by men who have sex with men only (MSMO) and men who have sex with men and women (MSMW).

| HIV/STI                                 | Men who have sex with men only (N=12,795) |                           |                        | Men who have sex with men and women (N=1,979) |                           |                        | P value |
|-----------------------------------------|-------------------------------------------|---------------------------|------------------------|-----------------------------------------------|---------------------------|------------------------|---------|
|                                         | No. of men tested, <i>N</i>               | No. of positive, <i>n</i> | Positivity, % (95% CI) | No. of men tested, <i>N</i>                   | No. of positive, <i>n</i> | Positivity, % (95% CI) |         |
| Gonorrhoea                              |                                           |                           |                        |                                               |                           |                        |         |
| <i>Oropharyngeal</i>                    | 11,810                                    | 682                       | 5.8 (5.4 to 6.2)       | 1,711                                         | 68                        | 4.0 (3.1 to 5.0)       | 0.002   |
| <i>Urethral*</i>                        | 11,699                                    | 390                       | 3.3 (3.0 to 3.7)       | 1,885                                         | 52                        | 2.8 (2.1 to 3.6)       | 0.192   |
| <i>Anorectal</i>                        | 11,080                                    | 745                       | 6.7 (6.3 to 7.2)       | 1,404                                         | 58                        | 4.1 (3.2 to 5.3)       | <0.001  |
| <i>Any anatomical site</i> <sup>†</sup> | 11,951                                    | 1,321                     | 11.1 (10.5 to 11.6)    | 1,829                                         | 140                       | 7.7 (6.5 to 9.0)       | <0.001  |
| Chlamydia                               |                                           |                           |                        |                                               |                           |                        |         |
| <i>Urethral</i>                         | 11,699                                    | 410                       | 3.5 (3.2 to 3.9)       | 1,885                                         | 73                        | 3.9 (3.0 to 4.8)       | 0.423   |
| <i>Anorectal</i>                        | 11,043                                    | 989                       | 9.0 (8.4 to 9.5)       | 1,404                                         | 83                        | 5.9 (4.7 to 7.3)       | <0.001  |
| <i>Any anatomical site</i> <sup>†</sup> | 11,891                                    | 1,272                     | 10.7 (10.1 to 11.3)    | 1,907                                         | 141                       | 7.4 (6.3 to 8.7)       | <0.001  |
| Syphilis                                | 11,317                                    | 797                       | 7.0 (6.6 to 7.5)       | 1,773                                         | 81                        | 4.6 (3.6 to 5.6)       | <0.001  |
| HIV                                     |                                           |                           |                        |                                               |                           |                        |         |
| <i>New diagnosis</i> <sup>‡</sup>       | 11,102                                    | 262                       | 2.4 (2.1 to 2.7)       | 1,774                                         | 10                        | 0.6 (0.3 to 1.0)       | <0.001  |
| <i>Previous diagnosis</i>               | 12,795                                    | 316                       | 2.5 (2.2 to 2.8)       | 1,979                                         | 7                         | 0.4 (0.1 to 0.7)       | <0.001  |

Note.\*Before 2015, urethral gonorrhoea testing was only performed among symptomatic MSM with urethral symptoms or self-reported as contact of infection. The number of people tested corresponds to the number of people tested for urethral chlamydia; † Any anatomical site for gonorrhoea includes urethral, anorectal and oropharyngeal; while any site for chlamydia includes urethral and anorectal; ‡ Only including HIV cases diagnosed on the day of the first visit.

**Table 4** Association between sexual practice and gonorrhoea, chlamydia, syphilis and HIV positivity among men who have sex with men only (MSMO) and men who have sex with men and women (MSMW) attending a sexual health centre in Melbourne, 2011-2018.

| HIV/STI                                       | OR (95% CI)          | P value | aOR (95% CI)*        | P value |
|-----------------------------------------------|----------------------|---------|----------------------|---------|
| Gonorrhoea (any anatomical site) <sup>†</sup> |                      |         |                      |         |
| <i>MSMO</i>                                   | 1.50 (1.25 to 1.80)  | <0.001  | 1.36 (1.13 to 1.64)  | 0.001   |
| <i>MSMW</i>                                   | 1                    |         | 1                    | ref     |
| Chlamydia (any anatomical site) <sup>†</sup>  |                      |         |                      |         |
| <i>MSMO</i>                                   | 1.50 (1.25 to 1.80)  | <0.001  | 1.39 (1.16 to 1.67)  | <0.001  |
| <i>MSMW</i>                                   | 1                    |         | 1                    | ref     |
| Syphilis                                      |                      |         |                      |         |
| <i>MSMO</i>                                   | 1.58 (1.25 to 2.00)  | <0.001  | 1.74 (1.37 to 2.22)  | <0.001  |
| <i>MSMW</i>                                   | 1                    |         | 1                    | ref     |
| HIV (new diagnosis) <sup>‡</sup>              |                      |         |                      |         |
| <i>MSMO</i>                                   | 4.26 (2.26 to 8.03)  | <0.001  | 4.60 (2.43 to 8.70)  | <0.001  |
| <i>MSMW</i>                                   | 1                    |         | 1                    | ref     |
| HIV (previous diagnosis)                      |                      |         |                      |         |
| <i>MSMO</i>                                   | 7.13 (3.37 to 15.11) | <0.001  | 9.08 (4.26 to 19.37) | <0.001  |
| <i>MSMW</i>                                   | 1                    | ref     | 1                    | ref     |

Note. OR: crude odds ratio; aOR: adjusted odds ratio; CI: confidence intervals; MSMO: men who have sex with men only; MSMW: men who have sex with men and women. \*Adjusted by age, country of birth, sex overseas, injected drug use in the past 12 months, regular partner, number of male sexual partners in the past 12 months, condom use with casual male partners in the past 12 months and year of visit; <sup>†</sup>Any anatomical site for gonorrhoea includes urethral, anorectal and oropharyngeal; while any site for chlamydia includes urethral and anorectal; <sup>‡</sup>Only including HIV cases diagnosed on the day of the first visit.

**Table 5** Association between sexual practice and gonorrhoea, chlamydia, syphilis and HIV positivity among men who have sex with men only (MSMO) and men who have sex with men and women (MSMW) attending a sexual health centre in Melbourne , 2011-2018.

| HIV/STI                                       | OR (95% CI)            | P value | aOR (95% CI)*          | P value |
|-----------------------------------------------|------------------------|---------|------------------------|---------|
| Gonorrhoea (any anatomical site) <sup>†</sup> |                        |         |                        |         |
| <i>MSMO</i>                                   | 1.96 (1.45 to 2.67)    | <0.001  | 1.58 (1.15 to 2.18)    | 0.005   |
| <i>MSMW-M</i>                                 | 1.91 (1.31 to 2.78)    | 0.001   | 1.41 (0.94 to 2.12)    | 0.093   |
| <i>MSMW-W</i>                                 | 1                      | ref     | 1                      | ref     |
| Chlamydia (any anatomical site) <sup>†</sup>  |                        |         |                        |         |
| <i>MSMO</i>                                   | 1.87 (1.39 to 2.50)    | <0.001  | 1.47 (1.09 to 1.99)    | 0.013   |
| <i>MSMW-M</i>                                 | 1.63 (1.12 to 2.38)    | 0.010   | 1.19 (0.80 to 1.77)    | 0.394   |
| <i>MSMW-W</i>                                 | 1                      | ref     | 1                      | ref     |
| Syphilis                                      |                        |         |                        |         |
| <i>MSMO</i>                                   | 2.18 (1.45 to 3.27)    | <0.001  | 2.11 (1.36 to 3.27)    | 0.001   |
| <i>MSMW-M</i>                                 | 1.48 (0.88 to 2.49)    | 0.142   | 1.08 (0.61 to 1.93)    | 0.791   |
| <i>MSMW-W</i>                                 | 1                      | ref     | 1                      | ref     |
| HIV (new diagnosis) <sup>‡</sup>              |                        |         |                        |         |
| <i>MSMO</i>                                   | 6.01 (1.92 to 18.80)   | 0.002   | 5.49 (1.74 to 17.30)   | 0.004   |
| <i>MSMW-M</i>                                 | 2.38 (0.61 to 9.24)    | 0.210   | 1.81 (0.43 to 7.63)    | 0.422   |
| <i>MSMW-W</i>                                 | 1                      | ref     | 1                      | ref     |
| HIV (previous diagnosis)                      |                        |         |                        |         |
| <i>MSMO</i>                                   | 21.22 (2.98 to 151.30) | 0.002   | 17.91 (2.50 to 128.43) | 0.004   |
| <i>MSMW-M</i>                                 | 6.30 (0.76 to 52.45)   | 0.089   | 4.10 (0.47 to 35.42)   | 0.200   |
| <i>MSMW-W</i>                                 | 1                      | ref     | 1                      | ref     |

Note. OR: crude odds ratio; aOR: adjusted odds ratio; CI: confidence intervals; MSMO: men who have sex with men only; MSMW-M: men who have sex with men and women and had more male than female sexual partner in the past 12 months; MSMW-W: men who have sex with men and women and had more female than male sexual partner in the past 12 months; MSMW-M: men who have sex with men and women and had more male than female sexual partner in the past 12 months. \*Adjusted by age, country of birth, sex overseas, injected drug use in the past 12 months, regular partner, number of male sexual partners in the past 12 months, condom use with casual male partners in the past 12 months and year of visit; †Any anatomical site for gonorrhoea includes urethral, anorectal and oropharyngeal, while any site for chlamydia includes urethral and anorectal; ‡Only including HIV cases diagnosed on the day of the first visit.



1  
2  
3  
4  
5  
6  
7  
8  
9  
10  
11  
12  
13  
14  
15  
16  
17  
18  
19  
20Proportion of men reported  
condomless sex with casual partner(s) (%)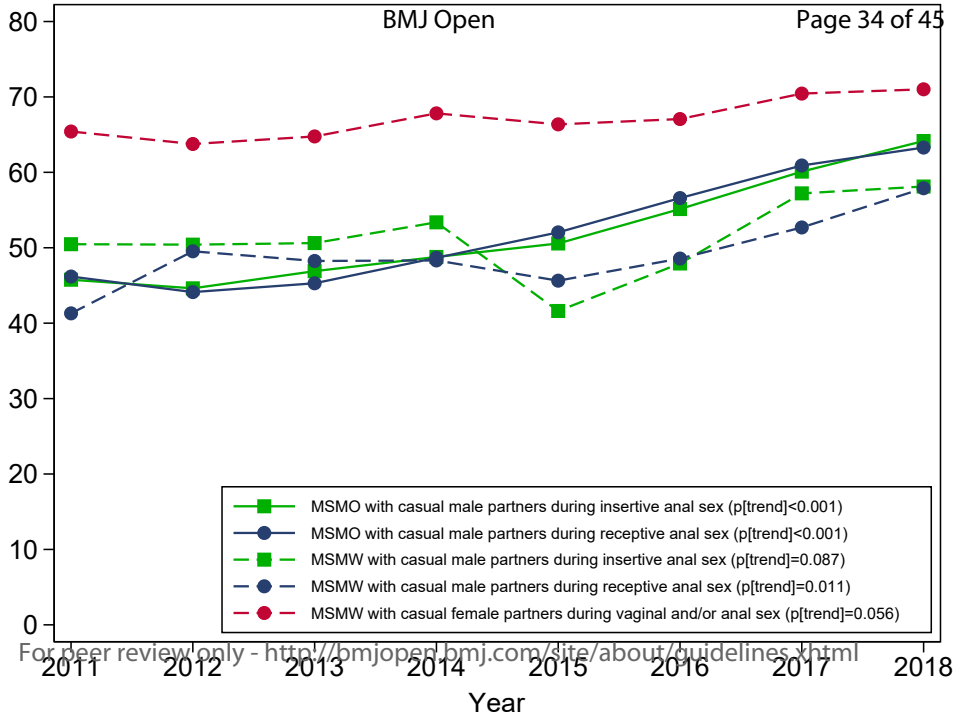

1  
2  
3  
4  
5  
6  
7  
8  
9  
10  
11  
12  
13  
14  
15  
16  
17  
18  
19  
20

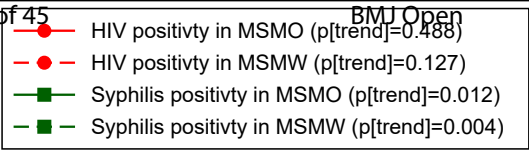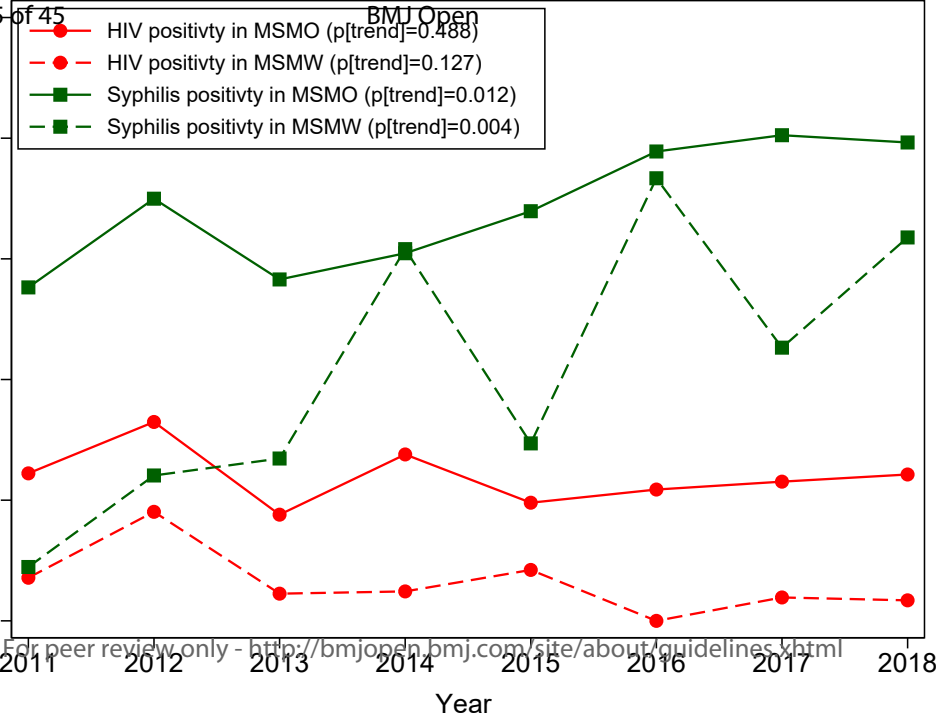

**SUPPLEMENTARY MATERIAL**

**Trends and differences in sexual practices and sexually transmitted infections in men who have sex with men only (MSMO) and men who have sex with men and women (MSMW): a repeated cross-sectional study in Melbourne, Australia.**

*Mario Martín-Sánchez, Richard Case, Christopher K. Fairley, Jane S. Hocking, Catriona S. Bradshaw, Jason J. Ong, Marcus Y. Chen, Eric P.F. Chow*

|                                                                                                                                                                                                            |   |
|------------------------------------------------------------------------------------------------------------------------------------------------------------------------------------------------------------|---|
| Table S1 Demographic characteristics and sexual practices among men who have sex with men only and men who have sex with men and women attending a sexual health centre in Melbourne, 2011-2018.....       | 2 |
| Table S2 Temporal trend of the sexual practices among men who have sex with men only attending a sexual health centre in Melbourne, 2011-2018.....                                                         | 4 |
| Table S3 Temporal trend of the sexual practices among men who have sex with men and women attending a sexual health centre in Melbourne, 2011-2018.....                                                    | 5 |
| Table S4 Temporal trend of the positivity for sexually transmitted infections and HIV among men who have sex with men only attending a sexual health centre in Melbourne, 2011-2018.....                   | 7 |
| Table S5 Temporal trend of the positivity for sexually transmitted infections and HIV among men who have sex with men and women attending a sexual health centre in Melbourne, 2011-2018.....              | 8 |
| Table S6 Positivity for gonorrhoea, chlamydia, syphilis and HIV among men who have sex with men only and men who have sex with men and women attending a sexual health centre in Melbourne, 2011-2018..... | 9 |

**Table S1** Demographic characteristics and sexual practices among men who have sex with men only and men who have sex with men and women attending a sexual health centre in Melbourne, 2011-2018.

|                                                                                                                | MSMO<br>(N=12,795) | MSMW-<br>M<br>(N=804) | MSMW-<br>W<br>(N=839) | Comparison<br>across three<br>groups | Comparison<br>between<br>MSMW-M<br>and MSM-W |
|----------------------------------------------------------------------------------------------------------------|--------------------|-----------------------|-----------------------|--------------------------------------|----------------------------------------------|
|                                                                                                                | n (%)              | n (%)                 | n (%)                 | P value                              | P value                                      |
| <b>Age (years), median(IQR)</b>                                                                                | 27 (23-33)         | 29 (24-39)            | 28 (24-36)            | <0.001                               | 0.845                                        |
| <b>Country of birth</b>                                                                                        |                    |                       |                       | <0.001                               | 0.167                                        |
| <i>Australia</i>                                                                                               | 6,208 (48.5)       | 465 (57.8)            | 452 (53.9)            |                                      |                                              |
| <i>Overseas</i>                                                                                                | 6,110 (47.8)       | 297 (36.9)            | 348 (41.5)            |                                      |                                              |
| <i>No information</i>                                                                                          | 477 (3.7)          | 42 (5.2)              | 39 (4.5)              |                                      |                                              |
| <b>Aboriginal and Torres Strait<br/>Islander Status</b>                                                        |                    |                       |                       | 0.280                                | 0.254                                        |
| <i>Indigenous origin</i>                                                                                       | 150 (1.2)          | 10 (1.2)              | 5 (0.6)               |                                      |                                              |
| <i>Non-Indigenous origin</i>                                                                                   | 11,595 (90.6)      | 715 (88.9)            | 762 (90.8)            |                                      |                                              |
| <i>No information</i>                                                                                          | 1,050 (8.2)        | 79 (9.8)              | 72 (8.6)              |                                      |                                              |
| <b>Sex overseas in the past 12<br/>months</b>                                                                  |                    |                       |                       | <0.001                               | 0.002                                        |
| <i>Yes</i>                                                                                                     | 4,415 (34.5)       | 278 (34.6)            | 361 (43.0)            |                                      |                                              |
| <i>No</i>                                                                                                      | 7,571 (59.2)       | 470 (58.5)            | 433 (51.6)            |                                      |                                              |
| <i>No information</i>                                                                                          | 809 (6.3)          | 56 (7.0)              | 45 (5.4)              |                                      |                                              |
| <b>Sex work during lifetime</b>                                                                                |                    |                       |                       | 0.454                                | 0.722                                        |
| <i>Yes</i>                                                                                                     | 71 (0.6)           | 7 (0.9)               | 6 (0.7)               |                                      |                                              |
| <i>No</i>                                                                                                      | 12,724 (99.4)      | 797 (99.1)            | 833 (99.3)            |                                      |                                              |
| <b>Injected drug use in past 12<br/>months</b>                                                                 |                    |                       |                       | <0.001                               | 0.777                                        |
| <i>Yes</i>                                                                                                     | 211 (1.6)          | 17 (2.1)              | 21 (2.5)              |                                      |                                              |
| <i>No</i>                                                                                                      | 12,363 (96.6)      | 763 (95.7)            | 797 (97.5)            |                                      |                                              |
| <i>No information</i>                                                                                          | 221 (1.7)          | 17 (2.1)              | 21 (2.5)              |                                      |                                              |
| <b>Number of male and female<br/>sexual partners in the past 12<br/>months, median (IQR)</b>                   | 5 (3-10)           | 7 (5-12)              | 6 (4-11)              | <0.001                               | <0.001                                       |
| <b>Number of male sexual partners<br/>in the past 12 months, median<br/>(IQR)</b>                              | 5 (3-10)           | 5 (3-10)              | 1 (1-2)               | <0.001                               | <0.001                                       |
| <b>Number of female sexual<br/>partners in the past 12 months,<br/>median (IQR)</b>                            | NA                 | 1 (1-2)               | 5 (3-8)               | NA                                   | <0.001                                       |
| <b>Regular sexual partner</b>                                                                                  |                    |                       |                       | NA                                   | <0.001                                       |
| <i>No regular partner</i>                                                                                      | 7,513 (58.7)       | 433 (53.9)            | 453 (54.1)            |                                      |                                              |
| <i>Regular male partner</i>                                                                                    | 5,132 (40.1)       | 138 (17.2)            | 11 (1.3)              |                                      |                                              |
| <i>Regular female partner</i>                                                                                  | NA                 | 195 (24.3)            | 350 (41.7)            |                                      |                                              |
| <i>Regular female and male partner</i>                                                                         | NA                 | 37 (4.6)              | 23 (2.7)              |                                      |                                              |
| <i>No information</i>                                                                                          | 150 (1.2)          | 1 (0.1)               | 2 (0.2)               |                                      |                                              |
| <b>Anal sexual practice with regular<br/>male partners<sup>a</sup></b>                                         |                    |                       |                       | <0.001                               | 0.001                                        |
| <i>Receptive only</i>                                                                                          | 435 (8.5)          | 10 (5.7)              | 2 (5.7)               |                                      |                                              |
| <i>Insertive only</i>                                                                                          | 465 (9.1)          | 13 (7.4)              | 0 (0)                 |                                      |                                              |
| <i>Receptive and insertive</i>                                                                                 | 3,921 (76.4)       | 145 (82.4)            | 26 (74.3)             |                                      |                                              |
| <i>No anal sex</i>                                                                                             | 234 (4.6)          | 6 (3.4)               | 2 (5.7)               |                                      |                                              |
| <i>No information</i>                                                                                          | 79 (1.5)           | 2 (1.1)               | 5 (14.3)              |                                      |                                              |
| <b>Condom use with regular male<br/>partners in the past 12 months<br/>for receptive anal sex<sup>b*</sup></b> |                    |                       |                       | 0.150                                | 0.275                                        |
| <i>Always</i>                                                                                                  | 1,241 (28.5)       | 50 (32.3)             | 12 (42.9)             |                                      |                                              |
| <i>Not always</i>                                                                                              | 3,115 (71.5)       | 105 (67.7)            | 16 (57.1)             |                                      |                                              |
| <b>Condom use with regular male<br/>partners in the past 12 months<br/>for insertive anal sex<sup>c*</sup></b> |                    |                       |                       | 0.142                                | 0.935                                        |
| <i>Always</i>                                                                                                  | 1,254 (28.6)       | 56 (35.4)             | 9 (34.6)              |                                      |                                              |
| <i>Not always</i>                                                                                              | 3,132 (71.4)       | 102 (64.6)            | 17 (65.4)             |                                      |                                              |

|                                                                                                       |               |            |            |        |        |
|-------------------------------------------------------------------------------------------------------|---------------|------------|------------|--------|--------|
| <b>Vaginal or anal sex with regular female partner<sup>d</sup></b>                                    |               |            |            | NA     | 0.903  |
| <i>Yes</i>                                                                                            | NA            | 223 (96.1) | 361 (96.8) |        |        |
| <i>No</i>                                                                                             | NA            | 4 (1.7)    | 5 (1.3)    |        |        |
| <i>No information</i>                                                                                 | NA            | 5 (2.2)    | 7 (1.9)    |        |        |
| <b>Condom use with regular female partners in the past 12 months<sup>e*</sup></b>                     |               |            |            | NA     | 0.551  |
| <i>Always</i>                                                                                         | NA            | 42 (18.8)  | 61 (16.9)  |        |        |
| <i>Not always</i>                                                                                     | NA            | 181 (81.2) | 300 (83.1) |        |        |
| <b>Casual sexual partner</b>                                                                          |               |            |            | NA     | <0.001 |
| <i>No casual partner</i>                                                                              | 806 (6.3)     | 0          | 0          |        |        |
| <i>Casual male partner(s)</i>                                                                         | 11,969 (93.5) | 112 (13.9) | 0          |        |        |
| <i>Casual female partner(s)</i>                                                                       | NA            | 0          | 19 (2.3)   |        |        |
| <i>Casual female and male partner(s)</i>                                                              | NA            | 692 (86.1) | 820 (97.7) |        |        |
| <i>No information</i>                                                                                 | 20 (0.2)      | 0          | 0          |        |        |
| <b>Anal sexual practice with casual male partners</b>                                                 |               |            |            | <0.001 | <0.001 |
| <i>Receptive only</i>                                                                                 | 1,262 (9.9)   | 45 (5.6)   | 64 (7.6)   |        |        |
| <i>Insertive only</i>                                                                                 | 1,344 (10.5)  | 116 (14.4) | 119 (14.2) |        |        |
| <i>Receptive and insertive</i>                                                                        | 7,835 (61.2)  | 524 (65.2) | 407 (48.5) |        |        |
| <i>No anal sex</i>                                                                                    | 1,692 (13.2)  | 108 (13.4) | 210 (25.0) |        |        |
| <i>No information</i>                                                                                 | 662 (5.2)     | 11 (1.4)   | 39 (4.6)   |        |        |
| <b>Condom use with casual male partners in the past 12 months for receptive anal sex<sup>f*</sup></b> |               |            |            | 0.004  | 0.004  |
| <i>Always</i>                                                                                         | 4,207 (46.2)  | 256 (45.0) | 254 (53.9) |        |        |
| <i>Not always</i>                                                                                     | 4,890 (53.8)  | 313 (55.0) | 217 (46.1) |        |        |
| <b>Condom use with casual male partners in the past 12 months for insertive anal sex<sup>g*</sup></b> |               |            |            | 0.003  | 0.001  |
| <i>Always</i>                                                                                         | 4,276 (46.6)  | 275 (43.0) | 278 (52.9) |        |        |
| <i>Not always</i>                                                                                     | 4,903 (53.4)  | 365 (57.0) | 248 (47.1) |        |        |
| <b>Vaginal or anal sex with casual female partner</b>                                                 |               |            |            | -      | <0.001 |
| <i>Yes</i>                                                                                            | NA            | 658 (81.8) | 799 (95.2) |        |        |
| <i>No</i>                                                                                             | NA            | 19 (2.4)   | 24 (2.9)   |        |        |
| <i>No information</i>                                                                                 | NA            | 127 (15.8) | 16 (1.9)   |        |        |
| <b>Condom use with casual female partners in the past 12 months<sup>h*</sup></b>                      |               |            |            | -      | <0.001 |
| <i>Always</i>                                                                                         | NA            | 257 (39.1) | 195 (24.4) |        |        |
| <i>Not always</i>                                                                                     | NA            | 401 (60.9) | 604 (75.6) |        |        |

Note. NA: Not applicable; IQR: Interquartile range; MSM: men who have sex with men; MSMO: men who have sex with men only; MSMW-W: men who have sex with men and women and had more female than male sexual partner in the past 12 months; MSMW-M: men who have sex with men and women and had more male than female sexual partner in the past 12 months; <sup>a</sup>Only including MSM with regular male partners or regular male and female partners; <sup>b</sup>Only including MSM that referred receptive only or receptive and insertive anal sex with regular male partners; <sup>c</sup>Only including MSM that referred insertive only or receptive and insertive anal sex with regular male partners; <sup>d</sup>Only including MSM with regular female partners or regular male and female partners; <sup>e</sup>Only including MSM that referred vaginal or anal sex with regular female partner; <sup>f</sup> Only including MSM that referred receptive only or receptive and insertive anal sex with casual male partners; <sup>g</sup> Only including MSM that referred insertive only or receptive and insertive anal sex with casual male partners, <sup>h</sup> Only including MSM that referred vaginal or anal sex with casual female partners; \*'Not always' was defined as men who sometimes, usually or never used a condom with their sexual partners in the past 12 months (with female partners for vaginal and/or anal sex, with male partners for anal sex).

**Table S2** Temporal trend of the sexual practices among men who have sex with men only attending a sexual health centre in Melbourne, 2011-2018.

|                                                                                           | 2011     |      | 2012     |      | 2013     |      | 2014     |      | 2015     |      | 2016     |      | 2017     |      | 2018     |      | 2011-18            |
|-------------------------------------------------------------------------------------------|----------|------|----------|------|----------|------|----------|------|----------|------|----------|------|----------|------|----------|------|--------------------|
|                                                                                           | <i>n</i> | %    | P <sub>trend</sub> |
| <b>Number of sexual partners in the past 12 months</b>                                    |          |      |          |      |          |      |          |      |          |      |          |      |          |      |          |      | 0.002              |
| <5                                                                                        | 515      | 49.2 | 598      | 46.6 | 645      | 45.4 | 626      | 43.7 | 686      | 41.4 | 802      | 42.8 | 859      | 44.3 | 934      | 43.6 | -                  |
| ≥5                                                                                        | 532      | 50.8 | 684      | 53.4 | 777      | 54.6 | 807      | 56.3 | 972      | 58.6 | 1070     | 57.2 | 1079     | 55.7 | 1209     | 56.4 | -                  |
| <b>Condom use with regular male partners in the past 12 months*</b>                       |          |      |          |      |          |      |          |      |          |      |          |      |          |      |          |      | <0.001             |
| <i>Always</i>                                                                             | 134      | 30.8 | 164      | 31.2 | 160      | 30.0 | 142      | 26.3 | 167      | 27.6 | 201      | 28.5 | 139      | 19.4 | 165      | 21.6 | -                  |
| <i>Not always</i>                                                                         | 301      | 69.2 | 362      | 68.8 | 373      | 70.0 | 398      | 73.7 | 437      | 72.4 | 504      | 71.5 | 576      | 80.6 | 598      | 78.4 | -                  |
| <b>Anal sexual practice with casual male partners</b>                                     |          |      |          |      |          |      |          |      |          |      |          |      |          |      |          |      |                    |
| <i>Receptive only</i>                                                                     | 74       | 7.5  | 109      | 9.1  | 109      | 8.1  | 140      | 10.3 | 151      | 9.5  | 196      | 11.0 | 218      | 11.8 | 265      | 13.0 | <0.001             |
| <i>Insertive only</i>                                                                     | 98       | 10.0 | 133      | 11.0 | 153      | 11.4 | 150      | 11.1 | 178      | 11.3 | 205      | 11.5 | 194      | 10.5 | 233      | 11.4 | 0.580              |
| <i>Receptive and insertive</i>                                                            | 634      | 64.5 | 750      | 62.3 | 847      | 63.3 | 877      | 64.6 | 1050     | 66.4 | 1177     | 66.2 | 1207     | 65.2 | 1293     | 63.4 | 0.396              |
| <i>No anal sex</i>                                                                        | 177      | 18.0 | 212      | 17.6 | 229      | 17.1 | 190      | 14.0 | 203      | 12.8 | 201      | 11.3 | 233      | 12.6 | 247      | 12.1 | <0.001             |
| <b>Condom use with casual male partners in the past 12 months for receptive anal sex*</b> |          |      |          |      |          |      |          |      |          |      |          |      |          |      |          |      | <0.001             |
| <i>Always</i>                                                                             | 381      | 53.8 | 480      | 55.9 | 523      | 54.7 | 522      | 51.3 | 576      | 48.0 | 596      | 43.4 | 557      | 39.1 | 572      | 36.7 | -                  |
| <i>Not always</i>                                                                         | 327      | 46.2 | 379      | 44.1 | 433      | 45.3 | 495      | 48.7 | 625      | 52.0 | 777      | 56.6 | 868      | 60.9 | 986      | 63.3 | -                  |
| <b>Condom use with casual male partners in the past 12 months for insertive anal sex*</b> |          |      |          |      |          |      |          |      |          |      |          |      |          |      |          |      | <0.001             |
| <i>Always</i>                                                                             | 397      | 54.2 | 489      | 55.4 | 531      | 53.1 | 526      | 51.2 | 607      | 49.4 | 620      | 44.9 | 559      | 39.9 | 547      | 35.8 | -                  |
| <i>Not always</i>                                                                         | 335      | 45.8 | 394      | 44.6 | 469      | 46.9 | 501      | 48.8 | 621      | 50.6 | 762      | 55.1 | 842      | 60.1 | 979      | 64.2 | -                  |

\* 'Not always' was defined as men who sometimes, usually or never used a condom with their sexual partners in the past 12 months (with female partners for vaginal or anal sex, with male partners for anal sex).

**Table S3** Temporal trend of the sexual practices among men who have sex with men and women attending a sexual health centre in Melbourne, 2011-2018.

|                                                                                           | 2011     |      | 2012     |      | 2013     |      | 2014     |      | 2015     |      | 2016     |      | 2017     |      | 2018     |      | 2011-18            |
|-------------------------------------------------------------------------------------------|----------|------|----------|------|----------|------|----------|------|----------|------|----------|------|----------|------|----------|------|--------------------|
|                                                                                           | <i>n</i> | %    | P <sub>trend</sub> |
| <b>Number of sexual partners past 12 months</b>                                           |          |      |          |      |          |      |          |      |          |      |          |      |          |      |          |      | 0.014              |
| <5                                                                                        | 62       | 36.9 | 66       | 36.7 | 95       | 39.4 | 82       | 34.9 | 94       | 36.4 | 90       | 31.5 | 94       | 32.9 | 97       | 29.8 | -                  |
| ≥5                                                                                        | 106      | 63.1 | 114      | 63.3 | 146      | 60.6 | 153      | 65.1 | 164      | 63.6 | 196      | 68.5 | 192      | 67.1 | 228      | 70.2 | -                  |
| <b>Number of male sexual partners past 12 months</b>                                      |          |      |          |      |          |      |          |      |          |      |          |      |          |      |          |      | 0.106              |
| <5                                                                                        | 122      | 72.6 | 129      | 71.7 | 172      | 71.4 | 167      | 71.1 | 195      | 75.6 | 205      | 71.7 | 202      | 70.6 | 212      | 65.2 | -                  |
| ≥5                                                                                        | 46       | 27.4 | 51       | 28.3 | 69       | 28.6 | 68       | 28.9 | 63       | 24.4 | 81       | 28.3 | 84       | 29.4 | 113      | 34.8 | -                  |
| <b>Number of female sexual partners past 12 months</b>                                    |          |      |          |      |          |      |          |      |          |      |          |      |          |      |          |      | 0.039              |
| <5                                                                                        | 129      | 76.8 | 133      | 73.9 | 185      | 76.8 | 179      | 76.2 | 185      | 71.7 | 204      | 71.3 | 206      | 72.0 | 229      | 70.5 | -                  |
| ≥5                                                                                        | 39       | 23.2 | 47       | 26.1 | 56       | 23.2 | 56       | 23.8 | 73       | 28.3 | 82       | 28.7 | 80       | 28.0 | 96       | 29.5 | -                  |
| <b>Condom use with regular male partners in the past 12 months*</b>                       |          |      |          |      |          |      |          |      |          |      |          |      |          |      |          |      | 0.435              |
| <i>Always</i>                                                                             | 11       | 45.8 | 5        | 21.7 | 13       | 39.4 | 13       | 39.4 | 9        | 37.5 | 9        | 29.0 | 10       | 26.3 | 14       | 35.9 | -                  |
| <i>Not always</i>                                                                         | 13       | 54.2 | 18       | 78.3 | 20       | 60.6 | 20       | 60.6 | 15       | 62.5 | 22       | 71.0 | 28       | 73.7 | 25       | 64.1 | -                  |
| <b>Anal sexual practice with casual male partners</b>                                     |          |      |          |      |          |      |          |      |          |      |          |      |          |      |          |      |                    |
| <i>Receptive only</i>                                                                     | 6        | 3.8  | 11       | 6.3  | 15       | 6.6  | 13       | 5.7  | 17       | 7.0  | 26       | 9.4  | 16       | 5.8  | 27       | 8.7  | 0.068              |
| <i>Insertive only</i>                                                                     | 19       | 11.9 | 25       | 14.4 | 32       | 14.1 | 27       | 11.8 | 41       | 16.8 | 43       | 15.5 | 43       | 15.6 | 52       | 16.8 | 0.107              |
| <i>Receptive and insertive</i>                                                            | 86       | 54.1 | 96       | 55.2 | 128      | 56.4 | 136      | 59.4 | 132      | 54.1 | 149      | 53.8 | 151      | 54.7 | 182      | 58.9 | 0.670              |
| <i>No anal sex</i>                                                                        | 48       | 30.2 | 42       | 24.1 | 52       | 22.9 | 53       | 23.1 | 54       | 22.1 | 59       | 21.3 | 66       | 23.9 | 48       | 15.5 | 0.003              |
| <b>Condom use with casual male partners in the past 12 months for receptive anal sex*</b> |          |      |          |      |          |      |          |      |          |      |          |      |          |      |          |      | 0.011              |
| <i>Always</i>                                                                             | 54       | 58.7 | 54       | 50.5 | 74       | 51.7 | 77       | 51.7 | 81       | 54.4 | 90       | 51.4 | 79       | 47.3 | 88       | 42.1 | -                  |
| <i>Not always</i>                                                                         | 38       | 41.3 | 53       | 49.5 | 69       | 48.3 | 72       | 48.3 | 68       | 45.6 | 85       | 48.6 | 88       | 52.7 | 121      | 57.9 | -                  |
| <b>Condom use with casual male partners in the past 12 months for insertive anal sex*</b> |          |      |          |      |          |      |          |      |          |      |          |      |          |      |          |      | 0.087              |
| <i>Always</i>                                                                             | 52       | 49.5 | 60       | 49.6 | 79       | 49.4 | 76       | 46.6 | 101      | 58.4 | 100      | 52.1 | 83       | 42.8 | 98       | 41.9 | -                  |
| <i>Not always</i>                                                                         | 53       | 50.5 | 61       | 50.4 | 81       | 50.6 | 87       | 53.4 | 72       | 41.6 | 92       | 47.9 | 111      | 57.2 | 136      | 58.1 | -                  |
| <b>Condom use with regular female partners in the past 12 months*</b>                     |          |      |          |      |          |      |          |      |          |      |          |      |          |      |          |      | 0.837              |
| <i>Always</i>                                                                             | 16       | 22.5 | 16       | 22.2 | 8        | 10.0 | 10       | 13.2 | 17       | 18.9 | 22       | 18.2 | 19       | 18.6 | 24       | 20.5 | -                  |
| <i>Not always</i>                                                                         | 55       | 77.5 | 56       | 77.8 | 72       | 90.0 | 66       | 86.8 | 73       | 81.1 | 99       | 81.8 | 83       | 81.4 | 93       | 79.5 | -                  |
| <b>Condom use with casual female partners in the past 12 months*</b>                      |          |      |          |      |          |      |          |      |          |      |          |      |          |      |          |      | 0.056              |

1  
2  
3  
4  
5  
6  
7  
8  
9  
10  
11  
12  
13  
14  
15  
16  
17  
18  
19  
20  
21  
22  
23  
24  
25  
26  
27  
28  
29  
30  
31  
32  
33  
34  
35  
36  
37  
38  
39  
40  
41  
42  
43  
44  
45  
46

|                   |    |      |    |      |     |      |     |      |     |      |     |      |     |      |     |      |   |
|-------------------|----|------|----|------|-----|------|-----|------|-----|------|-----|------|-----|------|-----|------|---|
| <i>Always</i>     | 46 | 34.6 | 54 | 36.2 | 74  | 35.2 | 65  | 32.2 | 74  | 33.6 | 82  | 32.9 | 73  | 29.6 | 80  | 29.0 | - |
| <i>Not always</i> | 87 | 65.4 | 95 | 63.8 | 136 | 64.8 | 137 | 67.8 | 146 | 66.4 | 167 | 67.1 | 174 | 70.4 | 196 | 71.0 | - |

\* 'Not always' was defined as men who sometimes, usually or never used a condom with their sexual partners in the past 12 months (with female partners for vaginal or anal sex, with male partners for anal sex).

For peer review only



**Table S4** Temporal trend of the positivity for sexually transmitted infections and HIV among men who have sex with men only attending a sexual health centre in Melbourne, 2011-2018.

|                                         | 2011            | 2012               | 2013                | 2014               | 2015                | 2016                | 2017                | 2018                | 2011-2014          | 2015-2018          | 2011-2018          |
|-----------------------------------------|-----------------|--------------------|---------------------|--------------------|---------------------|---------------------|---------------------|---------------------|--------------------|--------------------|--------------------|
|                                         | n/N (%)         | n/N (%)            | n/N (%)             | n/N (%)            | n/N (%)             | n/N (%)             | n/N (%)             | n/N (%)             | P <sub>trend</sub> | P <sub>trend</sub> | P <sub>trend</sub> |
| <b>Gonorrhoea</b>                       |                 |                    |                     |                    |                     |                     |                     |                     |                    |                    |                    |
| <i>Oropharyngeal</i>                    | 18/973<br>(1.8) | 28/1,164<br>(2.4)  | 43/1,307<br>(3.3)   | 42/1,340<br>(3.1)  | 122/1,539<br>(7.9)  | 130/1,709<br>(7.6)  | 154/1,803<br>(8.5)  | 145/1,975<br>(7.3)  | 0.037              | 0.755              | NA                 |
| <i>Urethral</i> <sup>*</sup>            | 38/961<br>(4.0) | 36/1,155<br>(3.1)  | 47/1,291<br>(3.6)   | 40/1,325<br>(3.0)  | 56/1,528<br>(3.7)   | 55/1,691<br>(3.3)   | 63/1,782<br>(3.5)   | 55/1,966<br>(2.8)   | 0.364              | 0.215              | NA                 |
| <i>Anorectal</i>                        | 25/922<br>(2.7) | 42/1,082<br>(3.9)  | 70/1,209<br>(5.8)   | 71/1,260<br>(5.6)  | 128/1,431<br>(8.9)  | 115/1,591<br>(7.2)  | 132/1,686<br>(7.8)  | 162/1,899<br>(8.5)  | 0.001              | 0.954              | NA                 |
| <i>Any anatomical site</i> <sup>†</sup> | 66/986<br>(6.7) | 81/1,178<br>(6.9)  | 122/1,324<br>(9.2)  | 130/1,349<br>(9.6) | 215/1,552<br>(13.9) | 220/1,738<br>(12.7) | 241/1,826<br>(13.2) | 246/1,998<br>(12.3) | 0.002              | 0.261              | NA                 |
| <b>Chlamydia</b>                        |                 |                    |                     |                    |                     |                     |                     |                     |                    |                    |                    |
| <i>Urethral</i>                         | 30/961<br>(3.1) | 43/1,155<br>(3.7)  | 48/1,291<br>(3.7)   | 38/1,325<br>(2.9)  | 68/1,528<br>(4.5)   | 64/1,691<br>(3.8)   | 51/1,782<br>(2.9)   | 68/1,966<br>(3.5)   | 0.652              | 0.067              | NA                 |
| <i>Anorectal</i>                        | 63/922<br>(6.8) | 80/1,081<br>(7.4)  | 108/1,210<br>(8.9)  | 97/1,254<br>(7.7)  | 126/1,412<br>(8.9)  | 164/1,589<br>(10.3) | 162/1,681<br>(9.6)  | 189/1,894<br>(10.0) | 0.282              | 0.489              | NA                 |
| <i>Any anatomical site</i> <sup>†</sup> | 86/989<br>(8.7) | 114/1,178<br>(9.7) | 142/1,325<br>(10.7) | 128/1,348<br>(9.5) | 178/1,542<br>(11.5) | 199/1,721<br>(11.6) | 196/1,806<br>(10.9) | 229/1,982<br>(11.6) | 0.436              | 0.869              | NA                 |
| <b>Syphilis</b>                         | 43/778<br>(5.5) | 79/1,129<br>(7.0)  | 73/1,290<br>(5.7)   | 80/1,313<br>(6.1)  | 103/1,517<br>(6.8)  | 130/1,671<br>(7.8)  | 137/1,702<br>(8.0)  | 152/1,917<br>(7.8)  | -                  | -                  | 0.012              |
| <b>HIV (new diagnosis)</b> <sup>‡</sup> | 22/900<br>(2.4) | 36/1,092<br>(3.3)  | 22/1,250<br>(1.8)   | 35/1,269<br>(2.8)  | 29/1,481<br>(2.0)   | 35/1,608<br>(2.2)   | 38/1,647<br>(2.3)   | 45/1,855<br>(2.4)   | -                  | -                  | 0.488              |

Note. *n* represents the number of MSM with a positive result and *N* the number of MSM tested. NA: not applicable; MSM: men who have sex with men;

\*Before 2015, urethral gonorrhoea testing was only performed among symptomatic MSM with urethral symptoms or self-reported as contact of infection. The number of people tested corresponds to the number of people tested for urethral chlamydia; † Any anatomical site for gonorrhoea includes urethral, anorectal and oropharyngeal; while any site for chlamydia includes urethral and anorectal; ‡ Only including HIV cases diagnosed on the day of the first visit.

**Table S5** Temporal trend of the positivity for sexually transmitted infections and HIV among men who have sex with men and women attending a sexual health centre in Melbourne, 2011-2018.

|                              | 2011            | 2012            | 2013            | 2014            | 2015            | 2016             | 2017            | 2018            | 2011-2014          | 2015-2018          | 2011-2018          |
|------------------------------|-----------------|-----------------|-----------------|-----------------|-----------------|------------------|-----------------|-----------------|--------------------|--------------------|--------------------|
|                              | n/N (%)          | n/N (%)         | n/N (%)         | P <sub>trend</sub> | P <sub>trend</sub> | P <sub>trend</sub> |
| <b>Gonorrhoea</b>            |                 |                 |                 |                 |                 |                  |                 |                 |                    |                    |                    |
| <i>Oropharyngeal</i>         | 1/150<br>(0.7)  | 2/154<br>(1.3)  | 7/209<br>(3.3)  | 3/209<br>(1.4)  | 14/220<br>(6.4) | 12/238<br>(5.0)  | 17/246<br>(6.9) | 12/285<br>(4.2) | 0.387              | 0.448              | NA                 |
| <i>Urethral</i> *            | 3/163<br>(1.8)  | 5/172<br>(2.9)  | 9/230<br>(3.8)  | 6/219<br>(2.7)  | 7/247<br>(2.8)  | 10/271<br>(3.7)  | 7/275<br>(2.5)  | 5/308<br>(1.6)  | 0.539              | 0.241              | NA                 |
| <i>Anorectal</i>             | 4/128<br>(3.1)  | 5/122<br>(4.1)  | 4/172<br>(2.3)  | 4/172<br>(2.3)  | 6/173<br>(3.5)  | 14/191<br>(7.3)  | 12/207<br>(5.8) | 9/239<br>(3.8)  | 0.492              | 0.784              | NA                 |
| <i>Any anatomical site</i> † | 7/153<br>(4.6)  | 9/160<br>(5.7)  | 15/225<br>(6.8) | 13/218<br>(6.1) | 20/232<br>(8.7) | 27/267<br>(10.3) | 27/293<br>(9.6) | 22/330<br>(7.1) | 0.530              | 0.304              | NA                 |
| <b>Chlamydia</b>             |                 |                 |                 |                 |                 |                  |                 |                 |                    |                    |                    |
| <i>Urethral</i> *            | 4/163<br>(2.5)  | 11/172<br>(6.4) | 12/230<br>(5.2) | 5/219<br>(2.3)  | 10/247<br>(4.0) | 12/271<br>(4.4)  | 6/275<br>(2.2)  | 13/308<br>(4.2) | 0.667              | 0.778              | NA                 |
| <i>Anorectal</i>             | 10/128<br>(7.8) | 9/122<br>(7.4)  | 6/173<br>(3.5)  | 4/172<br>(2.3)  | 10/173<br>(5.8) | 11/191<br>(5.8)  | 14/206<br>(6.8) | 19/239<br>(7.9) | 0.010              | 0.320              | NA                 |
| <i>Any anatomical site</i> † | 14/165<br>(8.5) | 15/173<br>(8.7) | 17/233<br>(7.3) | 9/227<br>(4.0)  | 19/249<br>(7.6) | 21/273<br>(7.7)  | 17/277<br>(6.1) | 29/310<br>(9.4) | 0.057              | 0.627              | NA                 |
| <b>Syphilis</b>              | 1/112<br>(0.9)  | 4/166<br>(2.4)  | 6/223<br>(2.7)  | 13/211<br>(6.2) | 7/238<br>(2.9)  | 19/259<br>(7.3)  | 12/265<br>(4.5) | 19/299<br>(6.4) | -                  | -                  | 0.004              |
| <b>HIV (new diagnosis)</b> ‡ | 1/140<br>(0.7)  | 3/166<br>(1.8)  | 1/222<br>(0.5)  | 1/205<br>(0.5)  | 2/237<br>(0.8)  | 0/252<br>(0.0)   | 1/258<br>(0.4)  | 1/294<br>(0.3)  | -                  | -                  | 0.127              |

Note. *n* represents the number of MSM with a positive result and *N* the number of MSM tested; NA: not applicable; MSM: men who have sex with men; \*Before 2015, urethral gonorrhoea testing was only performed among symptomatic MSM with urethral symptoms or self-reported as contact of infection. The number of people tested corresponds to the number of people tested for urethral chlamydia; † Any anatomical site for gonorrhoea includes urethral, anorectal and oropharyngeal; while any site for chlamydia includes urethral and anorectal; ‡ Only including HIV cases diagnosed on the day of the first visit.

**Table S6** Positivity for gonorrhoea, chlamydia, syphilis and HIV among men who have sex with men only and men who have sex with men and women attending a sexual health centre in Melbourne, 2011-2018.

|                                | MSMO               | MSMW-M        | MSMW-W       | Comparison across three groups | Comparison between MSMW-M and MSM-W |
|--------------------------------|--------------------|---------------|--------------|--------------------------------|-------------------------------------|
|                                | n/N (%)            | n/N (%)       | n/N (%)      | P value                        | P value                             |
| <b>Gonorrhoea</b>              |                    |               |              |                                |                                     |
| <i>Oropharyngeal</i>           | 682/11,810 (5.8)   | 44/756 (5.8)  | 18/676 (2.7) | 0.003                          | 0.003                               |
| <i>Urethral*</i>               | 390/11,699 (3.3)   | 25/771 (3.2)  | 23/801 (2.9) | 0.775                          | 0.669                               |
| <i>Rectum</i>                  | 745/11,080 (6.7)   | 40/682 (5.9)  | 14/515 (2.7) | 0.001                          | 0.009                               |
| <i>Any anatomical site</i>     | 1321/11,951 (11.1) | 83/771 (10.8) | 45/756 (6.0) | <0.001                         | 0.001                               |
| <b>Chlamydia</b>               |                    |               |              |                                |                                     |
| <i>Urethral</i>                | 410/11,699 (3.5)   | 27/771 (3.5)  | 37/801 (4.6) | 0.257                          | 0.262                               |
| <i>Anorectal</i>               | 989/11,043 (9.0)   | 56/683 (8.2)  | 16/514 (3.1) | <0.001                         | <0.001                              |
| <i>Any anatomical site†</i>    | 1272/11,891 (10.7) | 74/779 (9.5)  | 49/812 (6.0) | <0.001                         | 0.010                               |
| <b>Syphilis</b>                | 797/11,317 (7.0)   | 36/737 (4.9)  | 25/744 (3.4) | <0.001                         | 0.140                               |
| <b>HIV (new diagnosis)‡</b>    | 262/11,102 (2.4)   | 7/738 (0.9)   | 3/749 (0.4)  | <0.001                         | 0.196                               |
| <b>HIV (previous positive)</b> | 316/12,795 (2.5)   | 6/804 (0.7)   | 1/839 (0.1)  | <0.001                         | 0.051                               |

Note. *n* represents the number of MSM with a positive result and *N* the number of MSM tested. MSM: men who have sex with men; \*Before 2015, urethral gonorrhoea testing was only performed among symptomatic MSM with urethral symptoms or self-reported as contact of infection. The number of people tested corresponds to the number of people tested for urethral chlamydia; † Any anatomical site for gonorrhoea includes urethral, anorectal and oropharyngeal; while any site for chlamydia includes urethral and anorectal; ‡ Only including HIV cases diagnosed on the day of the first visit.

1  
2  
3  
4  
5  
6  
7  
8  
9  
10  
11  
12  
13  
14  
15  
16  
17  
18  
19  
20  
21  
22  
23  
24  
25  
26  
27  
28  
29  
30  
31  
32  
33  
34  
35  
36  
37  
38  
39  
40  
41  
42  
43  
44  
45  
46  
47  
48  
49  
50  
51  
52  
53  
54  
55  
56  
57  
58  
59  
60STROBE Statement—Checklist of items that should be included in reports of *cross-sectional studies*

|                              | Item No | Recommendation                                                                                                                                                                                    | Page, lines                                      |
|------------------------------|---------|---------------------------------------------------------------------------------------------------------------------------------------------------------------------------------------------------|--------------------------------------------------|
| <b>Title and abstract</b>    | 1       | (a) Indicate the study's design with a commonly used term in the title or the abstract                                                                                                            | 1, 3                                             |
|                              |         | (b) Provide in the abstract an informative and balanced summary of what was done and what was found                                                                                               | 3, 1-25<br>4, 1-3                                |
| <b>Introduction</b>          |         |                                                                                                                                                                                                   |                                                  |
| Background/rationale         | 2       | Explain the scientific background and rationale for the investigation being reported                                                                                                              | 6, 1-14                                          |
| Objectives                   | 3       | State specific objectives, including any prespecified hypotheses                                                                                                                                  | 6, 16-23                                         |
| <b>Methods</b>               |         |                                                                                                                                                                                                   |                                                  |
| Study design                 | 4       | Present key elements of study design early in the paper                                                                                                                                           | 7, 1-3                                           |
| Setting                      | 5       | Describe the setting, locations, and relevant dates, including periods of recruitment, exposure, follow-up, and data collection                                                                   | 7, 1-13                                          |
| Participants                 | 6       | (a) Give the eligibility criteria, and the sources and methods of selection of participants                                                                                                       | 7, 15-19                                         |
| Variables                    | 7       | Clearly define all outcomes, exposures, predictors, potential confounders, and effect modifiers. Give diagnostic criteria, if applicable                                                          | 7, 20-24<br>8, 1-18                              |
| Data sources/<br>measurement | 8*      | For each variable of interest, give sources of data and details of methods of assessment (measurement). Describe comparability of assessment methods if there is more than one group              | 7, 5-13<br>7, 20-24                              |
| Bias                         | 9       | Describe any efforts to address potential sources of bias                                                                                                                                         | 7, 17-19<br>8, 20-25                             |
| Study size                   | 10      | Explain how the study size was arrived at                                                                                                                                                         | NA,<br>all eligible<br>subjects were<br>included |
| Quantitative variables       | 11      | Explain how quantitative variables were handled in the analyses. If applicable, describe which groupings were chosen and why                                                                      | 7, 19-24<br>8, 1-2                               |
| Statistical methods          | 12      | (a) Describe all statistical methods, including those used to control for confounding                                                                                                             | 9, 8-25                                          |
|                              |         | (b) Describe any methods used to examine subgroups and interactions                                                                                                                               | 9, 17-25                                         |
|                              |         | (c) Explain how missing data were addressed                                                                                                                                                       | 9, 23-24                                         |
|                              |         | (d) If applicable, describe analytical methods taking account of sampling strategy                                                                                                                | NA,<br>all eligible<br>subjects were<br>included |
|                              |         | (e) Describe any sensitivity analyses                                                                                                                                                             | NA                                               |
| <b>Results</b>               |         |                                                                                                                                                                                                   |                                                  |
| Participants                 | 13*     | (a) Report numbers of individuals at each stage of study—eg numbers potentially eligible, examined for eligibility, confirmed eligible, included in the study, completing follow-up, and analysed | 10, 13-20                                        |
|                              |         | (b) Give reasons for non-participation at each stage                                                                                                                                              | 10, 13-20                                        |
|                              |         | (c) Consider use of a flow diagram                                                                                                                                                                | NA                                               |

|                          |     |                                                                                                                                                                                                              |                                               |
|--------------------------|-----|--------------------------------------------------------------------------------------------------------------------------------------------------------------------------------------------------------------|-----------------------------------------------|
| Descriptive data         | 14* | (a) Give characteristics of study participants (eg demographic, clinical, social) and information on exposures and potential confounders                                                                     | 10, 24-25<br>11, 1-4                          |
|                          |     | (b) Indicate number of participants with missing data for each variable of interest                                                                                                                          | Table 1, Table S1                             |
| Outcome data             | 15* | Report numbers of outcome events or summary measures                                                                                                                                                         | 10, 20-22<br>11, 6-25<br>12, 1-25<br>13, 1-12 |
| Main results             | 16  | (a) Give unadjusted estimates and, if applicable, confounder-adjusted estimates and their precision (eg, 95% confidence interval). Make clear which confounders were adjusted for and why they were included | Table 4, Table 5<br>11, 14-17                 |
|                          |     | (b) Report category boundaries when continuous variables were categorized                                                                                                                                    | 11, 15-19                                     |
|                          |     | (c) If relevant, consider translating estimates of relative risk into absolute risk for a meaningful time period                                                                                             | NA                                            |
| Other analyses           | 17  | Report other analyses done—eg analyses of subgroups and interactions, and sensitivity analyses                                                                                                               | 13, 18-23                                     |
| <b>Discussion</b>        |     |                                                                                                                                                                                                              |                                               |
| Key results              | 18  | Summarise key results with reference to study objectives                                                                                                                                                     | 14, 1-11                                      |
| Limitations              | 19  | Discuss limitations of the study, taking into account sources of potential bias or imprecision. Discuss both direction and magnitude of any potential bias                                                   | 16, 22-25<br>17, 1-15                         |
| Interpretation           | 20  | Give a cautious overall interpretation of results considering objectives, limitations, multiplicity of analyses, results from similar studies, and other relevant evidence                                   | 15, 1-24<br>17, 18-24<br>16, 1-16             |
| Generalisability         | 21  | Discuss the generalisability (external validity) of the study results                                                                                                                                        | 17, 4-8                                       |
| <b>Other information</b> |     |                                                                                                                                                                                                              |                                               |
| Funding                  | 22  | Give the source of funding and the role of the funders for the present study and, if applicable, for the original study on which the present article is based                                                | 20, 12-15                                     |

\*Give information separately for exposed and unexposed groups.

**Note:** An Explanation and Elaboration article discusses each checklist item and gives methodological background and published examples of transparent reporting. The STROBE checklist is best used in conjunction with this article (freely available on the Web sites of PLoS Medicine at <http://www.plosmedicine.org/>, Annals of Internal Medicine at <http://www.annals.org/>, and Epidemiology at <http://www.epidem.com/>). Information on the STROBE Initiative is available at [www.strobe-statement.org](http://www.strobe-statement.org).
