# Supplementary material for: Trends and differences in sexual practices and sexually transmitted infections in men who have sex with men only (MSMO) and men who have sex with men and women (MSMW): a repeated cross-sectional study in Melbourne, Australia
Source: PubMed Central journal article supplement — BMJ Open. 2020 Nov 24;10(11):e037608. doi: 10.1136/bmjopen-2020-037608 (PMC7689083; doi:10.1136/bmjopen-2020-037608), 2020-11-24
Supplement: bmjopen-2020-037608supp001.pdf [file bmjopen-2020-037608supp001.pdf]

## SUPPLEMENTARY MATERIAL

**Trends and differences in sexual practices and sexually transmitted infections in men who have sex with men only (MSMO) and men who have sex with men and women (MSMW): a repeated cross-sectional study in Melbourne, Australia.**

*Mario Martín-Sánchez, Richard Case, Christopher K. Fairley, Jane S. Hocking, Catriona S. Bradshaw, Jason J. Ong, Marcus Y. Chen, Eric P.F. Chow*

|                                                                                                                                                                                                             |   |
|-------------------------------------------------------------------------------------------------------------------------------------------------------------------------------------------------------------|---|
| Table S1 Demographic characteristics and sexual practices among men who have sex with men only and men who have sex with men and women attending a sexual health centre in Melbourne, 2011-2018. ....       | 2 |
| Table S2 Temporal trend of the sexual practices among men who have sex with men only attending a sexual health centre in Melbourne, 2011-2018. ....                                                         | 4 |
| Table S3 Temporal trend of the sexual practices among men who have sex with men and women attending a sexual health centre in Melbourne, 2011-2018. ....                                                    | 5 |
| Table S4 Temporal trend of the positivity for sexually transmitted infections and HIV among men who have sex with men only attending a sexual health centre in Melbourne, 2011-2018. ....                   | 7 |
| Table S5 Temporal trend of the positivity for sexually transmitted infections and HIV among men who have sex with men and women attending a sexual health centre in Melbourne, 2011-2018. ....              | 8 |
| Table S6 Positivity for gonorrhoea, chlamydia, syphilis and HIV among men who have sex with men only and men who have sex with men and women attending a sexual health centre in Melbourne, 2011-2018. .... | 9 |

**Table S1** Demographic characteristics and sexual practices among men who have sex with men only and men who have sex with men and women attending a sexual health centre in Melbourne, 2011-2018.

|                                                                                                               | <b>MSMO<br/>(N=12,795)</b> | <b>MSMW-<br/>M<br/>(N=804)</b> | <b>MSMW-<br/>W<br/>(N=839)</b> | <b>Comparison<br/>across three<br/>groups</b> | <b>Comparison<br/>between<br/>MSMW-M<br/>and MSM-W</b> |
|---------------------------------------------------------------------------------------------------------------|----------------------------|--------------------------------|--------------------------------|-----------------------------------------------|--------------------------------------------------------|
|                                                                                                               | <b>n (%)</b>               | <b>n (%)</b>                   | <b>n (%)</b>                   | <b>P value</b>                                | <b>P value</b>                                         |
| <b>Age (years), median(IQR)</b>                                                                               | 27 (23-33)                 | 29 (24-39)                     | 28 (24-36)                     | <0.001                                        | 0.845                                                  |
| <b>Country of birth</b>                                                                                       |                            |                                |                                | <0.001                                        | 0.167                                                  |
| <i>Australia</i>                                                                                              | 6,208 (48.5)               | 465 (57.8)                     | 452 (53.9)                     |                                               |                                                        |
| <i>Overseas</i>                                                                                               | 6,110 (47.8)               | 297 (36.9)                     | 348 (41.5)                     |                                               |                                                        |
| <i>No information</i>                                                                                         | 477 (3.7)                  | 42 (5.2)                       | 39 (4.5)                       |                                               |                                                        |
| <b>Aboriginal and Torres Strait<br/>Islander Status</b>                                                       |                            |                                |                                | 0.280                                         | 0.254                                                  |
| <i>Indigenous origin</i>                                                                                      | 150 (1.2)                  | 10 (1.2)                       | 5 (0.6)                        |                                               |                                                        |
| <i>Non-Indigenous origin</i>                                                                                  | 11,595 (90.6)              | 715 (88.9)                     | 762 (90.8)                     |                                               |                                                        |
| <i>No information</i>                                                                                         | 1,050 (8.2)                | 79 (9.8)                       | 72 (8.6)                       |                                               |                                                        |
| <b>Sex overseas in the past 12<br/>months</b>                                                                 |                            |                                |                                | <0.001                                        | 0.002                                                  |
| <i>Yes</i>                                                                                                    | 4,415 (34.5)               | 278 (34.6)                     | 361 (43.0)                     |                                               |                                                        |
| <i>No</i>                                                                                                     | 7,571 (59.2)               | 470 (58.5)                     | 433 (51.6)                     |                                               |                                                        |
| <i>No information</i>                                                                                         | 809 (6.3)                  | 56 (7.0)                       | 45 (5.4)                       |                                               |                                                        |
| <b>Sex work during lifetime</b>                                                                               |                            |                                |                                | 0.454                                         | 0.722                                                  |
| <i>Yes</i>                                                                                                    | 71 (0.6)                   | 7 (0.9)                        | 6 (0.7)                        |                                               |                                                        |
| <i>No</i>                                                                                                     | 12,724 (99.4)              | 797 (99.1)                     | 833 (99.3)                     |                                               |                                                        |
| <b>Injected drug use in past 12<br/>months</b>                                                                |                            |                                |                                | <0.001                                        | 0.777                                                  |
| <i>Yes</i>                                                                                                    | 211 (1.6)                  | 17 (2.1)                       | 21 (2.5)                       |                                               |                                                        |
| <i>No</i>                                                                                                     | 12,363 (96.6)              | 763 (95.7)                     | 797 (97.5)                     |                                               |                                                        |
| <i>No information</i>                                                                                         | 221 (1.7)                  | 17 (2.1)                       | 21 (2.5)                       |                                               |                                                        |
| <b>Number of male and female<br/>sexual partners in the past 12<br/>months, median (IQR)</b>                  | 5 (3-10)                   | 7 (5-12)                       | 6 (4-11)                       | <0.001                                        | <0.001                                                 |
| <b>Number of male sexual partners<br/>in the past 12 months, median<br/>(IQR)</b>                             | 5 (3-10)                   | 5 (3-10)                       | 1 (1-2)                        | <0.001                                        | <0.001                                                 |
| <b>Number of female sexual<br/>partners in the past 12 months,<br/>median (IQR)</b>                           | NA                         | 1 (1-2)                        | 5 (3-8)                        | NA                                            | <0.001                                                 |
| <b>Regular sexual partner</b>                                                                                 |                            |                                |                                | NA                                            | <0.001                                                 |
| <i>No regular partner</i>                                                                                     | 7,513 (58.7)               | 433 (53.9)                     | 453 (54.1)                     |                                               |                                                        |
| <i>Regular male partner</i>                                                                                   | 5,132 (40.1)               | 138 (17.2)                     | 11 (1.3)                       |                                               |                                                        |
| <i>Regular female partner</i>                                                                                 | NA                         | 195 (24.3)                     | 350 (41.7)                     |                                               |                                                        |
| <i>Regular female and male partner</i>                                                                        | NA                         | 37 (4.6)                       | 23 (2.7)                       |                                               |                                                        |
| <i>No information</i>                                                                                         | 150 (1.2)                  | 1 (0.1)                        | 2 (0.2)                        |                                               |                                                        |
| <b>Anal sexual practice with regular<br/>male partners<sup>a</sup></b>                                        |                            |                                |                                | <0.001                                        | 0.001                                                  |
| <i>Receptive only</i>                                                                                         | 435 (8.5)                  | 10 (5.7)                       | 2 (5.7)                        |                                               |                                                        |
| <i>Insertive only</i>                                                                                         | 465 (9.1)                  | 13 (7.4)                       | 0 (0)                          |                                               |                                                        |
| <i>Receptive and insertive</i>                                                                                | 3,921 (76.4)               | 145 (82.4)                     | 26 (74.3)                      |                                               |                                                        |
| <i>No anal sex</i>                                                                                            | 234 (4.6)                  | 6 (3.4)                        | 2 (5.7)                        |                                               |                                                        |
| <i>No information</i>                                                                                         | 79 (1.5)                   | 2 (1.1)                        | 5 (14.3)                       |                                               |                                                        |
| <b>Condom use with regular male<br/>partners in the past 12 months<br/>for receptive anal sex<sup>b</sup></b> |                            |                                |                                | 0.150                                         | 0.275                                                  |
| <i>Always</i>                                                                                                 | 1,241 (28.5)               | 50 (32.3)                      | 12 (42.9)                      |                                               |                                                        |
| <i>Not always</i>                                                                                             | 3,115 (71.5)               | 105 (67.7)                     | 16 (57.1)                      |                                               |                                                        |
| <b>Condom use with regular male<br/>partners in the past 12 months<br/>for insertive anal sex<sup>c</sup></b> |                            |                                |                                | 0.142                                         | 0.935                                                  |
| <i>Always</i>                                                                                                 | 1,254 (28.6)               | 56 (35.4)                      | 9 (34.6)                       |                                               |                                                        |
| <i>Not always</i>                                                                                             | 3,132 (71.4)               | 102 (64.6)                     | 17 (65.4)                      |                                               |                                                        |

|                                                                                                       |               |            |            |        |        |
|-------------------------------------------------------------------------------------------------------|---------------|------------|------------|--------|--------|
| <b>Vaginal or anal sex with regular female partner<sup>d</sup></b>                                    |               |            |            | NA     | 0.903  |
| <i>Yes</i>                                                                                            | NA            | 223 (96.1) | 361 (96.8) |        |        |
| <i>No</i>                                                                                             | NA            | 4 (1.7)    | 5 (1.3)    |        |        |
| <i>No information</i>                                                                                 | NA            | 5 (2.2)    | 7 (1.9)    |        |        |
| <b>Condom use with regular female partners in the past 12 months<sup>e*</sup></b>                     |               |            |            | NA     | 0.551  |
| <i>Always</i>                                                                                         | NA            | 42 (18.8)  | 61 (16.9)  |        |        |
| <i>Not always</i>                                                                                     | NA            | 181 (81.2) | 300 (83.1) |        |        |
| <b>Casual sexual partner</b>                                                                          |               |            |            | NA     | <0.001 |
| <i>No casual partner</i>                                                                              | 806 (6.3)     | 0          | 0          |        |        |
| <i>Casual male partner(s)</i>                                                                         | 11,969 (93.5) | 112 (13.9) | 0          |        |        |
| <i>Casual female partner(s)</i>                                                                       | NA            | 0          | 19 (2.3)   |        |        |
| <i>Casual female and male partner(s)</i>                                                              | NA            | 692 (86.1) | 820 (97.7) |        |        |
| <i>No information</i>                                                                                 | 20 (0.2)      | 0          | 0          |        |        |
| <b>Anal sexual practice with casual male partners</b>                                                 |               |            |            | <0.001 | <0.001 |
| <i>Receptive only</i>                                                                                 | 1,262 (9.9)   | 45 (5.6)   | 64 (7.6)   |        |        |
| <i>Insertive only</i>                                                                                 | 1,344 (10.5)  | 116 (14.4) | 119 (14.2) |        |        |
| <i>Receptive and insertive</i>                                                                        | 7,835 (61.2)  | 524 (65.2) | 407 (48.5) |        |        |
| <i>No anal sex</i>                                                                                    | 1,692 (13.2)  | 108 (13.4) | 210 (25.0) |        |        |
| <i>No information</i>                                                                                 | 662 (5.2)     | 11 (1.4)   | 39 (4.6)   |        |        |
| <b>Condom use with casual male partners in the past 12 months for receptive anal sex<sup>f*</sup></b> |               |            |            | 0.004  | 0.004  |
| <i>Always</i>                                                                                         | 4,207 (46.2)  | 256 (45.0) | 254 (53.9) |        |        |
| <i>Not always</i>                                                                                     | 4,890 (53.8)  | 313 (55.0) | 217 (46.1) |        |        |
| <b>Condom use with casual male partners in the past 12 months for insertive anal sex<sup>g*</sup></b> |               |            |            | 0.003  | 0.001  |
| <i>Always</i>                                                                                         | 4,276 (46.6)  | 275 (43.0) | 278 (52.9) |        |        |
| <i>Not always</i>                                                                                     | 4,903 (53.4)  | 365 (57.0) | 248 (47.1) |        |        |
| <b>Vaginal or anal sex with casual female partner</b>                                                 |               |            |            | -      | <0.001 |
| <i>Yes</i>                                                                                            | NA            | 658 (81.8) | 799 (95.2) |        |        |
| <i>No</i>                                                                                             | NA            | 19 (2.4)   | 24 (2.9)   |        |        |
| <i>No information</i>                                                                                 | NA            | 127 (15.8) | 16 (1.9)   |        |        |
| <b>Condom use with casual female partners in the past 12 months<sup>h*</sup></b>                      |               |            |            | -      | <0.001 |
| <i>Always</i>                                                                                         | NA            | 257 (39.1) | 195 (24.4) |        |        |
| <i>Not always</i>                                                                                     | NA            | 401 (60.9) | 604 (75.6) |        |        |

Note. NA: Not applicable; IQR: Interquartile range; MSM: men who have sex with men; MSMO: men who have sex with men only; MSMW-W: men who have sex with men and women and had more female than male sexual partner in the past 12 months; MSMW-M: men who have sex with men and women and had more male than female sexual partner in the past 12 months; <sup>a</sup>Only including MSM with regular male partners or regular male and female partners; <sup>b</sup>Only including MSM that referred receptive only or receptive and insertive anal sex with regular male partners; <sup>c</sup>Only including MSM with regular female partners or regular male and female partners; <sup>d</sup>Only including MSM that referred vaginal or anal sex with regular female partner; <sup>e</sup>Only including MSM that referred receptive only or receptive and insertive anal sex with casual male partners; <sup>f</sup>Only including MSM that referred insertive only or receptive and insertive anal sex with casual male partners, <sup>g</sup>Only including MSM that referred vaginal or anal sex with casual female partners; <sup>h</sup>Not always' was defined as men who sometimes, usually or never used a condom with their sexual partners in the past 12 months (with female partners for vaginal and/or anal sex, with male partners for anal sex).

**Table S2** Temporal trend of the sexual practices among men who have sex with men only attending a sexual health centre in Melbourne, 2011-2018.

|                                                                                           | 2011 |      | 2012 |      | 2013 |      | 2014 |      | 2015 |      | 2016 |      | 2017 |      | 2018 |      | P <sub>trend</sub> |
|-------------------------------------------------------------------------------------------|------|------|------|------|------|------|------|------|------|------|------|------|------|------|------|------|--------------------|
|                                                                                           | n    | %    | n    | %    | n    | %    | n    | %    | n    | %    | n    | %    | n    | %    | n    | %    |                    |
| <b>Number of sexual partners in the past 12 months</b>                                    |      |      |      |      |      |      |      |      |      |      |      |      |      |      |      |      | 0.002              |
| <5                                                                                        | 515  | 49.2 | 598  | 46.6 | 645  | 45.4 | 626  | 43.7 | 686  | 41.4 | 802  | 42.8 | 859  | 44.3 | 934  | 43.6 | -                  |
| ≥5                                                                                        | 532  | 50.8 | 684  | 53.4 | 777  | 54.6 | 807  | 56.3 | 972  | 58.6 | 1070 | 57.2 | 1079 | 55.7 | 1209 | 56.4 | -                  |
| <b>Condom use with regular male partners in the past 12 months*</b>                       |      |      |      |      |      |      |      |      |      |      |      |      |      |      |      |      | <0.001             |
| <i>Always</i>                                                                             | 134  | 30.8 | 164  | 31.2 | 160  | 30.0 | 142  | 26.3 | 167  | 27.6 | 201  | 28.5 | 139  | 19.4 | 165  | 21.6 | -                  |
| <i>Not always</i>                                                                         | 301  | 69.2 | 362  | 68.8 | 373  | 70.0 | 398  | 73.7 | 437  | 72.4 | 504  | 71.5 | 576  | 80.6 | 598  | 78.4 | -                  |
| <b>Anal sexual practice with casual male partners</b>                                     |      |      |      |      |      |      |      |      |      |      |      |      |      |      |      |      |                    |
| <i>Receptive only</i>                                                                     | 74   | 7.5  | 109  | 9.1  | 109  | 8.1  | 140  | 10.3 | 151  | 9.5  | 196  | 11.0 | 218  | 11.8 | 265  | 13.0 | <0.001             |
| <i>Insertive only</i>                                                                     | 98   | 10.0 | 133  | 11.0 | 153  | 11.4 | 150  | 11.1 | 178  | 11.3 | 205  | 11.5 | 194  | 10.5 | 233  | 11.4 | 0.580              |
| <i>Receptive and insertive</i>                                                            | 634  | 64.5 | 750  | 62.3 | 847  | 63.3 | 877  | 64.6 | 1050 | 66.4 | 1177 | 66.2 | 1207 | 65.2 | 1293 | 63.4 | 0.396              |
| <i>No anal sex</i>                                                                        | 177  | 18.0 | 212  | 17.6 | 229  | 17.1 | 190  | 14.0 | 203  | 12.8 | 201  | 11.3 | 233  | 12.6 | 247  | 12.1 | <0.001             |
| <b>Condom use with casual male partners in the past 12 months for receptive anal sex*</b> |      |      |      |      |      |      |      |      |      |      |      |      |      |      |      |      | <0.001             |
| <i>Always</i>                                                                             | 381  | 53.8 | 480  | 55.9 | 523  | 54.7 | 522  | 51.3 | 576  | 48.0 | 596  | 43.4 | 557  | 39.1 | 572  | 36.7 | -                  |
| <i>Not always</i>                                                                         | 327  | 46.2 | 379  | 44.1 | 433  | 45.3 | 495  | 48.7 | 625  | 52.0 | 777  | 56.6 | 868  | 60.9 | 986  | 63.3 | -                  |
| <b>Condom use with casual male partners in the past 12 months for insertive anal sex*</b> |      |      |      |      |      |      |      |      |      |      |      |      |      |      |      |      | <0.001             |
| <i>Always</i>                                                                             | 397  | 54.2 | 489  | 55.4 | 531  | 53.1 | 526  | 51.2 | 607  | 49.4 | 620  | 44.9 | 559  | 39.9 | 547  | 35.8 | -                  |
| <i>Not always</i>                                                                         | 335  | 45.8 | 394  | 44.6 | 469  | 46.9 | 501  | 48.8 | 621  | 50.6 | 762  | 55.1 | 842  | 60.1 | 979  | 64.2 | -                  |

\* 'Not always' was defined as men who sometimes, usually or never used a condom with their sexual partners in the past 12 months (with female partners for vaginal or anal sex, with male partners for anal sex).

**Table S3** Temporal trend of the sexual practices among men who have sex with men and women attending a sexual health centre in Melbourne, 2011-2018.

|                                                                                           | 2011 |      | 2012 |      | 2013 |      | 2014 |      | 2015 |      | 2016 |      | 2017 |      | 2018 |      | 2011-18            |
|-------------------------------------------------------------------------------------------|------|------|------|------|------|------|------|------|------|------|------|------|------|------|------|------|--------------------|
|                                                                                           | n    | %    | n    | %    | n    | %    | n    | %    | n    | %    | n    | %    | n    | %    | n    | %    | P <sub>trend</sub> |
| <b>Number of sexual partners past 12 months</b>                                           |      |      |      |      |      |      |      |      |      |      |      |      |      |      |      |      | 0.014              |
| <5                                                                                        | 62   | 36.9 | 66   | 36.7 | 95   | 39.4 | 82   | 34.9 | 94   | 36.4 | 90   | 31.5 | 94   | 32.9 | 97   | 29.8 | -                  |
| ≥5                                                                                        | 106  | 63.1 | 114  | 63.3 | 146  | 60.6 | 153  | 65.1 | 164  | 63.6 | 196  | 68.5 | 192  | 67.1 | 228  | 70.2 | -                  |
| <b>Number of male sexual partners past 12 months</b>                                      |      |      |      |      |      |      |      |      |      |      |      |      |      |      |      |      | 0.106              |
| <5                                                                                        | 122  | 72.6 | 129  | 71.7 | 172  | 71.4 | 167  | 71.1 | 195  | 75.6 | 205  | 71.7 | 202  | 70.6 | 212  | 65.2 | -                  |
| ≥5                                                                                        | 46   | 27.4 | 51   | 28.3 | 69   | 28.6 | 68   | 28.9 | 63   | 24.4 | 81   | 28.3 | 84   | 29.4 | 113  | 34.8 | -                  |
| <b>Number of female sexual partners past 12 months</b>                                    |      |      |      |      |      |      |      |      |      |      |      |      |      |      |      |      | 0.039              |
| <5                                                                                        | 129  | 76.8 | 133  | 73.9 | 185  | 76.8 | 179  | 76.2 | 185  | 71.7 | 204  | 71.3 | 206  | 72.0 | 229  | 70.5 | -                  |
| ≥5                                                                                        | 39   | 23.2 | 47   | 26.1 | 56   | 23.2 | 56   | 23.8 | 73   | 28.3 | 82   | 28.7 | 80   | 28.0 | 96   | 29.5 | -                  |
| <b>Condom use with regular male partners in the past 12 months*</b>                       |      |      |      |      |      |      |      |      |      |      |      |      |      |      |      |      | 0.435              |
| <i>Always</i>                                                                             | 11   | 45.8 | 5    | 21.7 | 13   | 39.4 | 13   | 39.4 | 9    | 37.5 | 9    | 29.0 | 10   | 26.3 | 14   | 35.9 | -                  |
| <i>Not always</i>                                                                         | 13   | 54.2 | 18   | 78.3 | 20   | 60.6 | 20   | 60.6 | 15   | 62.5 | 22   | 71.0 | 28   | 73.7 | 25   | 64.1 | -                  |
| <b>Anal sexual practice with casual male partners</b>                                     |      |      |      |      |      |      |      |      |      |      |      |      |      |      |      |      |                    |
| <i>Receptive only</i>                                                                     | 6    | 3.8  | 11   | 6.3  | 15   | 6.6  | 13   | 5.7  | 17   | 7.0  | 26   | 9.4  | 16   | 5.8  | 27   | 8.7  | 0.068              |
| <i>Insertive only</i>                                                                     | 19   | 11.9 | 25   | 14.4 | 32   | 14.1 | 27   | 11.8 | 41   | 16.8 | 43   | 15.5 | 43   | 15.6 | 52   | 16.8 | 0.107              |
| <i>Receptive and insertive</i>                                                            | 86   | 54.1 | 96   | 55.2 | 128  | 56.4 | 136  | 59.4 | 132  | 54.1 | 149  | 53.8 | 151  | 54.7 | 182  | 58.9 | 0.670              |
| <i>No anal sex</i>                                                                        | 48   | 30.2 | 42   | 24.1 | 52   | 22.9 | 53   | 23.1 | 54   | 22.1 | 59   | 21.3 | 66   | 23.9 | 48   | 15.5 | 0.003              |
| <b>Condom use with casual male partners in the past 12 months for receptive anal sex*</b> |      |      |      |      |      |      |      |      |      |      |      |      |      |      |      |      | 0.011              |
| <i>Always</i>                                                                             | 54   | 58.7 | 54   | 50.5 | 74   | 51.7 | 77   | 51.7 | 81   | 54.4 | 90   | 51.4 | 79   | 47.3 | 88   | 42.1 | -                  |
| <i>Not always</i>                                                                         | 38   | 41.3 | 53   | 49.5 | 69   | 48.3 | 72   | 48.3 | 68   | 45.6 | 85   | 48.6 | 88   | 52.7 | 121  | 57.9 | -                  |
| <b>Condom use with casual male partners in the past 12 months for insertive anal sex*</b> |      |      |      |      |      |      |      |      |      |      |      |      |      |      |      |      | 0.087              |
| <i>Always</i>                                                                             | 52   | 49.5 | 60   | 49.6 | 79   | 49.4 | 76   | 46.6 | 101  | 58.4 | 100  | 52.1 | 83   | 42.8 | 98   | 41.9 | -                  |
| <i>Not always</i>                                                                         | 53   | 50.5 | 61   | 50.4 | 81   | 50.6 | 87   | 53.4 | 72   | 41.6 | 92   | 47.9 | 111  | 57.2 | 136  | 58.1 | -                  |
| <b>Condom use with regular female partners in the past 12 months*</b>                     |      |      |      |      |      |      |      |      |      |      |      |      |      |      |      |      | 0.837              |
| <i>Always</i>                                                                             | 16   | 22.5 | 16   | 22.2 | 8    | 10.0 | 10   | 13.2 | 17   | 18.9 | 22   | 18.2 | 19   | 18.6 | 24   | 20.5 | -                  |
| <i>Not always</i>                                                                         | 55   | 77.5 | 56   | 77.8 | 72   | 90.0 | 66   | 86.8 | 73   | 81.1 | 99   | 81.8 | 83   | 81.4 | 93   | 79.5 | -                  |
| <b>Condom use with casual female partners in the past 12 months*</b>                      |      |      |      |      |      |      |      |      |      |      |      |      |      |      |      |      | 0.056              |

---

|                   |    |      |    |      |     |      |     |      |     |      |     |      |     |      |     |      |   |
|-------------------|----|------|----|------|-----|------|-----|------|-----|------|-----|------|-----|------|-----|------|---|
| <i>Always</i>     | 46 | 34.6 | 54 | 36.2 | 74  | 35.2 | 65  | 32.2 | 74  | 33.6 | 82  | 32.9 | 73  | 29.6 | 80  | 29.0 | - |
| <i>Not always</i> | 87 | 65.4 | 95 | 63.8 | 136 | 64.8 | 137 | 67.8 | 146 | 66.4 | 167 | 67.1 | 174 | 70.4 | 196 | 71.0 | - |

---

\* 'Not always' was defined as men who sometimes, usually or never used a condom with their sexual partners in the past 12 months (with female partners for vaginal or anal sex, with male partners for anal sex).

**Table S4** Temporal trend of the positivity for sexually transmitted infections and HIV among men who have sex with men only attending a sexual health centre in Melbourne, 2011-2018.

|                             | 2011            | 2012               | 2013                | 2014               | 2015                | 2016                | 2017                | 2018                | 2011-2014          | 2015-2018          | 2011-2018          |
|-----------------------------|-----------------|--------------------|---------------------|--------------------|---------------------|---------------------|---------------------|---------------------|--------------------|--------------------|--------------------|
|                             | n/N (%)         | n/N (%)            | n/N (%)             | n/N (%)            | n/N (%)             | n/N (%)             | n/N (%)             | n/N (%)             | P <sub>trend</sub> | P <sub>trend</sub> | P <sub>trend</sub> |
| <b>Gonorrhoea</b>           |                 |                    |                     |                    |                     |                     |                     |                     |                    |                    |                    |
| <i>Oropharyngeal</i>        | 18/973<br>(1.8) | 28/1,164<br>(2.4)  | 43/1,307<br>(3.3)   | 42/1,340<br>(3.1)  | 122/1,539<br>(7.9)  | 130/1,709<br>(7.6)  | 154/1,803<br>(8.5)  | 145/1,975<br>(7.3)  | 0.037              | 0.755              | NA                 |
| <i>Urethral*</i>            | 38/961<br>(4.0) | 36/1,155<br>(3.1)  | 47/1,291<br>(3.6)   | 40/1,325<br>(3.0)  | 56/1,528<br>(3.7)   | 55/1,691<br>(3.3)   | 63/1,782<br>(3.5)   | 55/1,966<br>(2.8)   | 0.364              | 0.215              | NA                 |
| <i>Anorectal</i>            | 25/922<br>(2.7) | 42/1,082<br>(3.9)  | 70/1,209<br>(5.8)   | 71/1,260<br>(5.6)  | 128/1,431<br>(8.9)  | 115/1,591<br>(7.2)  | 132/1,686<br>(7.8)  | 162/1,899<br>(8.5)  | 0.001              | 0.954              | NA                 |
| <i>Any anatomical site†</i> | 66/986<br>(6.7) | 81/1,178<br>(6.9)  | 122/1,324<br>(9.2)  | 130/1,349<br>(9.6) | 215/1,552<br>(13.9) | 220/1,738<br>(12.7) | 241/1,826<br>(13.2) | 246/1,998<br>(12.3) | 0.002              | 0.261              | NA                 |
| <b>Chlamydia</b>            |                 |                    |                     |                    |                     |                     |                     |                     |                    |                    |                    |
| <i>Urethral</i>             | 30/961<br>(3.1) | 43/1,155<br>(3.7)  | 48/1,291<br>(3.7)   | 38/1,325<br>(2.9)  | 68/1,528<br>(4.5)   | 64/1,691<br>(3.8)   | 51/1,782<br>(2.9)   | 68/1,966<br>(3.5)   | 0.652              | 0.067              | NA                 |
| <i>Anorectal</i>            | 63/922<br>(6.8) | 80/1,081<br>(7.4)  | 108/1,210<br>(8.9)  | 97/1,254<br>(7.7)  | 126/1,412<br>(8.9)  | 164/1,589<br>(10.3) | 162/1,681<br>(9.6)  | 189/1,894<br>(10.0) | 0.282              | 0.489              | NA                 |
| <i>Any anatomical site†</i> | 86/989<br>(8.7) | 114/1,178<br>(9.7) | 142/1,325<br>(10.7) | 128/1,348<br>(9.5) | 178/1,542<br>(11.5) | 199/1,721<br>(11.6) | 196/1,806<br>(10.9) | 229/1,982<br>(11.6) | 0.436              | 0.869              | NA                 |
| <b>Syphilis</b>             | 43/778<br>(5.5) | 79/1,129<br>(7.0)  | 73/1,290<br>(5.7)   | 80/1,313<br>(6.1)  | 103/1,517<br>(6.8)  | 130/1,671<br>(7.8)  | 137/1,702<br>(8.0)  | 152/1,917<br>(7.9)  | -                  | -                  | 0.012              |
| <b>HIV (new diagnosis)‡</b> | 22/900<br>(2.4) | 36/1,092<br>(3.3)  | 22/1,250<br>(1.8)   | 35/1,269<br>(2.8)  | 29/1,481<br>(2.0)   | 35/1,608<br>(2.2)   | 38/1,647<br>(2.3)   | 45/1,855<br>(2.4)   | -                  | -                  | 0.488              |

Note. *n* represents de number of MSM with a positive result and *N* the number of MSM tested. NA: not applicable; MSM: men who have sex with men;

\*Before 2015, urethral gonorrhoea testing was only performed among symptomatic MSM with urethral symptoms or self-reported as contact of infection. The number of people tested corresponds to the number of people tested for urethral chlamydia; † Any anatomical site for gonorrhoea includes urethral, anorectal and oropharyngeal; while any site for chlamydia includes urethral and anorectal; ‡ Only including HIV cases diagnosed on the day of the first visit.

**Table S5** Temporal trend of the positivity for sexually transmitted infections and HIV among men who have sex with men and women attending a sexual health centre in Melbourne, 2011-2018.

|                              | 2011            | 2012            | 2013            | 2014            | 2015            | 2016             | 2017            | 2018            | 2011-2014          | 2015-2018          | 2011-2018          |
|------------------------------|-----------------|-----------------|-----------------|-----------------|-----------------|------------------|-----------------|-----------------|--------------------|--------------------|--------------------|
|                              | n/N (%)          | n/N (%)         | n/N (%)         | P <sub>trend</sub> | P <sub>trend</sub> | P <sub>trend</sub> |
| <b>Gonorrhoea</b>            |                 |                 |                 |                 |                 |                  |                 |                 |                    |                    |                    |
| <i>Oropharyngeal</i>         | 1/150<br>(0.7)  | 2/154<br>(1.3)  | 7/209<br>(3.3)  | 3/209<br>(1.4)  | 14/220<br>(6.4) | 12/238<br>(5.0)  | 17/246<br>(6.9) | 12/285<br>(4.2) | 0.387              | 0.448              | NA                 |
| <i>Urethral</i> *            | 3/163<br>(1.8)  | 5/172<br>(2.9)  | 9/230<br>(3.8)  | 6/219<br>(2.7)  | 7/247<br>(2.8)  | 10/271<br>(3.7)  | 7/275<br>(2.5)  | 5/308<br>(1.6)  | 0.539              | 0.241              | NA                 |
| <i>Anorectal</i>             | 4/128<br>(3.1)  | 5/122<br>(4.1)  | 4/172<br>(2.3)  | 4/172<br>(2.3)  | 6/173<br>(3.5)  | 14/191<br>(7.3)  | 12/207<br>(5.8) | 9/239<br>(3.8)  | 0.492              | 0.784              | NA                 |
| <i>Any anatomical site</i> † | 7/153<br>(4.6)  | 9/160<br>(5.7)  | 15/225<br>(6.8) | 13/218<br>(6.1) | 20/232<br>(8.7) | 27/267<br>(10.3) | 27/293<br>(9.6) | 22/330<br>(7.1) | 0.530              | 0.304              | NA                 |
| <b>Chlamydia</b>             |                 |                 |                 |                 |                 |                  |                 |                 |                    |                    |                    |
| <i>Urethral</i> *            | 4/163<br>(2.5)  | 11/172<br>(6.4) | 12/230<br>(5.2) | 5/219<br>(2.3)  | 10/247<br>(4.0) | 12/271<br>(4.4)  | 6/275<br>(2.2)  | 13/308<br>(4.2) | 0.667              | 0.778              | NA                 |
| <i>Anorectal</i>             | 10/128<br>(7.8) | 9/122<br>(7.4)  | 6/173<br>(3.5)  | 4/172<br>(2.3)  | 10/173<br>(5.8) | 11/191<br>(5.8)  | 14/206<br>(6.8) | 19/239<br>(7.9) | 0.010              | 0.320              | NA                 |
| <i>Any anatomical site</i> † | 14/165<br>(8.5) | 15/173<br>(8.7) | 17/233<br>(7.3) | 9/227<br>(4.0)  | 19/249<br>(7.6) | 21/273<br>(7.7)  | 17/277<br>(6.1) | 29/310<br>(9.4) | 0.057              | 0.627              | NA                 |
| <b>Syphilis</b>              | 1/112<br>(0.9)  | 4/166<br>(2.4)  | 6/223<br>(2.7)  | 13/211<br>(6.2) | 7/238<br>(2.9)  | 19/259<br>(7.3)  | 12/265<br>(4.5) | 19/299<br>(6.4) | -                  | -                  | 0.004              |
| <b>HIV (new diagnosis)</b> ‡ | 1/140<br>(0.7)  | 3/166<br>(1.8)  | 1/222<br>(0.5)  | 1/205<br>(0.5)  | 2/237<br>(0.8)  | 0/252<br>(0.0)   | 1/258<br>(0.4)  | 1/294<br>(0.3)  | -                  | -                  | 0.127              |

Note. *n* represents de number of MSM with a positive result and *N* the number of MSM tested; NA: not applicable; MSM: men who have sex with men; \*Before 2015, urethral gonorrhoea testing was only performed among symptomatic MSM with urethral symptoms or self-reported as contact of infection. The number of people tested corresponds to the number of people tested for urethral chlamydia; † Any anatomical site for gonorrhoea includes urethral, anorectal and oropharyngeal; while any site for chlamydia includes urethral and anorectal; ‡ Only including HIV cases diagnosed on the day of the first visit.



**Table S6** Positivity for gonorrhoea, chlamydia, syphilis and HIV among men who have sex with men only and men who have sex with men and women attending a sexual health centre in Melbourne, 2011-2018.

|                                         | MSMO               | MSMW-M        | MSMW-W       | Comparison across three groups | Comparison between MSMW-M and MSM-W |
|-----------------------------------------|--------------------|---------------|--------------|--------------------------------|-------------------------------------|
|                                         | n/N (%)            | n/N (%)       | n/N (%)      | P value                        | P value                             |
| <b>Gonorrhoea</b>                       |                    |               |              |                                |                                     |
| <i>Oropharyngeal</i>                    | 682/11,810 (5.8)   | 44/756 (5.8)  | 18/676 (2.7) | 0.003                          | 0.003                               |
| <i>Urethral</i> <sup>*</sup>            | 390/11,699 (3.3)   | 25/771 (3.2)  | 23/801 (2.9) | 0.775                          | 0.669                               |
| <i>Rectum</i>                           | 745/11,080 (6.7)   | 40/682 (5.9)  | 14/515 (2.7) | 0.001                          | 0.009                               |
| <i>Any anatomical site</i>              | 1321/11,951 (11.1) | 83/771 (10.8) | 45/756 (6.0) | <0.001                         | 0.001                               |
| <b>Chlamydia</b>                        |                    |               |              |                                |                                     |
| <i>Urethral</i>                         | 410/11,699 (3.5)   | 27/771 (3.5)  | 37/801 (4.6) | 0.257                          | 0.262                               |
| <i>Anorectal</i>                        | 989/11,043 (9.0)   | 56/683 (8.2)  | 16/514 (3.1) | <0.001                         | <0.001                              |
| <i>Any anatomical site</i> <sup>†</sup> | 1272/11,891 (10.7) | 74/779 (9.5)  | 49/812 (6.0) | <0.001                         | 0.010                               |
| <b>Syphilis</b>                         | 797/11,317 (7.0)   | 36/737 (4.9)  | 25/744 (3.4) | <0.001                         | 0.140                               |
| <b>HIV (new diagnosis)</b> <sup>‡</sup> | 262/11,102 (2.4)   | 7/738 (0.9)   | 3/749 (0.4)  | <0.001                         | 0.196                               |
| <b>HIV (previous positive)</b>          | 316/12,795 (2.5)   | 6/804 (0.7)   | 1/839 (0.1)  | <0.001                         | 0.051                               |

Note. *n* represents the number of MSM with a positive result and *N* the number of MSM tested. MSM: men who have sex with men; <sup>\*</sup>Before 2015, urethral gonorrhoea testing was only performed among symptomatic MSM with urethral symptoms or self-reported as contact of infection. The number of people tested corresponds to the number of people tested for urethral chlamydia; <sup>†</sup> Any anatomical site for gonorrhoea includes urethral, anorectal and oropharyngeal; while any site for chlamydia includes urethral and anorectal; <sup>‡</sup> Only including HIV cases diagnosed on the day of the first visit.
